# Supplementary material for: In Silico Analysis of the Age-Dependent Evolution of the Transcriptome of Mouse Skin Stem Cells
Source: Cells. 2020 Jan 9;9(1):165. doi: 10.3390/cells9010165 (PMC7016981; doi:10.3390/cells9010165)
Supplement: Supplementary file 1 [file cells-09-00165-s001.zip]

Archive with 6 entries (6 files):
- Table S2.xlsx
- __MACOSX/._Table S2.xlsx
- Bustelo.SuppInfo.Cells.V2.pdf
- __MACOSX/._Bustelo.SuppInfo.Cells.V2.pdf
- Table S1.xlsx
- __MACOSX/._Table S1.xlsx
