# Supplementary material for: In Silico Analysis of the Age-Dependent Evolution of the Transcriptome of Mouse Skin Stem Cells
Source: Cells. 2020 Jan 9;9(1):165. doi: 10.3390/cells9010165 (PMC7016981; doi:10.3390/cells9010165)
Supplement: Supplementary file 1 [file cells-09-00165-s001.zip › Bustelo.SuppInfo.Cells.V2.pdf]

Supplemental Information for

**In silico analysis of the age-dependent evolution of the  
transcriptome of mouse skin stem cells**

by

**L. Francisco Lorenzo-Martín and Xosé R. Bustelo\***

\*To whom correspondence should be addressed. E-mail: [xbustelo@usal.es](mailto:xbustelo@usal.es)

This PDF file includes:

**(1)** Supplemental Figure S1 and legend (pages 2)

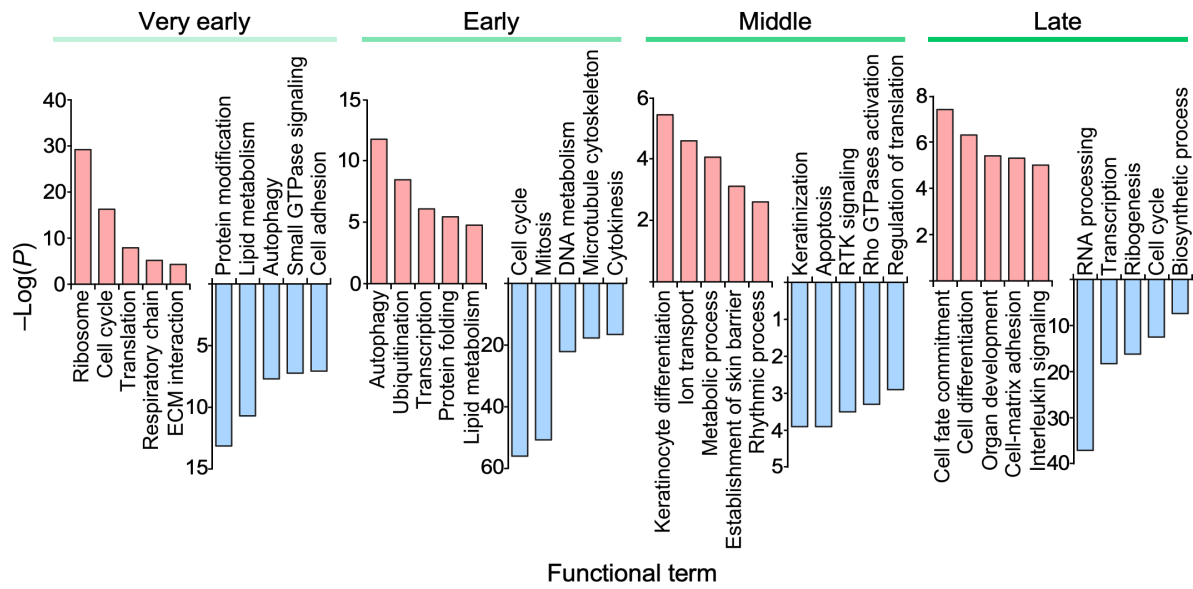

**Figure S1. Time-driven expression patterns in mouse SSCs.** Gene ontology analyses of the indicated gene expression patterns (top) derived from the analyses shown in **Figure 2**. Bar orientation indicates positive (up) and negative (down) enrichment against baseline.
