# Supplementary material for: In Silico Analysis of the Age-Dependent Evolution of the Transcriptome of Mouse Skin Stem Cells
Source: Cells. 2020 Jan 9;9(1):165. doi: 10.3390/cells9010165 (PMC7016981; doi:10.3390/cells9010165)
Supplement: Supplementary file 1 [file cells-09-00165-s001.zip › Table S1.xlsx]

## Sheet: Table S1
Table S1. Transcript composition of the epidermal stem cell dynamic expression patterns
1		1.2		1.5		2		2.3.5		3.5		5.3		6		–1.6		–2		–4.2		–4.6		–5		–6
Probeset	Gene symbol	Probeset	Gene symbol	Probeset	Gene symbol	Probeset	Gene symbol	Probeset	Gene symbol	Probeset	Gene symbol	Probeset	Gene symbol	Probeset	Gene symbol	Probeset	Gene symbol	Probeset	Gene symbol	Probeset	Gene symbol	Probeset	Gene symbol	Probeset	Gene symbol	Probeset	Gene symbol
10517058	1810019J16Rik	10390961	Krtap17-1	10340179	NA	10605711	Pdk3	10339580	NA	10340456	NA	10341955	NA	10338070	NA	10511269	Sdf4	10455599	NA	10338044	NA	10341551	NA	10338865	NA	10338104	NA
10340214	NA	10425161	Lgals1	10409978	Zfp934	10566810	Nrip3	10505270	Slc31a2	10340891	NA	10339515	NA	10338089	NA	10492330	P2ry1	10568258	1700008J07Rik	10338041	NA	10347748	Acsl3	10560315	Ppp5c	10338117	NA
10350044	Rpl29	10406881	Smn1	10569368	NA	10573779	Nkd1	10519693	Sema3d	10339055	NA	10374840	NA	10338130	NA	10396442	Snapc1	10505198	NA	10338161	NA	10422598	Sepp1	10411332	Hmgcr	10338137	NA
10416290	Reep4	10554063	Adamts17	10570741	Defb1	10471474	Ak1	10587023	Rab27a	10339488	NA	10338766	NA	10338203	NA	10512847	Alg2	10379127	Spag5	10344585	NA	10546450	Adamts9	10341701	NA	10338176	NA
10339322	NA	10544062	D630045J12Rik	10369206	Rps8	10393662	Nptx1	10340879	NA	10504203	NA	10449741	Sik1	10338218	NA	10471062	Ntmt1	10462866	Cep55	10338908	NA	10582839	NA	10340932	NA	10338180	NA
10556244	Snora23	10497325	Hmgb1	10531887	Slc10a6	10415095	1700123O20Rik	10422244	Slitrk6	10598041	NA	10342401	NA	10338225	NA	10542836	Klhl42	10458195	Cdc25c	10338026	NA	10358567	Hmcn1	10396076	9330151L19Rik	10338201	NA
10549633	Cdc42ep5	10562627	Ctdnep1	10361906	Il22ra2	10511258	Fam132a	10420366	Gjb6	10341784	NA	10338976	NA	10338268	NA	10413138	Vdac2	10559341	NA	10338001	NA	10546430	Adamts9	10339877	NA	10338298	NA
10538352	NA	10554045	Adamts17	10503833	Rplp1	10341982	NA	10584634	Usp2	10338267	NA	10397346	Fos	10338284	NA	10440550	Ltn1	10493137	Iqgap3	10343054	NA	10358650	Hmcn1	10444436	Fkbpl	10338315	NA
10343423	NA	10456005	Cd74	10498307	NA	10344324	NA	10492428	Tiparp	10598023	NA	10339621	NA	10338305	NA	10338319	NA	10352048	Exo1	10343542	NA	10358565	Hmcn1	10420730	Fdft1	10338353	NA
10515090	Cdkn2c	10338150	NA	10480035	Pfkfb3	10578763	Sap30	10342430	NA	10341200	NA	10340128	NA	10338375	NA	10426557	Pfkm	10569303	NA	10397708	NA	10358660	Hmcn1	10459071	Smim3	10338354	NA
10339585	NA	10541513	NA	10413174	Rps24	10525473	Tmem120b	10339745	NA	10342283	NA	10537787	Tas2r135	10338439	NA	10409261	Diras2	10338658	NA	10338029	NA	10541494	Rps27a	10554013	Chsy1	10338360	NA
10358675	Ivns1abp	10338437	NA	10591208	Uba52	10364502	Palm	10344363	NA	10582896	NA	10385747	Phf15	10338456	NA	10404774	Hivep1	10590494	Kif15	10343574	NA	10344966	Ly96	10406710	Tbca	10338376	NA
10557432	Eif3c	10343555	NA	10505917	NA	10458349	Sra1	10418921	Sncg	10342327	NA	10340936	NA	10338459	NA	10606056	Vma21	10416037	Pbk	10340031	NA	10546432	Adamts9	10512145	Aqp7	10338398	NA
10583314	Taf1d	10387723	2810408A11Rik	10460251	1700055N04Rik	10522467	Rasl11b	10586491	Dapk2	10338624	NA	10425283	Maff	10338490	NA	10597575	Plcd1	10350392	Aspm	10338017	NA	10491300	Skil	10364239	Slc19a1	10338413	NA
10374117	NA	10394831	NA	10382316	Kcnj16	10363161	Tmem229b	10551197	Cyp2b10	10343518	NA	10339305	NA	10338517	NA	10352314	Lefty1	10391811	Kif18b	10338042	NA	10538970	Krcc1	10338872	NA	10338414	NA
10608721	Sts	10364102	Chchd10	10339210	NA	10481128	Med22	10419261	Bmp4	10342318	NA	10514185	NA	10338544	NA	10388971	Utp6	10460738	Cdca5	10341899	NA	10416522	Tsc22d1	10408762	Eef1e1	10338458	NA
10339565	NA	10522712	Rest	10338400	NA	10515536	Ipo13	10491611	4932438A13Rik	10340614	NA	10343664	NA	10338547	NA	10342502	NA	10524450	Ung	10343365	NA	10546434	Adamts9	10403903	Trim27	10338545	NA
10465043	NA	10419563	Rnase1	10569996	NA	10565794	Serpinh1	10344315	NA	10576189	NA	10369792	Arid5b	10338551	NA	10527229	Fam220a	10516225	Rragc	10342780	NA	10358652	Hmcn1	10343032	NA	10338571	NA
10338927	NA	10378549	Rtn4rl1	10343866	NA	10353707	Ptp4a1	10340433	NA	10340152	NA	10338224	NA	10338555	NA	10545910	Pcyox1	10542079	Foxm1	10338036	NA	10358571	Hmcn1	10517070	Zdhhc18	10338689	NA
10342418	NA	10341183	NA	10338737	NA	10339820	NA	10568553	Chst15	10344182	NA	10422822	Lifr	10338582	NA	10382284	Prkar1a	10350838	2810417H13Rik	10344611	NA	10347036	Map2	10566564	Mrpl17	10338700	NA
10427301	Mir615	10379068	Sdf2	10374476	Rps17	10451421	Klhdc3	10587655	Zfp949	10344408	NA	10338657	NA	10338603	NA	10468275	Pcgf6	10568150	Kif22	10344221	NA	10540072	Ppp1r2	10392098	Ftsj3	10338708	NA
10338217	NA	10338532	NA	10432636	Smagp	10442691	Clcn7	10557211	Rbbp6	10338101	NA	10339335	NA	10338609	NA	10338111	NA	10341891	NA	10339878	NA	10358599	Hmcn1	10338106	NA	10338711	NA
10381666	Dcakd	10442596	Msrb1	10399634	NA	10534570	Orai2	10526654	NA	10343082	NA	10392388	Prkca	10338622	NA	10381238	Mlx	10446074	Uhrf1	10341311	NA	10358607	Hmcn1	10493770	Ilf2	10338725	NA
10524965	Fbxw8	10394978	Rrm2	10492689	Pdgfc	10596568	NA	10340309	NA	10485357	NA	10465244	Malat1	10338626	NA	10340937	NA	10454709	Kif20a	10338166	NA	10395163	Lamb1	10342466	NA	10338773	NA
10344057	NA	10343655	NA	10543939	Fam180a	10475324	Ckmt1	10602198	Pak3	10586722	F830001A07Rik	10415952	NA	10338628	NA	10400710	Mettl21d	10387295	Cntrob	10341439	NA	10358557	Hmcn1	10518520	Ubiad1	10338776	NA
10341300	NA	10434144	Rtn4r	10545337	Ppia	10339106	NA	10586250	Dennd4a	10338064	NA	10537785	Tas2r143	10338636	NA	10421573	Cbx3	10480432	NA	10340280	NA	10462507	Papss2	10483023	NA	10338786	NA
10456383	Impa2	10386070	Atox1	10449932	NA	10579347	Ifi30	10537227	Tmem140	10598064	NA	10512352	4933409K07Rik	10338637	NA	10545940	Gmcl1	10573261	Asf1b	10503370	Hnrnpa3	10342996	NA	10528648	Abcf2	10338790	NA
10342282	NA	10342735	NA	10342840	NA	10339926	NA	10394846	NA	10343982	NA	10580282	Junb	10338692	NA	10431170	5031439G07Rik	10352767	Nek2	10341660	NA	10352798	Kcnh1	10413222	Ppif	10338816	NA
10341257	NA	10572663	Pgls	10368083	Ccdc28a	10338741	NA	10344277	NA	10343618	NA	10340186	NA	10338706	NA	10459405	Nars	10577508	Ckap2	10341812	NA	10358569	Hmcn1	10339237	NA	10338852	NA
10593856	C230081A13Rik	10491952	Mgst2	10343844	NA	10490212	Ctsz	10492699	Ctso	10341247	NA	10452918	Strn	10338724	NA	10342201	NA	10515257	Rad54l	10582562	NA	10483667	Cir1	10463355	Scd2	10338880	NA
10342076	NA	10339430	NA	10338534	NA	10487858	Cdc25b	10399202	Macc1	10339230	NA	10504132	Ccl19	10338738	NA	10510254	Fv1	10432473	Nckap5l	10454828	Pnet-ps	10358545	Hmcn1	10430778	Phf5a	10338954	NA
10372114	NA	10553533	NA	10369290	Ddit4	10344446	NA	10375432	Fndc9	10582890	NA	10342979	NA	10338762	NA	10365116	Dohh	10389606	Prr11	10413216	4931406H21Rik	10338933	NA	10343156	NA	10338999	NA
10454057	NA	10386604	Shmt1	10567211	NA	10591739	Acp5	10424126	Deptor	10525185	NA	10340077	NA	10338771	NA	10373355	Spryd4	10487480	Bub1	10342379	NA	10453562	Sft2d1	10533807	Cdk2ap1	10339003	NA
10338334	NA	10383731	Smtn	10405733	Zfp934	10446756	Ypel5	10547217	Csgalnact2	10341501	NA	10342811	NA	10338780	NA	10451123	Slc29a1	10504957	Smc2	10342819	NA	10395252	Ccdc71l	10442454	Pgp	10339025	NA
10341684	NA	10344135	NA	10453632	Rpl7a	10564663	Tdg	10340673	NA	10339647	NA	10344533	NA	10338785	NA	10518385	Mfn2	10421029	Cdca2	10570002	2410089E03Rik	10407291	Arl15	10340779	NA	10339078	NA
10340715	NA	10518333	NA	10343705	NA	10385382	Sft2d1	10529758	Bod1l	10555009	Mir708	10339881	NA	10338803	NA	10571241	Purg	10508996	Clhc1	10386187	Rpl24	10546452	Adamts9	10436941	Mrps6	10339103	NA
10339244	NA	10540059	Slc41a3	10604671	NA	10440731	Krtap11-1	10503249	Rpl13	10598062	NA	10410362	Zfp738	10338807	NA	10561343	Josd1	10385248	Hmmr	10339353	NA	10446763	Lbh	10416273	Phyhip	10339119	NA
10394776	NA	10343692	NA	10410287	Zfp458	10389590	Gdpd1	10498584	Rarres1	10339418	NA	10342440	NA	10338860	NA	10519234	B3galt6	10400589	Mis18bp1	10339146	NA	10499902	Sprr4	10340654	NA	10339172	NA
10551155	Lipe	10523376	Fras1	10338241	NA	10601854	Wbp5	10480445	Spopl	10339633	NA	10344195	NA	10338900	NA	10456709	Rpl17	10420877	Esco2	10342754	NA	10358633	Hmcn1	10425983	Mirlet7c-2	10339174	NA
10338135	NA	10542875	3010003L21Rik	10532857	Gltp	10403076	NA	10378816	Slc6a4	10513141	Ptpn3	10343614	NA	10338956	NA	10465215	Sssca1	10534984	Mir25	10343247	NA	10358563	Hmcn1	10340577	NA	10339242	NA
10604019	1810037I17Rik	10367379	Pmel	10548246	NA	10341196	NA	10365482	Timp3	10343731	NA	10341372	NA	10338991	NA	10409322	Thoc3	10489958	Kcng1	10338004	NA	10518526	Angptl7	10405783	Mir24-1	10339293	NA
10373388	Nabp2	10489038	Scand1	10585697	NA	10597470	Cmtm8	10503359	Rbm12b2	10598055	NA	10343552	NA	10339005	NA	10341671	NA	10581212	Mir328	10341332	NA	10344805	Cspp1	10382376	Ttyh2	10339319	NA
10553859	NA	10377508	Trappc1	10389229	Rpl9	10582295	Odc1	10583347	Chordc1	10342752	NA	10342833	NA	10339020	NA	10370552	Ppap2c	10346365	Sgol2	10343916	NA	10341274	NA	10585706	Cox5a	10339355	NA
10510172	Hmgb2	10526482	Polr2j	10597490	Rps27	10429391	Slc45a4	10403283	Calm5	10344197	NA	10338154	NA	10339028	NA	10352777	Slc30a1	10408081	Hist1h1b	10341988	NA	10358617	Hmcn1	10342504	NA	10339375	NA
10342289	NA	10420089	Nedd8	10399760	Rps7	10373902	Gatsl3	10544629	Tra2a	10582882	NA	10342315	NA	10339061	NA	10585417	Idh3a	10340295	NA	10454807	Snora74a	10517463	Luzp1	10363901	Etv5	10339404	NA
10427991	Trio	10427895	Basp1	10457927	NA	10543544	Lrrc4	10543471	Pot1a	10341230	NA	10343757	NA	10339076	NA	10393620	Cbx4	10356780	Pask	10341161	NA	10584870	Tmprss13	10519268	Mir200b	10339429	NA
10339989	NA	10338751	NA	10365974	Dcn	10383799	Tcn2	10367734	Ust	10504148	4933409K07Rik	10340157	NA	10339091	NA	10359948	Uap1	10360985	Cenpf	10338424	NA	10339163	NA	10450640	Mrps18b	10339437	NA
10353061	NA	10344241	NA	10435980	Rps24	10427125	Igfbp6	10532301	NA	10339798	NA	10338509	NA	10339095	NA	10343407	NA	10545672	Mthfd2	10338025	NA	10442240	Zfp760	10407222	Dhx29	10339439	NA
10339786	NA	10529264	Spon2	10414078	Rpl23a	10511617	Fam92a	10341919	NA	10338824	NA	10338170	NA	10339121	NA	10463224	Marveld1	10601011	Kif4	10340700	NA	10534596	Cux1	10343621	NA	10339451	NA
10387222	Pfas	10344598	NA	10454296	Rpl19	10436830	Ifnar2	10597420	Ccr4	10338281	NA	10573865	Gm3579	10339123	NA	10453429	Pigf	10577421	Gm14851	10338589	NA	10552037	Sbsn	10430846	Ndufa6	10339495	NA
10554061	Adamts17	10608692	Rn4.5s	10497918	NA	10437963	Mzt2	10469571	Otud1	10338647	NA	10338581	NA	10339125	NA	10494735	Gdap2	10389395	Brip1	10411454	Sec61b	10358625	Hmcn1	10607113	Rgs3	10339542	NA
10547206	Fxyd4	10355500	Igfbp5	10499854	S100a1	10370037	Mmp11	10436590	2810055G20Rik	10514070	2310067E19Rik	10595831	Zbtb38	10339164	NA	10340291	NA	10525591	Kntc1	10343567	NA	10422028	Tbc1d4	10343841	NA	10339545	NA
10588043	Rbp2	10339117	NA	10577641	1810011O10Rik	10405994	Med10	10341589	NA	10348078	Ptma	10406399	Pou5f2	10339183	NA	10339577	NA	10366277	E2f7	10338003	NA	10358527	Hmcn1	10344106	NA	10339561	NA
10341991	NA	10421309	Slc39a14	10532921	Sppl3	10511180	Mxra8	10513008	Klf4	10396419	Prkch	10589846	NA	10339217	NA	10597817	Cck	10489078	Dsn1	10338169	NA	10542317	Cdkn1b	10412909	Fdft1	10339572	NA
10582403	Galns	10437205	Pcp4	10599696	Ddx26b	10402268	Lgmn	10343103	NA	10341770	NA	10583203	Phxr4	10339219	NA	10453575	Cul2	10378053	Fam64a	10340132	NA	10458940	Zfp608	10343307	NA	10339578	NA
10438338	Mir185	10338160	NA	10420986	NA	10544829	Jazf1	10484520	4833423E24Rik	10340185	NA	10342798	NA	10339241	NA	10566870	Tmem41b	10515744	Cdc20	10548139	NA	10338691	NA	10339070	NA	10339595	NA
10570556	Mcph1	10343405	NA	10358432	Zfp825	10595979	Mras	10521459	Psapl1	10339498	NA	10344115	NA	10339271	NA	10338648	NA	10353420	Mcm3	10340426	NA	10560862	Pinlyp	10339312	NA	10339704	NA
10583316	Taf1d	10481621	1110008P14Rik	10518147	Pdpn	10475247	Tmem62	10344193	NA	10338512	NA	10341924	NA	10339284	NA	10461220	Hnrnpul2	10521731	Ncapg	10435185	NA	10338728	NA	10474541	Nop10	10339729	NA
10421906	NA	10342896	NA	10494428	Txnip	10511282	Tnfrsf4	10593634	Elmod1	10342589	NA	10338482	NA	10339302	NA	10525271	Naa25	10527043	Amz1	10338746	NA	10358601	Hmcn1	10339459	NA	10339737	NA
10341625	NA	10338963	NA	10344581	NA	10384956	Chac2	10424485	Phf20l1	10338067	NA	10391744	Gpatch8	10339352	NA	10582231	Fbxo31	10554445	Prc1	10339619	NA	10451763	Satb1	10593356	Sdhd	10339766	NA
10572813	Usmg5	10549495	Rps29	10338498	NA	10510473	Ctnnbip1	10447317	Epas1	10340297	NA	10344210	NA	10339363	NA	10344234	NA	10408202	Hist1h3f	10338346	NA	10410947	Xrcc4	10340872	NA	10339770	NA
10447699	NA	10563110	Snord34	10490256	Rps8	10489646	Slc35c2	10515144	Skint10	10339841	NA	10342409	NA	10339371	NA	10514221	Plin2	10424779	Cks2	10338254	NA	10442219	Zfp52	10358982	Mr1	10339873	NA
10500333	Hist2h4	10344551	NA	10466839	NA	10587284	Elovl5	10341282	NA	10343880	NA	10339915	NA	10339466	NA	10539933	Txnrd3	10451805	Sgol1	10510445	NA	10358561	Hmcn1	10533145	Tpcn1	10339891	NA
10343427	NA	10596575	Manf	10421810	Rgcc	10581560	Psmd7	10472538	Dhrs9	10338926	NA	10502770	Lphn2	10339477	NA	10555946	Smpd1	10488437	NA	10339997	NA	10422718	Ttc33	10469849	Zmynd19	10339902	NA
10553831	Gm7367	10381096	Igfbp4	10354816	Clk1	10468309	Sh3pxd2a	10414113	Wapal	10343824	NA	10340216	NA	10339513	NA	10475350	Serf2	10540738	Fancd2	10340681	NA	10358575	Hmcn1	10367708	Pcmt1	10339925	NA
10507431	NA	10338393	NA	10563350	Fut2	10342405	NA	10358879	Npl	10338325	NA	10344085	NA	10339514	NA	10471555	Angptl2	10430825	Cenpm	10342930	NA	10579012	Csgalnact1	10342816	NA	10339938	NA
10505090	Rpl29	10340478	NA	10552064	Krtdap	10400844	Pygl	10442236	3110052M02Rik	10342380	NA	10416057	Clu	10339519	NA	10426544	Slc48a1	10548086	Rad51ap1	10341771	NA	10358631	Hmcn1	10459193	Ppargc1b	10339939	NA
10592629	Grik4	10424379	Srsf3	10341117	NA	10500802	Atg4a	10342255	NA	10341888	NA	10338465	NA	10339537	NA	10458569	Nr3c1	10474769	Bub1b	10455015	Vaultrc5	10358593	Hmcn1	10338996	NA	10340043	NA
10340790	NA	10455919	Adamts19	10497501	Naaladl2	10600857	Heph	10464999	Cst6	10340263	NA	10342536	NA	10339547	NA	10480921	Qsox2	10377662	Ybx2	10341073	NA	10397633	Flrt2	10394690	E2f6	10340064	NA
10342147	NA	10344102	NA	10394119	Zfp750	10398721	Apopt1	10345752	Il1r2	10340945	NA	10523168	Epgn	10339553	NA	10411432	Utp15	10408070	Hist1h2br	10598083	NA	10589076	Slc25a20	10440483	Atp5j	10340149	NA
10357878	Adora1	10380419	Col1a1	10468881	5830428H23Rik	10469951	Rnf208	10505028	NA	10338869	NA	10342533	NA	10339570	NA	10455299	Sh3rf2	10420426	Ska3	10408329	NA	10546454	Adamts9	10488926	Mmp24	10340208	NA
10372102	NA	10469129	4930412O13Rik	10430743	Rpl29	10511290	Tnfrsf18	10435802	NA	10342395	NA	10340294	NA	10339584	NA	10561842	Capns1	10409424	Mxd3	10509063	Il22ra1	10340159	NA	10388880	Tmem97	10340240	NA
10341191	NA	10347282	Rufy4	10344273	NA	10476560	Ism1	10363773	Rhobtb1	10340894	NA	10339223	NA	10339587	NA	10506050	Nfia	10557156	Plk1	10338059	NA	10590445	Snrk	10338361	NA	10340293	NA
10342060	NA	10342951	NA	10513737	Rpl17	10378568	Mir22hg	10343152	NA	10339162	NA	10338541	NA	10339606	NA	10550706	NA	10479811	Mcm10	10343580	NA	10358517	Hmcn1	10420030	Psme2	10340331	NA
10340888	NA	10416004	Zfp395	10472501	Cers6	10447880	Mrpl18	10340385	NA	10339536	NA	10462086	NA	10339625	NA	10573998	Ogfod1	10582809	Tk1	10339325	NA	10535938	N4bp2l1	10502146	Gar1	10340362	NA
10451591	Tomm6	10581159	Fam96b	10341636	NA	10343413	NA	10354003	Mgat4a	10342869	NA	10338794	NA	10339626	NA	10398751	Zfyve21	10414315	Cdkn3	10340016	NA	10358648	Hmcn1	10528662	Atp5l	10340363	NA
10342799	NA	10530827	Spink2	10568532	Rpl7a	10604230	Ap3s1	10410364	Zfp738	10441813	Snora20	10341054	NA	10339632	NA	10595407	Ibtk	10367179	Timeless	10339231	NA	10497752	Carhsp1	10436446	Gps1	10340423	NA
10404024	Hist1h4h	10554789	Ctsc	10546292	NA	10468869	Prdx3	10342177	NA	10344386	NA	10340086	NA	10339638	NA	10475394	Ctdspl2	10594251	Kif23	10343590	NA	10358521	Hmcn1	10343418	NA	10340460	NA
10362394	Hddc2	10487392	Kcnip3	10452384	Rpl7a	10364784	Reep6	10339703	NA	10343102	NA	10343144	NA	10339644	NA	10424853	Fam203a	10578690	Neil3	10343323	NA	10396936	Smoc1	10339889	NA	10340490	NA
10490824	Rpl29	10443786	Pde9a	10519321	Gm15772	10448455	Atp6v0c	10565456	Prss23	10343279	NA	10338800	NA	10339650	NA	10383708	Rnf185	10402708	Ckb	10344554	NA	10491036	Nudt21	10500034	Psmb4	10340504	NA
10339185	NA	10409278	Nfil3	10576210	Rpl13	10465580	Nudt22	10342036	NA	10341978	NA	10545099	NA	10339664	NA	10572235	Lpar2	10452709	Ndc80	10342534	NA	10358515	Hmcn1	10395816	Psma6	10340507	NA
10339141	NA	10355403	Fn1	10366951	Ndufa4l2	10342967	NA	10408616	Slc22a23	10341402	NA	10339102	NA	10339674	NA	10506118	Usp1	10442331	Pkmyt1	10338419	NA	10544837	Tril	10338759	NA	10340521	NA
10342330	NA	10341845	NA	10344117	NA	10460591	Fibp	10339396	NA	10344455	NA	10341700	NA	10339699	NA	10516371	2001-08-01	10541729	Cdca3	10342991	NA	10358611	Hmcn1	10342233	NA	10340528	NA
10523577	Wdfy3	10393166	St6galnac2	10542340	8430419L09Rik	10545835	Pradc1	10338556	NA	10344357	NA	10340704	NA	10339718	NA	10338988	NA	10478572	Ube2c	10344289	NA	10488147	Flrt3	10484927	Slc39a13	10340534	NA
10338362	NA	10343500	NA	10486448	Pla2g4f	10428918	9930014A18Rik	10425299	Tomm22	10546508	NA	10343068	NA	10339730	NA	10489065	Ndrg3	10465861	Incenp	10339816	NA	10358619	Hmcn1	10475990	Slc20a1	10340539	NA
10343605	NA	10341986	NA	10515416	Rps8	10422249	Dct	10468533	Gpam	10389699	NA	10400006	Ahr	10339763	NA	10565152	Homer2	10419323	Dlgap5	10339562	NA	10358529	Hmcn1	10569200	Polr2l	10340569	NA
10515429	Snord55	10540118	Lsm3	10485828	Slc12a6	10513952	3110001D03Rik	10571657	Acsl1	10338223	NA	10344264	NA	10339768	NA	10341072	NA	10569100	Mir210	10338173	NA	10498210	Nbea	10436951	Smim11	10340589	NA
10351504	NA	10367422	Sarnp	10492229	Rpl13	10533316	Erp29	10594800	Fam63b	10343998	NA	10338372	NA	10339780	NA	10360920	Tgfb2	10359890	Nuf2	10339157	NA	10560491	Klc3	10360443	Fh1	10340616	NA
10343055	NA	10579302	Uba52	10340245	NA	10343245	NA	10422412	Slc15a1	10342402	NA	10491627	4932438A13Rik	10339802	NA	10338466	NA	10383717	Inpp5j	10571876	Gapdh	10582862	Arhgef12	10534728	Slc12a9	10340637	NA
10338228	NA	10513739	Tnc	10339596	NA	10355984	Serpine2	10446739	Clip4	10339424	NA	10603099	Figf	10339815	NA	10411751	Slc30a5	10432511	Racgap1	10338035	NA	10420362	Gjb2	10381416	Rnd2	10340643	NA
10419034	2610528A11Rik	10582821	NA	10422059	Kctd12	10344194	NA	10571567	Sorbs2	10340393	NA	10341647	NA	10339824	NA	10373367	Coq10a	10480087	NA	10344238	NA	10342112	NA	10338339	NA	10340658	NA
10468287	Usmg5	10585097	Gm5617	10392410	NA	10504398	Serf2	10349147	Serpinb7	10342037	NA	10338411	NA	10339839	NA	10500011	Tuft1	10591556	Spc24	10344344	NA	10439138	Kalrn	10521205	Sh3bp2	10340758	NA
10408212	Hist1h2be	10443808	Ndufv3	10466680	Klf9	10488806	Eif2s2	10356172	Pid1	10516735	Tinagl1	10556442	Tead1	10339843	NA	10579356	Pik3r2	10470909	NA	10340136	NA	10342747	NA	10347193	Atic	10340812	NA
10338955	NA	10551009	Tmsb10	10342963	NA	10602840	Sh3kbp1	10578071	Wrn	10598032	NA	10338882	NA	10339928	NA	10386934	Wsb2	10404069	Hist1h1a	10413813	Galnt15	10340904	NA	10406250	Rpl37a	10340825	NA
10342904	NA	10535021	Gpc2	10443463	Cdkn1a	10508901	Gpn2	10442238	3110052M02Rik	10583044	Mmp13	10341221	NA	10339937	NA	10572733	Zfp961	10548785	Dynlt1c	10343993	NA	10408450	Sox4	10343719	NA	10340831	NA
10338311	NA	10365145	Tle2	10493925	Hrnr	10338535	NA	10338920	NA	10490248	NA	10339563	NA	10339949	NA	10558948	Cd151	10453512	Kpna2	10340443	NA	10358658	Hmcn1	10508707	NA	10340858	NA
10608482	NA	10341271	NA	10531340	Rpl13	10342051	NA	10385083	Gabrp	10339618	NA	10472240	Tanc1	10339958	NA	10508420	Yars	10554325	Ticrr	10343226	NA	10539433	NA	10338081	NA	10340969	NA
10583142	Rpl29	10583465	Ubl5	10571840	Hpgd	10401454	Entpd5	10340229	NA	10591628	Dock6	10421046	Dock5	10339985	NA	10390519	Plxdc1	10352709	Nsl1	10340029	NA	10358627	Hmcn1	10415413	Nynrin	10341019	NA
10338429	NA	10409486	Pdlim7	10339446	NA	10557560	Cdipt	10342702	NA	10604832	Mir505	10491625	4932438A13Rik	10340004	NA	10338529	NA	10350297	Kif14	10338107	NA	10358654	Hmcn1	10341913	NA	10341116	NA
10543114	Rpa3	10410650	Zfp825	10374453	Glul	10344495	NA	10502823	Dnajb4	10343298	NA	10418169	NA	10340027	NA	10339356	NA	10393431	Tk1	10402750	Hmgb1	10340209	NA	10593015	Cd3g	10341158	NA
10543017	Pdk4	10338705	NA	10343305	NA	10433264	Glis2	10341641	NA	10338822	NA	10342256	NA	10340030	NA	10363563	Slc25a16	10448975	Chtf18	10526931	Cyp2w1	10598499	NA	10380524	Slc35b1	10341167	NA
10562084	Haus5	10387536	Cd68	10342309	NA	10546706	Rybp	10344351	NA	10339522	NA	10414427	Gm6498	10340057	NA	10433904	Yars2	10363575	Dna2	10343604	NA	10358573	Hmcn1	10342553	NA	10341189	NA
10468016	Ndufb8	10372891	Srgap1	10340919	NA	10340585	NA	10500666	Ptgfrn	10340501	NA	10543785	AB041803	10340084	NA	10433672	Rrn3	10474984	Nusap1	10344201	NA	10490126	Rps29	10393926	Dcxr	10341234	NA
10351041	NA	10511679	Decr1	10594277	Paqr5	10338841	NA	10375503	Trim7	10339321	NA	10537244	Rpl17	10340092	NA	10554240	Isg20	10547943	Ncapd2	10357946	Ppp1r12b	10396840	Rdh12	10468081	Npm3	10341276	NA
10341043	NA	10447591	Ftl1	10341937	NA	10358541	Hmcn1	10340757	NA	10339401	NA	10342995	NA	10340119	NA	10348858	Bok	10554281	Fanci	10598053	NA	10358555	Hmcn1	10342914	NA	10341299	NA
10404063	Hist1h2ab	10340036	NA	10515702	Szt2	10379034	Tlcd1	10604248	Thoc2	10558910	Rangrf	10435266	Heg1	10340139	NA	10395805	Fam177a	10449292	Nkx2-5	10441494	Tulp4	10367746	Sash1	10402579	Slc25a29	10341317	NA
10373093	Dtx3	10390969	Krt33b	10341777	NA	10377953	Kif1c	10344270	NA	10598057	NA	10342073	NA	10340145	NA	10383556	Fn3krp	10580135	Mir181d	10363415	Spock2	10358583	Hmcn1	10350003	Cyb5r1	10341342	NA
10344552	NA	10441539	Rnaset2a	10584350	Tpt1	10603373	Pqbp1	10339412	NA	10338793	NA	10344931	Rpl5	10340172	NA	10591494	S1pr5	10497520	Ect2	10476590	Macrod2	10403281	Calm4	10535979	Rfc3	10341388	NA
10394731	NA	10523190	Parm1	10531544	Paqr3	10548128	Tspan9	10485170	Cry2	10338480	NA	10342439	NA	10340233	NA	10446235	Trip10	10377405	Aurkb	10339931	NA	10484463	Serping1	10344466	NA	10341390	NA
10338743	NA	10571865	Scrg1	10579828	Rps25	10378802	Blmh	10341526	NA	10340388	NA	10454782	Egr1	10340266	NA	10394498	Wdr35	10586448	2810417H13Rik	10338213	NA	10547227	Ret	10593024	Cd3e	10341408	NA
10451549	NA	10359161	Soat1	10444674	Ly6g6c	10338332	NA	10340065	NA	10340909	NA	10340989	NA	10340277	NA	10591482	Keap1	10450374	D17H6S56E-5	10548598	NA	10358605	Hmcn1	10510629	Nol9	10341414	NA
10608136	NA	10353252	Sbspon	10471503	Taf1d	10534456	Hip1	10343005	NA	10340731	NA	10513164	Ptpn3	10340281	NA	10557528	Kctd13	10381548	BC030867	10423520	Sema5a	10358535	Hmcn1	10486681	Tgm5	10341447	NA
10486255	Oip5	10341321	NA	10515113	Hnrnpa3	10402730	Ppp1r13b	10513504	Mup2	10342344	NA	10344316	NA	10340286	NA	10340799	NA	10449111	Wdr90	10342890	NA	10340645	NA	10569017	Ifitm3	10341464	NA
10490159	Pmepa1	10381304	Vps25	10466923	Gm10136	10387368	Tmem88	10521471	Ppp2r2c	10343513	NA	10375820	Clk4	10340319	NA	10562461	C230052I12Rik	10574780	Hsd11b2	10339906	NA	10494395	Hist2h2aa1	10420668	Mir15a	10341514	NA
10338290	NA	10500268	Mrps21	10595392	Elovl4	10514933	Cpt2	10339832	NA	10342144	NA	10586967	Gm7265	10340323	NA	10415980	Fbxo16	10507433	Ptch2	10459210	Arhgef37	10358525	Hmcn1	10568392	Rgs10	10341560	NA
10546294	Nup210	10343816	NA	10342566	NA	10451993	D17Wsu104e	10338487	NA	10342924	NA	10339930	NA	10340327	NA	10355214	Idh1	10594426	Zwilch	10344475	NA	10388824	Foxn1	10444394	Pbx2	10341582	NA
10381361	Aoc2	10580286	Best2	10421917	Pabpc4	10562761	Clec11a	10407126	Plk2	10343569	NA	10340597	NA	10340352	NA	10594762	Fam81a	10603431	Suv39h1	10338178	NA	10363173	Gja1	10413243	Duxbl1	10341596	NA
10528970	Gm5299	10396440	NA	10494160	Tmod4	10571214	Rnf122	10403352	Klf6	10341120	NA	10435271	Heg1	10340374	NA	10341681	NA	10524169	Pole	10338587	NA	10399360	Rhob	10499378	Sema4a	10341665	NA
10362892	Pam16	10550326	Ap2s1	10592983	Atp5l	10395129	Tmem18	10355017	Sumo1	10339291	NA	10343840	NA	10340401	NA	10476691	Polr3f	10586842	Fam63b	10341195	NA	10409970	Zfp935	10432509	Uxt	10341699	NA
10417264	Gm3002	10338098	NA	10428613	NA	10426611	Cacnb3	10410970	Hnrnpk	10504178	4933409K07Rik	10343838	NA	10340435	NA	10524882	Wsb2	10598111	Dhrsx	10339385	NA	10523579	Arhgap24	10472782	Hat1	10341713	NA
10559172	Krtap5-3	10340411	NA	10495989	Rpl7a	10358666	Hmcn1	10353265	Rpl7	10339361	NA	10339702	NA	10340437	NA	10342675	NA	10572605	Ankle1	10338094	NA	10358623	Hmcn1	10474860	Chst14	10341773	NA
10386546	NA	10344480	NA	10601044	Gdpd2	10400649	Pole2	10376163	Rapgef6	10339639	NA	10447649	Fndc1	10340441	NA	10531407	Cxcl9	10390707	Top2a	10342950	NA	10358547	Hmcn1	10445558	Dnph1	10341782	NA
10340371	NA	10512251	AI464131	10539015	NA	10343042	NA	10513512	Mup1	10339336	NA	10570432	Snora3	10340467	NA	10508115	Stk40	10338831	NA	10339569	NA	10372177	Tmtc2	10506571	Dhcr24	10341876	NA
10342939	NA	10505120	Palm2	10344583	NA	10343927	NA	10343690	NA	10339473	NA	10342027	NA	10340479	NA	10517263	Mtfr1l	10553115	Lmtk3	10561983	BC053749	10358549	Hmcn1	10520362	Insig1	10341881	NA
10567106	Rps4y2	10340549	NA	10421972	Rpl36a	10375079	Ubtd2	10573924	Mmp2	10398615	NA	10551998	NA	10340499	NA	10342986	NA	10575733	Cenpn	10338249	NA	10555027	Gab2	10384145	H2afv	10341883	NA
10339497	NA	10342056	NA	10606989	Tsc22d3	10339993	NA	10534945	Cyp3a13	10413012	Fut11	10499911	Lce1a1	10340503	NA	10553301	Ldha	10381402	Rpl27	10343749	NA	10358629	Hmcn1	10506880	Kti12	10341895	NA
10338210	NA	10570068	Col4a2	10338316	NA	10566132	Rhog	10339955	NA	10342538	NA	10357875	Btg2	10340505	NA	10404763	Tmem170b	10598794	NA	10340390	NA	10558150	Htra1	10436048	Prdx1	10342023	NA
10444041	Ndufa7	10498119	Frem2	10565083	Rps17	10605315	Lage3	10525165	Oas1f	10341780	NA	10343406	NA	10340513	NA	10542738	NA	10339267	NA	10408739	Dsp	10347933	Sp140	10588577	Cish	10342026	NA
10404067	Hist1h4b	10353479	Rims1	10430572	NA	10402752	2010107E04Rik	10359689	Atp1b1	10344393	NA	10462091	Klf9	10340515	NA	10497920	Ankrd50	10512489	Arhgef39	10445542	NA	10342270	NA	10340279	NA	10342133	NA
10366705	NA	10502949	NA	10496735	Rpl36a	10340952	NA	10490250	Gm14391	10503281	Gxylt1	10416777	Klf5	10340543	NA	10575184	Wwp2	10342414	NA	10340404	NA	10395103	Pxdn	10529547	NA	10342160	NA
10344590	NA	10554074	Adamts17	10432897	Krt79	10558921	Pnpla2	10588007	Tfdp2	10339640	NA	10442052	Gm6712	10340547	NA	10487021	Slc30a4	10562637	Ccnb1	10504172	4933409K07Rik	10358621	Hmcn1	10531415	Cxcl10	10342168	NA
10343289	NA	10341011	NA	10469801	Il1f5	10450814	Ppp1r11	10578069	Gtpbp10	10586718	9530091C08Rik	10449312	1700062I23Rik	10340548	NA	10419073	Tspan14	10504470	Melk	10582078	NA	10527571	NA	10544751	Hoxa2	10342204	NA
10339212	NA	10448380	Tceb2	10342176	NA	10465474	Prdx5	10405935	Rplp0	10343208	NA	10338765	NA	10340623	NA	10574471	Cmtm3	10494386	Hist2h2ab	10343598	NA	10566822	Scube2	10558840	Rassf7	10342209	NA
10342362	NA	10585942	Gramd2	10485700	Bbox1	10461108	Iscu	10495685	Arhgap29	10598027	NA	10341322	NA	10340666	NA	10430593	Josd1	10426669	Troap	10340617	NA	10494007	Them4	10392947	Sumo2	10342210	NA
10416736	Bora	10458386	Ndufa2	10414431	Gapdh	10341163	NA	10428310	Azin1	10340662	NA	10438738	Bcl6	10340671	NA	10567010	Dkk3	10513818	Stmn1	10344390	NA	10572897	Hmox1	10430660	Pdgfb	10342222	NA
10341459	NA	10461156	Snhg1	10384423	Cobl	10338387	NA	10598798	Kdm6a	10340711	NA	10344075	NA	10340698	NA	10350039	Rabif	10487340	Ncaph	10342527	NA	10550870	Lypd5	10364571	Wdr18	10342286	NA
10340241	NA	10371277	Zfp938	10418498	Rpl7a	10434934	Bdh1	10363894	Ipmk	10341121	NA	10340123	NA	10340712	NA	10348775	Ppp1r7	10546834	Rad18	10339084	NA	10476545	Sptlc3	10476889	Nxt1	10342293	NA
10536103	NA	10390430	Srcin1	10342382	NA	10340742	NA	10524082	NA	10482918	NA	10340852	NA	10340724	NA	10342698	NA	10353004	Cks2	10344134	NA	10342745	NA	10581505	Rpl10	10342305	NA
10354504	NA	10565811	Snord15b	10530560	Slain2	10358656	Hmcn1	10432852	Krt1	10341109	NA	10499655	Il6ra	10340750	NA	10527965	Cldn12	10538832	Mad2l1	10367770	NA	10340045	NA	10578916	Sc4mol	10342343	NA
10344006	NA	10340163	NA	10432866	Krt77	10469404	Cacnb2	10342211	NA	10340313	NA	10340644	NA	10340784	NA	10391625	Ubtf	10341614	NA	10339082	NA	10340300	NA	10415408	Nynrin	10342353	NA
10338078	NA	10505623	Lurap1l	10571310	Rpl29	10475027	Tyro3	10344658	Rb1cc1	10340164	NA	10338861	NA	10340796	NA	10449363	Nudt3	10404061	Hist1h2bb	10343589	NA	10414514	Pnp	10518455	Agtrap	10342355	NA
10584576	Snord14d	10340572	NA	10460782	Gpha2	10339697	NA	10368229	Tbpl1	10342496	NA	10344204	NA	10340854	NA	10475772	Stard7	10410560	Trip13	10380065	Rnu3b1	10358613	Hmcn1	10561664	Rasgrp4	10342459	NA
10589793	NA	10598178	Disp1	10515803	Wdr65	10436978	Cbr3	10355343	Abca12	10341479	NA	10416800	Lmo7	10340883	NA	10341714	NA	10528915	Tyms	10342398	NA	10358513	Hmcn1	10344038	NA	10342460	NA
10433032	NA	10498058	Ndufc1	10472235	Dapl1	10516335	Tekt2	10484357	Rps4x	10341042	NA	10343538	NA	10340893	NA	10339785	NA	10342750	NA	10516277	Sh3d21	10354588	Stk17b	10339436	NA	10342499	NA
10388225	NA	10382797	Ubald2	10338923	NA	10341070	NA	10558740	NA	10343941	NA	10361091	Atf3	10340897	NA	10405343	Tspan17	10555695	Rrm1	10343488	NA	10499899	Sprr1a	10342198	NA	10342517	NA
10504609	NA	10585048	Cadm1	10343494	NA	10408487	Uqcrfs1	10343312	NA	10340947	NA	10341380	NA	10340928	NA	10566516	Rrp8	10400393	Fam177a	10380927	Grb7	10430723	St13	10420891	Scara3	10342524	NA
10515692	Szt2	10496379	H2afz	10446425	NA	10432711	Krt84	10343906	NA	10436596	NA	10580955	NA	10340940	NA	10444268	Tap2	10496204	Cenpe	10340370	NA	10500808	Olfml3	10415875	Pinx1	10342530	NA
10499130	Rnu73b	10431147	Ldoc1l	10340193	NA	10378570	NA	10544638	Tra2a	10343146	NA	10341624	NA	10340974	NA	10447038	1110001A16Rik	10588874	Bsn	10344815	Cspp1	10427268	Hoxc13	10438517	Alg3	10342559	NA
10381601	Mdk	10560945	Grik5	10540298	Chl1	10358672	Hmcn1	10574087	Herpud1	10342364	NA	10437516	Ppl	10341048	NA	10347417	Bcs1l	10443117	Bak1	10427253	Map3k12	10371379	Nuak1	10361265	Mir205	10342662	NA
10347310	Pnkd	10470101	Clic3	10433937	NA	10340581	NA	10340836	NA	10341136	NA	10356269	Sp140	10341063	NA	10594652	Lactb	10408246	Hist1h3a	10339449	NA	10428089	Nipal2	10340571	NA	10342739	NA
10571870	Hmgb2	10340238	NA	10444680	Ly6g6e	10413416	Il17rd	10501567	Rnpc3	10344122	NA	10513160	Ptpn3	10341075	NA	10575153	Cyb5b	10577946	Prosc	10340022	NA	10343879	NA	10512125	Psenen	10342763	NA
10562989	Cpt1c	10339692	NA	10604597	Rps17	10390685	Ormdl3	10338625	NA	10339094	NA	10340310	NA	10341118	NA	10517948	Spen	10485963	Arhgap11a	10340274	NA	10526410	Hspb1	10516064	Mfsd2a	10342831	NA
10462879	NA	10599576	Ppdpf	10509560	Rpl38	10571601	Pdlim3	10343697	NA	10339299	NA	10343875	NA	10341122	NA	10596857	Apeh	10372796	Hmga2	10341329	NA	10498775	Golim4	10518837	Camta1	10342878	NA
10340429	NA	10563099	Snord35b	10351035	Gas5	10418817	Chat	10378783	Rpl36	10341940	NA	10367772	Samd5	10341127	NA	10541711	Phb2	10373179	Gli1	10338804	NA	10341765	NA	10343463	NA	10342887	NA
10339597	NA	10365288	Taf10	10597459	NA	10343657	NA	10401028	Sgpp1	10339611	NA	10339381	NA	10341131	NA	10567299	Itpripl2	10490104	Aurka	10409526	Fam193b	10499904	Ivl	10352969	Npbwr1	10342892	NA
10338474	NA	10542750	Med21	10528544	Rpl11	10360914	Lyplal1	10341655	NA	10343987	NA	10502552	Clca1	10341212	NA	10541873	Mrpl51	10574018	Mt3	10339709	NA	10358591	Hmcn1	10541803	Chd4	10342980	NA
10342733	NA	10551169	B3gnt8	10340438	NA	10404874	Mylip	10342279	NA	10341870	NA	10338297	NA	10341261	NA	10504672	Tdrd7	10384776	5730522E02Rik	10344511	NA	10358635	Hmcn1	10375893	Sar1b	10342982	NA
10342603	NA	10489343	Ptpla	10339648	NA	10412667	Ptprg	10404965	Rnf144b	10342423	NA	10340639	NA	10341340	NA	10495111	Wdr77	10494405	Hist2h3b	10340761	NA	10358615	Hmcn1	10459944	Nfatc1	10343013	NA
10536949	Strip2	10510687	Acot7	10388782	NA	10572722	Gm3771	10350758	NA	10339358	NA	10340738	NA	10341343	NA	10459534	Afg3l2	10474902	Rad51	10340373	NA	10416541	Enox1	10559406	Tfpt	10343039	NA
10342134	NA	10496091	Lef1	10338432	NA	10505614	Tyrp1	10596275	Dnajc13	10339364	NA	10356267	A530032D15Rik	10341377	NA	10412900	Nkiras1	10399087	Ncapg2	10344509	NA	10340976	NA	10339307	NA	10343067	NA
10443120	NA	10348354	Ugt1a9	10491962	Foxo1	10440918	Tmem50b	10602739	Acot9	10573346	Mir24-2	10342623	NA	10341404	NA	10386005	Atp5f1	10477187	Tpx2	10339793	NA	10563170	Dkkl1	10342006	NA	10343092	NA
10342543	NA	10481585	Swi5	10542034	NA	10578149	Leprotl1	10454113	Dsg1a	10344325	NA	10340153	NA	10341411	NA	10388532	Nxn	10450605	Tubb5	10342825	NA	10421840	Wbp4	10451580	Bysl	10343169	NA
10347669	Inha	10571444	Slc7a2	10459802	NA	10428912	Fam84b	10342545	NA	10339907	NA	10512354	NA	10341415	NA	10575102	Cirh1a	10399659	NA	10343278	NA	10343431	NA	10592585	Sc5d	10343176	NA
10578066	NA	10339509	NA	10340935	NA	10425211	Gcat	10476740	Slc24a3	10338833	NA	10398693	Snora28	10341434	NA	10405811	Habp4	10408555	Wrnip1	10375229	Gm14702	10555401	NA	10448582	Mlst8	10343227	NA
10408225	Hist1h4c	10345442	Hs6st1	10439204	Rpl15	10576029	Cox4i1	10406171	Tppp	10343049	NA	10339287	NA	10341475	NA	10505282	Prpf4	10339180	NA	10343873	NA	10340959	NA	10410435	Papd7	10343235	NA
10344400	NA	10373577	Ormdl2	10552508	Klk7	10452854	Srd5a2	10511694	Osgin2	10341219	NA	10344055	NA	10341476	NA	10504849	Stx17	10338533	NA	10542894	NA	10365769	Hal	10574899	Nutf2	10343243	NA
10405211	Gadd45g	10427235	Prr13	10339339	NA	10473230	Nup35	10475051	Mga	10339783	NA	10430302	Csf2rb2	10341486	NA	10468722	Gfra1	10373756	Pla2g3	10342088	NA	10586591	Car12	10607848	Egfl6	10343292	NA
10476106	Snord57	10341605	NA	10376885	Snord49b	10508405	Tmem54	10410892	Rasa1	10342336	NA	10585284	NA	10341506	NA	10338654	NA	10548699	NA	10546659	NA	10465895	Fads2	10339510	NA	10343295	NA
10393917	Stra13	10593723	Acsbg1	10479362	Rps21	10342196	NA	10399465	Fam84a	10340532	NA	10339888	NA	10341548	NA	10344069	NA	10361375	Fbxo5	10343848	NA	10358490	Hmcn1	10340926	NA	10343358	NA
10416705	NA	10440467	NA	10341744	NA	10439018	0610012G03Rik	10459288	Adrb2	10400704	NA	10392010	Kansl1	10341558	NA	10481711	Stxbp1	10544763	Hoxa4	10398075	Serpina3n	10546685	Eif4e3	10338659	NA	10343374	NA
10409990	6720489N17Rik	10402835	Nudt14	10357369	Rpl27a	10606315	Taf9b	10344510	NA	10340768	NA	10559883	Vmn2r42	10341559	NA	10339814	NA	10369774	Nrbf2	10608711	Erdr1	10408928	Hspb1	10340093	NA	10343379	NA
10338272	NA	10576973	Col4a1	10340957	NA	10573790	Nod2	10455395	Spink5	10344239	NA	10338087	NA	10341563	NA	10501649	Rtca	10477924	Tgif2	10338409	NA	10371446	Bpifc	10364249	NA	10343386	NA
10571514	NA	10517053	Trnp1	10342011	NA	10343630	NA	10407467	Akr1e1	10344383	NA	10343886	NA	10341567	NA	10459389	Amd1	10587552	NA	10343897	NA	10517457	Rpl11	10581910	Tmem170	10343392	NA
10487447	Mall	10557951	Armc5	10338242	NA	10469954	Tmem203	10457920	Rps25	10338287	NA	10339026	NA	10341673	NA	10524941	Fbxo21	10568714	Mki67	10442083	Mirlet7e	10419854	Slc7a8	10415660	Rpl13	10343422	NA
10469138	4930412O13Rik	10339954	NA	10409014	NA	10598626	Tspan7	10437210	Bace2	10344213	NA	10429455	Hmgb1	10341685	NA	10394082	Ogfod3	10587637	Tbx18	10342048	NA	10477169	Id1	10338901	NA	10343434	NA
10581363	Cenpt	10339209	NA	10429564	Ly6a	10440091	Col8a1	10340053	NA	10338250	NA	10340089	NA	10341726	NA	10376060	Irf1	10443089	Syngap1	10342555	NA	10431410	Mapk11	10343988	NA	10343451	NA
10530759	Ube2n	10572932	Naa20	10343410	NA	10503995	Dnaja1	10341789	NA	10341090	NA	10340709	NA	10341745	NA	10607933	Hccs	10462796	Kif11	10338488	NA	10342804	NA	10390237	Atp5g1	10343521	NA
10404593	NA	10534343	Eln	10511629	Gm10136	10515253	Uqcrh	10410328	Zfp874b	10341470	NA	10338930	NA	10341749	NA	10342525	NA	10343031	NA	10342894	NA	10448182	Mir703	10408044	Cox5b	10343570	NA
10467124	Acta2	10339344	NA	10578251	NA	10385716	0610009B22Rik	10338198	NA	10340973	NA	10340527	NA	10341762	NA	10382852	Mfsd11	10569181	Lrdd	10344070	NA	10338855	NA	10341443	NA	10343571	NA
10440419	Btg3	10607646	Nhs	10587683	Bcl2a1a	10581824	Fa2h	10342711	NA	10344004	NA	10342228	NA	10341807	NA	10343253	NA	10510859	Megf6	10343130	NA	10510215	Gm13139	10375497	NA	10343572	NA
10525487	NA	10504106	Il11ra1	10344268	NA	10341727	NA	10471721	Ptgs1	10339056	NA	10343543	NA	10341809	NA	10541721	Spsb2	10404028	Hist1h3g	10341281	NA	10338205	NA	10340082	NA	10343617	NA
10448079	NA	10526217	Rfc2	10468239	Cyp17a1	10515983	Exo5	10513472	Mup2	10340284	NA	10339661	NA	10341822	NA	10515943	Ctps	10449148	Wfikkn1	10342802	NA	10340917	NA	10343135	NA	10343661	NA
10341834	NA	10339862	NA	10394971	Klf11	10391685	Fam171a2	10390831	Krt10	10338704	NA	10343506	NA	10341839	NA	10591816	Dpy19l1	10507112	Stil	10339448	NA	10358637	Hmcn1	10364030	Adora2a	10343672	NA
10608342	NA	10528929	Hadha	10441740	Agpat4	10586176	Snapc5	10340237	NA	10342513	NA	10338977	NA	10341841	NA	10388227	Cyb5d2	10582501	Fanca	10343536	NA	10413609	Mustn1	10357579	Mapkapk2	10343787	NA
10416271	Mir320	10489759	Sulf2	10476441	Rpl29	10453062	Atl2	10343602	NA	10342109	NA	10462535	Pten	10341853	NA	10461334	Mta2	10546163	Mcm2	10366275	NA	10469151	Itih5	10503643	Ndufaf4	10343819	NA
10341947	NA	10436304	Abi3bp	10400581	Fkbp3	10501235	Gstm4	10340320	NA	10342873	NA	10343529	NA	10341894	NA	10497490	NA	10478355	Mybl2	10600131	Xlr4b	10375751	Adamts2	10359446	Suco	10343831	NA
10513181	Gapdh	10365590	Ccdc53	10390505	Snora21	10340725	NA	10343665	NA	10375121	NA	10479228	Etohi1	10341914	NA	10478424	Ywhab	10411739	Ccnb1	10555087	NA	10358609	Hmcn1	10418038	Zfp503	10343857	NA
10444008	Zfp414	10374083	Aebp1	10362593	Npm1	10543959	Ptn	10539486	Zfml	10341445	NA	10341703	NA	10341918	NA	10456988	Pard6g	10437945	Mcm4	10355105	NA	10526559	Ache	10341328	NA	10343871	NA
10457922	Rpl29	10465649	Mark2	10532709	NA	10450055	H2-Ke2	10514520	Cyp2j9	10338385	NA	10400405	Nfkbia	10341925	NA	10412177	Skiv2l2	10515431	Kif2c	10344061	NA	10338524	NA	10339990	NA	10343910	NA
10489053	NA	10446553	Epb4.1l3	10339973	NA	10524417	Iscu	10513497	Mup2	10383206	NA	10341650	NA	10341977	NA	10385966	Anxa6	10408083	Hist1h3g	10500543	Hmgb1	10342304	NA	10415693	Shisa2	10343952	NA
10503399	Myl6	10343965	NA	10490203	Gnas	10511429	Car8	10365817	Ntn4	10402560	A130014H13Rik	10547469	NA	10342008	NA	10532753	Coro1c	10474875	Casc5	10338525	NA	10361282	Cr1l	10511136	B930041F14Rik	10344028	NA
10338208	NA	10343200	NA	10499941	Kprp	10571399	Zdhhc2	10341595	NA	10340339	NA	10344152	NA	10342031	NA	10531286	Vdac2	10431915	Slc38a4	10455653	NA	10358597	Hmcn1	10341346	NA	10344048	NA
10424250	Snrpd2	10466110	Ms4a10	10510176	Gm13034	10561854	Tbcb	10416340	Gfra2	10340892	NA	10423271	NA	10342035	NA	10394674	Socs2	10444605	Vars	10411839	Srek1	10370931	Mknk2	10355806	Tuba4a	10344065	NA
10339486	NA	10446821	Rps6	10563338	Ppp1r15a	10400023	Tspan13	10429573	Ly6c2	10338183	NA	10339155	NA	10342042	NA	10384138	Tmed4	10563883	Depdc1a	10340510	NA	10338523	NA	10340072	NA	10344084	NA
10548892	Arhgdib	10366446	Tspan8	10406939	NA	10377822	Med11	10342828	NA	10550501	Mill2	10357488	Cd55	10342055	NA	10606186	Slc16a2	10362672	NA	10339278	NA	10356568	Rab17	10450189	Btnl5	10344112	NA
10544756	Hoxa3	10576216	Snord68	10582464	NA	10481092	Agpat2	10404975	Id4	10342803	NA	10504194	Gm13306	10342066	NA	10517600	Pink1	10404127	Hist1h2aa	10340408	NA	10597758	Csrnp1	10339746	NA	10344151	NA
10494753	NA	10505512	Trim32	10492953	NA	10451220	Mad2l1bp	10592705	Pou2f3	10374350	NA	10551293	Cyp2f2	10342084	NA	10558001	Inpp5f	10495933	4930422G04Rik	10540028	Klf15	10339707	NA	10549582	Tsen34	10344165	NA
10555041	Alg8	10341420	NA	10342202	NA	10505276	Slc31a1	10342223	NA	10375123	NA	10352448	Dusp10	10342114	NA	10449225	Decr2	10575596	NA	10342742	NA	10527051	Sdk1	10438109	Ube2l3	10344175	NA
10544610	Igf2bp3	10436519	Robo1	10415604	Gjb2	10436766	Krtap20-2	10546421	Prickle2	10339796	NA	10366153	Rassf9	10342127	NA	10559385	Mrgprf	10559649	Cox6b2	10378649	Slc43a2	10341246	NA	10422052	Commd6	10344302	NA
10581569	Rpl29	10434672	Gng5	10341601	NA	10406877	Serf1	10593668	Dmxl2	10342247	NA	10491623	4932438A13Rik	10342138	NA	10463951	Smc3	10344025	NA	10338557	NA	10339337	NA	10395739	Srp54b	10344333	NA
10381260	Tubg2	10340987	NA	10403508	NA	10382435	Gprc5c	10407120	Rps3a1	10339974	NA	10534667	Serpine1	10342146	NA	10339411	NA	10359859	NA	10338326	NA	10440522	Adamts1	10341002	NA	10344353	NA
10381960	NA	10365290	Chst11	10350753	Glul	10340693	NA	10434302	Klhl24	10471814	Gpr21	10493889	Lce1c	10342184	NA	10591726	Ecsit	10563780	E2f8	10344161	NA	10338951	NA	10338371	NA	10344389	NA
10464551	Ndufs8	10458906	Ppic	10408008	NA	10386058	Sparc	10587534	Bckdhb	10560481	Fosb	10459669	Rpl5	10342226	NA	10586405	Spg21	10568731	NA	10512594	Msmp	10344613	NA	10458428	Uxt	10344402	NA
10458086	Gm10548	10570634	4930467E23Rik	10409968	Rps18	10508727	Dnajc8	10586816	Sltm	10460070	Zfp407	10338193	NA	10342258	NA	10396896	Slc39a9	10408239	Hist1h3f	10340805	NA	10378833	Ssh2	10396694	Churc1	10344522	NA
10590888	Gm7520	10511363	Penk	10417912	Usp54	10571344	D8Ertd82e	10394954	Grhl1	10342267	NA	10557009	Eef2k	10342260	NA	10352905	Cd34	10342462	NA	10381063	Wipf2	10342881	NA	10466104	Ccdc86	10344573	NA
10343440	NA	10508651	Sdc3	10339116	NA	10389719	Scpep1	10340079	NA	10421970	NA	10463209	4933411K16Rik	10342329	NA	10420155	Dhrs1	10561073	Tmem91	10438069	Ypel1	10404132	Cmah	10519266	Mir200a	10344577	NA
10341003	NA	10343885	NA	10417920	Usp54	10341939	NA	10512949	Abca1	10340851	NA	10341872	NA	10342351	NA	10424213	Zhx2	10521709	Lap3	10342232	NA	10512739	Xpa	10444717	D17H6S53E	10344587	NA
10597513	NA	10572613	Mrpl34	10341725	NA	10357084	Serpinb3b	10506989	Faf1	10338829	NA	10338431	NA	10342363	NA	10383671	Drg1	10573578	BC056474	10341241	NA	10361771	Plagl1	10407940	Trgv2	10344597	NA
10343486	NA	10551736	Ppp1r14a	10603649	NA	10439303	Casr	10341008	NA	10439321	Slc15a2	10547638	Rpl15	10342406	NA	10477815	Phf20	10467637	Arhgap19	10338570	NA	10394800	Bnip3l	10563441	Emp3	10344603	NA
10584276	Sec61g	10403052	NA	10342535	NA	10547531	Bid	10428796	Fbxo32	10538187	Gpnmb	10339696	NA	10342420	NA	10342515	NA	10450519	Tcf19	10512063	NA	10575497	Mtss1l	10343920	NA	10344624	Lypla1
10559702	Zfp579	10477630	Dynlrb1	10460259	Aldh3b2	10450154	H2-Aa	10341961	NA	10338162	NA	10343396	NA	10342432	NA	10341395	NA	10343339	NA	10344370	NA	10388086	Nlrp1c-ps	10549097	Ldhb	10344750	Sgk3
10404051	Hist1h4d	10341910	NA	10525955	Fzd10	10381311	Wnk4	10341413	NA	10338481	NA	10342571	NA	10342452	NA	10343248	NA	10499366	Pmf1	10500089	NA	10432831	Krt73	10340495	NA	10344799	Cspp1
10552516	Klk6	10344807	Cspp1	10458709	Gm94	10537123	Lrguk	10342399	NA	10342820	NA	10572456	NA	10342453	NA	10342660	NA	10361110	Dtl	10342412	NA	10339687	NA	10379344	NA	10344809	Cspp1
10466843	NA	10499160	Cd1d1	10342164	NA	10340853	NA	10447521	Tfb1m	10339708	NA	10340096	NA	10342477	NA	10554945	Prcp	10505374	Col27a1	10552425	Vsig10l	10496438	Adh1	10478012	Ube2i	10344817	Cspp1
10364375	Cstb	10342290	NA	10364593	Cnn2	10398455	Ppp2r5c	10338670	NA	10339864	NA	10344064	NA	10342550	NA	10511069	Gnb1	10399005	Crip1	10342050	NA	10523766	Lrrc8c	10586168	Snord16a	10344939	Terf1
10377541	Lsmd1	10480345	NA	10543273	Cttnbp2	10461022	Ppp1r14b	10358589	Hmcn1			10508721	Snora44	10342591	NA	10594460	Dis3l	10446027	Chaf1a	10520388	Rbm33	10358585	Hmcn1	10388154	Med31	10345016	Tfap2b
10444756	Atp6v1g2	10344417	NA	10462039	Trpm3	10394770	Odc1	10453636	Svil			10338948	NA	10342598	NA	10342696	NA	10507692	Edn2	10582580	NA	10527327	Bri3	10339071	NA	10345404	C230030N03Rik
10598085	NA	10359201	Ralgps2	10394609	Rpl36	10499504	Mtx1	10368030	Heca			10341337	NA	10342616	NA	10457780	Garem	10369815	Cdk1	10490838	Fabp5	10358551	Hmcn1	10338231	NA	10345552	NA
10459109	Tcof1	10455942	A730017C20Rik	10338791	NA	10423556	Cpq	10342239	NA			10344050	NA	10342654	NA	10341793	NA	10481259	Col5a1	10602307	Ott	10342170	NA	10527970	Gtpbp10	10345666	Pdcl3
10373768	Selm	10554057	Adamts17	10456184	Apcdd1	10341690	NA	10354111	Aff3			10542722	Rps25	10342659	NA	10473097	Plekha3	10338662	NA	10416923	NA	10538275	Nfe2l3	10444927	Nrm	10345904	AI597479
10338992	NA	10338463	NA	10341950	NA	10597461	Cmtm7	10483381	Stk39			10342345	NA	10342703	NA	10343801	NA	10343388	NA	10450920	AY036118	10486197	Rhov	10578027	Mak16	10345913	Nck2
10404045	Hist1h2ao	10343507	NA	10366522	Rpl29	10425207	H1f0	10395692	Arhgap5			10343034	NA	10342712	NA	10478077	Ralgapb	10339390	NA	10345704	NA	10502745	Rpl11	10434224	NA	10345930	Tpp2
10491062	Rpl27a	10383887	Uqcr10	10338251	NA	10568040	Ppp4c	10340421	NA			10342016	NA	10342724	NA	10346634	Nop58	10522784	NA	10339218	NA	10340838	NA	10340258	NA	10345981	Ercc5
10408243	Hist1h4b	10442493	NA	10346328	NA	10379030	Fam222b	10338758	NA			10343832	NA	10342755	NA	10375941	Vdac1	10552249	Gm6795	10339853	NA	10339124	NA	10345368	NA	10346074	Wdr75
10408072	Hist1h2ao	10338395	NA	10500376	Rpl21	10341693	NA	10461389	Rps7			10340055	NA	10342757	NA	10407211	Ppap2a	10608658	Ost4	10436890	NA	10357155	Inhbb	10343981	NA	10346564	Casp8
10387316	Chd3	10342645	NA	10338475	NA	10391669	Slc25a39	10338906	NA			10606495	Pof1b	10342861	NA	10476702	Sec23b	10521090	Tacc3	10491595	4932438A13Rik	10341998	NA	10471411	Ptges2	10346611	Gm973
10512279	Cntfr	10358991	BC034090	10603833	Usmg5	10367973	Aig1	10494288	Golph3l			10342961	NA	10342923	NA	10376889	Mmgt2	10408118	Hist1h2ao	10492888	NA	10471844	Nek6	10343575	NA	10346651	Bmpr2
10601471	NA	10493259	Ssr2	10338491	NA	10398124	Gskip	10339607	NA			10343720	NA	10342966	NA	10497390	Armc1	10507101	Trabd2b	10338388	NA	10343900	NA	10575326	NA	10346764	Abi2
10364373	Lsm7	10384448	Sec61g	10454097	Rpl11	10343159	NA	10344232	NA			10576971	Irs2	10342971	NA	10345423	Plekhb2	10421877	Diap3	10339372	NA	10362073	Sgk1	10483626	Dlx2	10346943	Creb1
10503617	Mms22l	10338123	NA	10411226	F2rl1	10545458	Tcf7l1	10343024	NA			10342749	NA	10343015	NA	10498095	Cog6	10419296	Wdhd1	10342339	NA	10463263	Lztfl1	10344433	NA	10347232	Xrcc5
10513536	Gm2173	10341691	NA	10344601	NA	10538855	NA	10340659	NA			10371275	Rpl23a	10343020	NA	10591947	Acad8	10487577	Ckap2l	10601088	NA	10412038	Zswim6	10338687	NA	10347254	Smarcal1
10398350	Mir341	10444298	H2-Eb1	10505438	Orm1	10343924	NA	10500976	Rap1a			10341435	NA	10343033	NA	10408600	Serpinb6a	10365337	NA	10338279	NA	10493834	Pglyrp4	10342126	NA	10347862	Mff
10342234	NA	10489535	Wfdc3	10341971	NA	10508465	Marcksl1	10480329	Dnajc1			10344153	NA	10343053	NA	10352756	Lpgat1	10559818	NA	10585699	Fabp5	10339193	NA	10451458	Cnpy3	10348456	Cops8
10340115	NA	10357808	Snrpe	10370522	Casp14	10547404	Erc1	10568529	Ikzf5			10435787	NA	10343091	NA	10464924	Rab1b	10542231	Prh1	10342854	NA	10571288	Gtf2e2	10427045	9430023L20Rik	10348817	2002-09-01
10562647	Rpl29	10481272	1700007K13Rik	10606255	Gm12191	10452485	Rab31	10340922	NA			10490770	NA	10343111	NA	10371432	D10Wsu52e	10357790	Sox13	10458303	Ecscr	10358553	Hmcn1	10570131	Ing1	10348932	Gin1
10344202	NA	10549546	Ndufa3	10429568	Ly6c1	10475378	Casc4	10471978	Epc2			10502565	Clca2	10343126	NA	10458033	Stard4	10607398	NA	10340826	NA	10523021	Slc4a4	10583519	Icam1	10349016	2310035C23Rik
10548857	Hist4h4	10395553	Nrcam	10339923	NA	10341290	NA	10566258	NA			10602221	Mir680-2	10343139	NA	10375065	Sh3pxd2b	10511298	9430015G10Rik	10343000	NA	10344803	Cspp1	10475360	Mrpl51	10349049	Zfp706
10422234	NA	10457071	Cyb5	10523231	Art3	10508089	Mrps15	10522782	Rpl7			10412258	NA	10343150	NA	10381860	Mettl2	10404049	Hist1h3d	10342766	NA	10401172	Vti1b	10574204	Arl2bp	10349239	Mki67ip
10339306	NA	10520467	Hadhb	10515694	Szt2	10339463	NA	10502655	Cyr61			10340350	NA	10343191	NA	10521913	Rbpj	10492679	4930579G24Rik	10341936	NA	10562576	Plekhf1	10340606	NA	10349442	Ccnt2
10601356	Cox7b	10460765	Lamtor1	10362359	Pebp1	10475264	Ccndbp1	10440238	Nsun3			10555389	Ucp2	10343250	NA	10462363	Jak2	10339568	NA	10339456	NA	10526085	NA	10445627	2310039H08Rik	10349512	Ubxn4
10404026	Hist1h2af	10565813	Snord15a	10338740	NA	10603706	Med4	10342624	NA			10431659	Kif21a	10343277	NA	10345608	Unc50	10339944	NA	10342668	NA	10523297	Ccng2	10554704	Mesdc2	10350024	Klhl12
10436203	NA	10343601	NA	10452202	Acer1	10469046	Phyh	10340116	NA			10342313	NA	10343288	NA	10468311	Sh3pxd2a	10403978	Hist1h2br	10342625	NA	10362811	Sesn1	10535043	Pdgfa	10350478	Glrx2
10340003	NA	10458334	Pfdn1	10364091	NA	10483756	Atp5g3	10351206	Selp			10604240	Rpl17	10343301	NA	10390473	Pip4k2b	10449303	Bak1	10341202	NA	10339998	NA	10381018	Msl1	10350535	Tpr
10339872	NA	10340325	NA	10385570	Gm12191	10413803	Btd	10528457	Orc5			10344255	NA	10343400	NA	10565689	Capn5	10548752	NA	10338645	NA	10411519	Map1b	10588642	Nprl2	10351026	Gas5
10591881	Hmgb1	10338329	NA	10594186	NA	10457888	Tpgs2	10340785	NA			10372656	Cpsf6	10343429	NA	10585249	Ppp2r1b	10517081	NA	10341360	NA	10399908	Prkar2b	10531208	Cox18	10351623	F11r
10555548	Mir139	10342915	NA	10473367	Slc43a1	10413874	Ogdhl	10343118	NA			10338349	NA	10343452	NA	10404359	Mboat1	10376459	NA	10590071	Mir26a-1	10607865	Tmsb4x	10341644	NA	10351738	Pex19
10566922	NA	10603151	Gpm6b	10377439	Per1	10534426	Fzd9	10409021	Tpmt			10344472	NA	10343453	NA	10432527	Cers5	10532628	Myo18b	10450482	NA	10399677	Cox7a2l	10567657	Ndufab1	10351749	Dcaf8
10339169	NA	10362896	Cd24a	10560103	Rps8	10341238	NA	10355312	Ikzf2			10338845	NA	10343482	NA	10341740	NA	10339484	NA	10444589	Hspa1a	10362674	Rnu3a	10375886	D930048N14Rik	10352066	Sdccag8
10342447	NA	10508142	Col8a2	10343038	NA	10496621	Gtf2b	10440661	Rpl13			10345762	Il1r1	10343491	NA	10462587	Stambpl1	10594774	Ccnb2	10340694	NA	10340034	NA	10339760	NA	10352194	Cdc42bpa
10339965	NA	10549700	Suv420h2	10462575	Lipm	10475211	Haus2	10339753	NA			10373519	Rpl12	10343502	NA	10365242	Hcfc2	10443047	Kifc5b	10339415	NA	10394593	Fam49a	10440344	Robo2	10352459	Rab3gap2
10447023	Heatr5b	10377725	Dlg4	10398599	Rps19	10358978	Ier5	10487405	Prom2			10580183	Ier2	10343517	NA	10518805	Vamp3	10497831	Ccna2	10343559	NA	10341031	NA	10497199	Gm6194	10352514	Eprs
10391488	Rnu2-10	10423471	Ctnnd2	10574013	Mt4	10377982	Kif1c					10579066	NA	10343553	NA	10407145	Mier3	10494781	Igsf3	10340028	NA	10397068	Rbm25	10483163	Grb14	10352947	Mrpl15
10342413	NA	10526972	Nudt1	10343562	NA	10340956	NA					10341954	NA	10343564	NA	10440800	Urb1	10371770	Gas2l3	10344443	NA	10411915	Ppwd1	10343577	NA	10353028	Vcpip1
10444991	Gm6034	10516221	NA	10526838	Got2	10358668	Hmcn1					10339732	NA	10343585	NA	10494023	Rorc	10389134	Slfn9	10425799	Rnu12	10600597	Tmem47	10339957	NA	10353050	Cops5
10489127	Rbl1	10494643	Hmgcs2	10600718	Sec61g	10457606	Kctd1					10504491	Zcchc7	10343649	NA	10368739	Gtf3c6	10342079	NA	10578681	NA	10578377	Frg1	10518774	Park7	10353064	Arfgef1
10546088	H1fx	10338681	NA	10343809	NA	10344279	NA					10578123	Rbpms	10343666	NA	10522009	Pgm1	10453715	NA	10339158	NA	10340605	NA	10363860	Slc16a9	10353167	Tram1
10491897	NA	10365219	Gm4924	10343603	NA	10472757	Cybrd1					10339490	NA	10343687	NA	10344447	NA	10449242	Snrpg	10342942	NA	10486107	Srp14	10432162	Kansl2	10353272	Stau2
10340176	NA	10589327	Ucn2	10338196	NA	10476395	Bmp2					10343362	NA	10343700	NA	10372917	Tmem5	10515836	Ccnb1	10366043	Dusp6	10449807	Ephx3	10344077	NA	10353296	Tceb1
10437451	Ubald1	10450819	Znrd1	10457203	NA	10539159	Suclg1					10340918	NA	10343703	NA	10352119	Desi2	10489346	NA	10340882	NA	10478698	Eya2	10550632	Opa3	10353533	Smap1
10408092	Hist1h4n	10502191	Ostc	10515704	Szt2	10581538	Nqo1					10578222	Dlc1	10343730	NA	10400941	Dhrs7	10455813	Lmnb1	10338461	NA	10339635	NA	10551638	Lgals7	10353689	Phf3
10427391	Ewsr1	10551716	Ggn	10341752	NA	10342358	NA					10338157	NA	10343732	NA	10578521	Snx25	10374426	Pno1	10343756	NA	10601473	Apool	10371230	Gna11	10353754	Zfp451
10351515	Rnu1b1	10448355	Kremen2	10421707	Rpl23a	10443021	Atp6v0e					10342097	NA	10343779	NA	10342973	NA	10558263	Gm10584	10338748	NA	10341797	NA	10381603	Fzd2	10353871	Lman2l
10545372	Atoh8	10341731	NA	10339301	NA	10544563	Zfp467					10455210	Rpl17	10343783	NA	10546079	Cnbp	10403948	Hist1h2be	10599433	NA	10476775	Naa20	10559673	Tmem238	10354079	Txndc9
10444778	NA	10528664	Smarcd3	10338627	NA	10486988	Duoxa1					10533720	Niacr1	10343786	NA	10385375	Thg1l	10497122	Depdc1a	10341058	NA	10420957	Ptk2b	10507908	Fhl3	10354220	Mfsd9
10348664	Mir149	10343232	NA	10434808	Tprg	10524676	Srsf9					10502638	Clca5	10343846	NA	10347552	Stk16	10527801	Brca2	10339081	NA	10409464	Dbn1	10346607	Fzd7	10354286	Kdelc1
10443087	NA	10457924	Bloc1s1	10427402	Ghr	10376832	Adora2b					10491601	4932438A13Rik	10343858	NA	10417708	Oxsm	10372091	Anapc15	10342476	NA	10464601	NA	10398173	Vrk1	10354307	Txn1
10608719	Plekhn1	10342298	NA	10443854	Cyp4f39	10564713	Mfge8					10343755	NA	10343888	NA	10395058	Adi1	10402721	Xrcc3	10339527	NA	10341600	NA	10540785	Brk1	10354555	Asnsd1
10576235	Dpep1	10512701	Tomm5	10338394	NA	10340121	NA					10393406	NA	10343931	NA	10507557	Ebna1bp2	10539705	Snrpg	10340439	NA	10339046	NA	10537179	Bpgm	10354832	Ppil3
10569341	H19	10401114	Rab15	10439762	Ahcy	10367436	Cd63					10342760	NA	10343947	NA	10338964	NA	10343631	NA	10342448	NA	10358523	Hmcn1	10596454	Alas1	10355141	Klf7
10341364	NA	10338462	NA	10344266	NA	10355246	Acadl					10343868	NA	10343975	NA	10340929	NA	10539449	Atp6v1b1	10415873	Mir598	10343594	NA			10355147	Mettl21a
10373143	Mbd6	10483786	Mrpl23	10344461	NA	10512774	Coro2a					10338530	NA	10344014	NA	10410115	Aaed1	10548661	NA	10339828	NA	10342099	NA			10355534	Tns1
10409118	Wnk2	10342730	NA	10503259	Trp53inp1	10354374	Slc40a1					10338590	NA	10344019	NA	10425421	Fam83f	10403943	Hist1h2bm	10519667	NA	10499705	Hax1			10355628	Rnf25
10515688	Szt2	10338720	NA	10457707	Dsc1	10564869	Cib1					10340434	NA	10344067	NA	10344017	NA	10470462	Col5a1	10513139	Ptpn3	10338817	NA			10355785	Glb1l
10340120	NA	10342149	NA	10551264	Cyp2b19	10439542	Zdhhc23					10474229	Cd59a	10344073	NA	10458823	Tmed7	10338993	NA	10340523	NA	10343688	NA			10355931	Farsb
10338552	NA	10450646	Rbx1	10338434	NA	10338853	NA					10343180	NA	10344081	NA	10342635	NA	10343465	NA	10512327	4933409K07Rik	10436442	Fam60a			10355974	Wdfy1
10562736	1700028J19Rik	10342599	NA	10361897	Ifngr1	10571978	Cbr4					10344157	NA	10344083	NA	10456904	Pstpip2	10398404	Mir667	10603736	Rnu2-10	10469936	Nrarp			10356001	Cul3
10339251	NA	10374464	Spred2	10510574	Errfi1	10339652	NA					10338433	NA	10344096	NA	10499766	Slc27a3	10579262	Crtc1	10338789	NA	10344003	NA			10356312	Ncl
10564777	Kif7	10521725	Med28	10341357	NA	10489912	Tmem189					10343403	NA	10344129	NA	10342839	NA	10366544	Kifc5c-ps	10339256	NA	10516789	Ptpru			10356423	Usp40
10342200	NA	10579296	2810428I15Rik	10341433	NA	10338423	NA					10341640	NA	10344148	NA	10546891	Camk1	10591781	Anln	10586166	NA	10544523	Rny1			10356859	Dtymk
10406581	Dhfr	10340387	NA	10608689	Rs5-8s1	10390542	Cacnb1					10548817	Plbd1	10344192	NA	10499847	Chtop	10515939	Foxo6	10339695	NA	10436196	NA			10356936	Ppip5k2
10493555	Kcnn3	10340278	NA	10338232	NA	10536895	Atp6v1f					10453676	NA	10344196	NA	10517243	Pdik1l	10404885	Gmpr	10340517	NA	10358603	Hmcn1			10357191	Ptpn4
10341052	NA	10500356	Rnu1b1	10349562	AA986860	10455578	Commd10					10593225	Zbtb16	10344203	NA	10376596	Gid4	10425890	Arhgap8	10339205	NA	10417676	Thoc7			10357454	Dars
10383025	C1qtnf1	10551273	Cyp2g1	10338103	NA	10592099	Dcps					10341186	NA	10344262	NA	10539143	Retsat	10414920	NA	10541260	Cecr2	10342768	NA			10357773	Mdm4
10339311	NA	10400143	Stxbp6	10358389	Rgs2	10436471	Cggbp1					10343944	NA	10344274	NA	10368092	Hebp2	10338404	NA	10340223	NA	10405911	Zfp759			10358050	Timm17a
10529656	Nsg1	10445688	Ccnd3	10502898	Ube2l3	10449644	Glo1					10343398	NA	10344300	NA	10354732	Hspd1	10464917	Cnih2	10439126	NA	10526181	Gatsl2			10358191	Camsap2
10342262	NA	10368883	Tdg	10556266	Wee1	10588223	Anapc13					10342824	NA	10344354	NA	10416974	Gpc6	10343994	NA	10339969	NA	10400635	Rps29			10358531	Hmcn1
10476192	Oxt	10452890	Tceb2	10340171	NA	10351131	Myoc							10344375	NA	10364280	Pttg1ip	10534974	Mcm7	10343484	NA	10518335	Znf41-ps			10358537	Hmcn1
10585840	Cd276	10340537	NA	10344404	NA	10515337	Nasp							10344378	NA	10415885	Sox7	10342796	NA	10547621	Apobec1	10381872	Tlk2			10358539	Hmcn1
10500329	Hist2h2aa1	10358519	Hmcn1	10515134	Skint9	10417759	Ube2e2							10344434	NA	10545471	Kcmf1	10408077	Hist1h2ak	10340250	NA	10538684	Tigd2			10358577	Hmcn1
10474687	NA	10342328	NA	10492682	Fam198b	10448004	Phf10							10344444	NA	10428211	Zfp706	10500100	Tnfaip8l2	10391061	Krt16	10462670	Rpp30			10358698	Rnf2
10343284	NA	10342450	NA	10408074	Hist1h4b	10498620	Trim59							10344478	NA	10428707	Has2	10339215	NA	10400892	NA	10340226	NA			10358709	Cox7b
10343237	NA	10593035	Tmprss4	10454731	NA	10340656	NA							10344482	NA	10593159	Pafah1b2	10448506	Ccnf	10591614	Dock6	10514255	Mllt3			10358849	Dhx9
10355528	Tns1	10342284	NA	10344215	NA	10392449	Wipi1							10344486	NA	10413502	Actr8	10603860	Cfp	10410654	NA	10338109	NA			10359734	Dcaf6
10543065	NA	10421670	NA	10460255	1700055N04Rik	10427807	Sub1							10344502	NA	10595604	Syncrip	10509168	E2f2	10576246	Rps12	10449926	Zfp799			10359982	Atf6
10540999	H2afz	10458183	Gfra3	10499412	Rab25	10446334	Glcci1							10344546	NA	10564849	2610034B18Rik	10478415	Wisp2	10587778	NA	10343371	NA			10360130	Nit1
10426150	Panx2	10376216	Slc36a1	10490078	Sumo1	10564211	Snrpn							10344550	NA	10547140	Tmcc1	10580484	Heatr3	10343317	NA	10343060	NA			10360227	Pea15a
10534441	Pom121	10338811	NA	10554814	Prss23	10550059	2310014L17Rik							10344614	NA	10349316	Tmem185b	10492426	Acsf2	10493335	5830417I10Rik	10493794	S100a14			10360544	Hnrnpu
10414805	NA	10495854	Prss12	10534583	NA	10436773	NA							10344719	NA	10341369	NA	10512236	Kif24	10338086	NA	10342352	NA			10360695	Nvl
10579600	NA	10339875	NA	10518329	Rpl28	10510700	Gpr153							10344743	3110035E14Rik	10339349	NA	10340259	NA	10556463	Arntl	10457872	Slc39a6			10360764	Enah
10538638	NA	10442321	Hcfc1r1	10444883	Cdsn	10465804	Polr2g							10345190	Lgsn	10601771	Armcx1	10550102	Lig1	10342173	NA	10358581	Hmcn1			10360789	Degs1
10580231	NA	10534301	Syna	10517401	Grhl3	10343728	NA							10345203	Paox	10342929	NA	10382998	Birc5	10598087	NA	10499870	Lor			10360806	Capn2
10340744	NA	10434743	NA	10367744	NA	10344425	NA							10345352	NA	10585970	Myo9a	10339239	NA	10342782	NA	10595480	Me1			10360983	Pdcd5
10341575	NA	10511309	Rnf223	10339500	NA	10538640	Abcg2							10345370	Ptpn18	10342148	NA	10474825	Knstrn	10340689	NA	10432780	Krt6a			10361078	Tatdn3
10340335	NA	10348537	Ramp1	10338859	NA	10338515	NA							10345440	NA	10467489	Ptp4a1	10338350	NA	10341210	NA	10416793	Uchl3			10361270	Cd46
10352356	Haus5	10485633	NA	10587266	Gclc	10342334	NA							10345546	NA	10400546	Fbxo33	10598238	NA	10508972	Gm5589	10358587	Hmcn1			10361712	Shprh
10517566	NA	10343926	NA	10471586	Hspa5	10342484	NA							10346069	NA	10470948	Slc39a1	10339533	NA	10434283	NA	10467088	Rpl9			10361760	Timm8a1
10533875	Ncor2	10480057	Rbm17	10562649	NA	10342847	NA							10347277	Igfbp2	10568017	Slx1b	10558596	Paox	10338505	NA	10339582	NA			10361956	Map7
10463687	Wbp1l	10343917	NA	10386418	NA	10538082	Atp6v0e2							10347497	Wnt10a	10455912	Isoc1	10532330	Ankle2	10439292	BC100530	10344024	NA			10361979	Bclaf1
10339186	NA	10576152	Trappc2l	10499952	Crct1	10490225	Slmo2							10347583	Des	10458583	Yipf5	10605055	Haus7	10598018	NA	10369615	Srgn			10362210	Med23
10425257	Polr2f	10595620	NA	10341097	NA	10338496	NA							10347860	NA	10425000	Lrrc14	10342478	NA	10421361	Bmp1	10342905	NA			10362314	Ptprk
10365127	2210404O07Rik	10578423	Gm9908	10602176	NA	10394990	Mboat2							10347921	NA	10412616	Rpp14	10341157	NA			10343565	NA			10362392	Psmd2
10355325	Bard1	10563114	Snord32a	10342709	NA	10342512	NA							10348070	Ncl	10396795	Eif2s1	10399470	Trib2			10342674	NA			10362596	Fyn
10344058	NA	10366597	Grip1	10340810	NA	10586306	Igdcc4							10348896	Gal3st2	10499425	2700060E02Rik	10572906	Mcm5			10338610	NA			10362633	Rev3l
10402316	Rpl29	10563112	Snord33	10398032	Serpina3b	10442752	Tsr3							10348910	Neu4	10430669	Rpl3	10338566	NA			10340696	NA			10362758	Zbtb24
10595046	NA	10382104	Snord104	10579657	Rpl23a	10535904	Hsph1							10349569	NA	10341831	NA	10410039	Ptch1			10557481	Ypel3			10363000	Gpx4
10404036	Hist1h2bg	10341007	NA	10434835	Leprel1	10344074	NA							10349872	NA	10338128	NA	10385335	NA			10498576	Lxn			10363163	Asf1a
10408200	Hist1h4f	10561025	Cnfn	10604342	Gm4987	10474867	NA							10349951	NA	10577528	Smim19	10604837	Sox3			10358595	Hmcn1			10363178	Npm1
10445241	Tnfrsf21	10547740	C1s	10344118	NA	10381298	Ramp2							10350077	Syt2	10439985	Trmt10c	10375732	NA			10340586	NA			10363241	Gcc2
10557111	Scnn1g	10372988	Slc16a7	10344835	NA	10458663	Dpysl3							10350128	Nav1	10339283	NA	10341646	NA			10542156	Clec2d			10363703	Jmjd1c
10339037	NA	10534168	Auts2	10344063	NA	10473118	Ube2e3							10350197	NA	10404407	Foxc1	10369748	NA			10554569	Fam103a1			10363903	Hbs1l
10342163	NA	10542520	Atp5h	10412978	1810062O18Rik	10344362	NA							10350689	Ncf2	10385495	Cdk2ap1	10407356	Nnt			10494016	Them5			10364011	Specc1l
10431962	Endou	10342360	NA	10534059	Rps2	10341657	NA							10351056	Ankrd45	10502405	Metap1	10410741	Mctp1			10338256	NA			10364051	Snrpd3
10343116	NA	10343035	NA	10545101	Hpgds	10417605	Fhit							10351136	NA	10497487	NA	10340466	NA			10339101	NA			10364696	Atp5d
10384229	NA	10552418	Etfb	10544417	Epha1	10509127	Fuca1							10351473	Sh2d1b2	10339140	NA	10598159	NA			10375216	Pank3			10364744	Ndufs7
10518967	Smim1	10481627	Lcn2	10430447	Micall1	10392910	Hid1							10351603	Arhgap30	10354432	Myo1b	10343639	NA			10522976	Rufy3			10365716	Ikbip
10338216	NA	10514939	Podn	10447412	NA	10401128	Max							10351616	Usf1	10581061	Cmtm4	10339947	NA			10460157	Cpt1a			10366052	Kitl
10341124	NA	10343883	NA	10460253	Aldh3b2	10607004	Psmd10							10351689	NA	10467842	Got1	10491805	Plk4			10358533	Hmcn1			10366238	Ppp1r12a
10538338	Creb5	10551852	Clip3	10404262	Rps8	10339191	NA							10351961	Olfr417	10505894	Mtap	10525833	Atp6v0a2			10367282	Cnpy2			10366337	Nap1l1
10437483	Rogdi	10342829	NA	10477920	Myl9	10342918	NA							10352150	NA	10340769	NA	10408087	Hist1h2br			10439667	BC016579			10366409	Zfc3h1
10408094	Hist1h2ao	10348299	NA	10343112	NA	10381122	Fkbp10							10352192	Ahctf1	10555438	Fchsd2	10530257	NA			10576639	Nrp1			10367091	Naca
10340728	NA	10380501	Dlx3	10512606	Hint2	10340870	NA							10352292	NA	10344240	NA	10408210	Hist1h2bc			10341173	NA			10367100	Ptges3
10427468	NA	10571162	Eif4ebp1	10343189	NA	10576946	Lig4							10352548	Slc30a10	10383204	NA	10501903	Synpo2			10548879	Mgp			10367515	NA
10588026	Rpl7a	10398319	Dlk1	10338966	NA	10545014	Vopp1							10352957	Rgs20	10338684	NA	10341984	NA			10541885	Scnn1a			10367673	Plekhg1
10382492	Otop3	10407286	NA	10537909	Rny3	10508112	Lsm10							10352971	Rb1cc1	10492078	Alg5	10341633	NA			10405633	Ntrk2			10367728	Tab2
10393098	Wbp2	10342567	NA			10369989	Ddt							10353034	Snord87	10577792	Plekha2	10524790	Cit			10346330	Plcl1			10367960	Pex3
10460149	NA	10344282	NA			10509238	Htr1d							10353672	NA	10517883	Necap2	10600471	NA			10584674	Mcam			10368289	Enpp1
10530223	NA	10338219	NA			10391119	Leprel4							10354372	Myl6	10340168	NA	10343401	NA			10346164	Sdpr			10368612	Gapdh
10541482	Nhp2l1	10511333	Plag1			10588509	Pcbp4							10354576	Dnah7b	10432122	Asb8	10340342	NA			10340690	NA			10368616	Zufsp
10339479	NA	10509901	Mfap2			10343635	NA							10354777	Satb2	10497481	NA	10381072	Cdc6			10552526	Klk5			10369102	NA
10570008	B930078G14Rik	10343499	NA			10409314	Msx2							10355259	Myl1	10342436	NA	10456490	Cep192			10552311	NA			10369176	Tbc1d32
10391100	Atp5g1	10545479	Tmsb10			10348917	Fam174a							10355658	Fev	10356406	Ngef	10364319	NA			10342713	NA			10369252	2010-09-01
10453459	Pnkd	10342736	NA			10379840	Myo19							10355844	Dnpep	10359713	Sft2d2	10338871	NA			10594142	Rpl11			10369661	Ccar1
10408006	NA	10501222	Gstm2			10593789	Etfa							10356291	A530040E14Rik	10531133	Grsf1	10414736	NA			10341078	NA			10369704	Hnrnph3
10429520	Ly6d	10344200	NA			10342115	NA							10356353	Alppl2	10365227	Ap3m1	10426016	Gtse1			10597564	Cmc1			10369867	Tfam
10569296	Krtap5-2	10461071	2700081O15Rik			10461214	Tmem223							10356379	Ecel1	10535866	Ubl3	10342505	NA			10514366	Gm12669			10369877	Ube2d1
10343503	NA	10361767	Sf3b5			10561247	Shkbp1							10356510	Iqca	10491056	Tbl1xr1	10493858	Sprr2a1			10338363	NA			10370413	D10Jhu81e
10493108	Crabp2	10429081	Snrpc			10564818	Anpep							10356764	2310007B03Rik	10478754	Arfgef2	10562563	Ccne1			10442258	Zfp943			10370544	2610008E11Rik
10428302	Klf10	10376455	Hist3h2a			10341474	NA							10356876	NA	10453738	Fzd8	10341898	NA			10341086	NA			10371307	Nfyb
10352127	Cox20	10413710	Nt5dc2			10447551	Tmem242							10357222	Gm101	10509941	Rsg1	10391461	Brca1			10556208	Akip1			10371356	Appl2
10347218	NA	10340405	NA			10408677	Lyrm4							10357658	NA	10600502	Fam220a	10435581	Polq			10351588	Pvrl4			10371482	Hsp90b1
10369474	Eif4ebp2	10390701	Msl1			10562856	Myh14							10357788	Ppp1r15b	10394560	Smc6	10586614	C2cd4b			10508879	Fam46b			10371877	Slc25a3
10573427	NA	10599333	Atp5l			10493267	Arhgef2							10358177	5730559C18Rik	10569494	Tnfrsf22	10343098	NA			10408613	Tubb2b			10371904	1110012L19Rik
10342570	NA	10552964	Ftl1			10510286	Mad2l2							10358224	Ptprc	10339589	NA	10513943	NA			10407870	Mrpl32			10371987	Metap2
10414154	Mir346	10342032	NA			10508376	Trim62							10359303	NA	10593384	Dixdc1	10608706	Sap25			10474467	Muc15			10372078	Mrpl42
10340269	NA	10595636	NA			10538408	2410066E13Rik							10359861	Mgst3	10502205	Hadh	10591369	Dnmt1			10523541	Mrps18c			10372082	Nudt4
10339300	NA	10342486	NA			10548163	Tulp3							10359888	NA	10518031	Dnajc16	10341786	NA			10474700	Thbs1			10372503	Lgr5
10341275	NA	10405866	NA			10497765	Dcun1d1							10360070	Fcer1g	10400350	Cfl2	10529515	Sorcs2			10512791	Tbc1d2			10372534	Cnot2
10562905	Atf5	10368011	Vta1			10393642	Eif4a3							10360139	Klhdc9	10373101	Pip4k2c	10520521	Cenpa			10593320	Rpl10			10372629	Yeats4
10456721	NA	10405287	Higd2a			10541049	March8							10360147	Alyref2	10373009	Tsfm	10555576	Anapc15			10461423	Fads3			10372745	Dyrk2
10342495	NA	10438272	Prodh			10582303	Cyba							10360538	Desi2	10435149	Fyttd1	10508151	Clspn			10406407	Arrdc3			10372853	Tbk1
10534056	Hpvc-ps	10397275	Ltbp2			10454134	Dsg4							10360741	Ccdc121	10584194	Srpr	10587508	Ttk			10343541	NA			10373027	Tspan31
10568780	Mapk1ip1	10599962	Mamld1			10394532	Ube2f							10360743	NA	10349834	Pik3c2b	10382848	Mettl23			10343384	NA			10373036	Os9
10339042	NA	10352348	Cnih4			10606730	Armcx6							10361021	NA	10565156	Homer2	10394858	NA			10576386	Rhou			10373073	Arhgef25
10341833	NA	10451301	Rpl11			10360120	Ufc1							10361356	NA	10598107	Taf1a	10542872	Rps4y2			10521391	Acox3			10373340	Rbms2
10599335	Mcts1	10535231	Ttyh3			10343942	NA							10361509	Syne1	10379891	Ppm1d	10579974	Tbc1d9			10411958	Rnf180			10373396	Myl6
10377537	Chd3	10497203	Hey1			10355967	Ap1s3							10361616	NA	10431017	Ttll1	10357436	Mcm6			10527448	Bud31			10373454	Pa2g4
10339755	NA	10342013	NA			10549420	Tmtc1							10362208	NA	10489660	Elmo2	10582275	Slc7a5			10338384	NA			10373515	Suox
10461143	Chrm1	10427459	NA			10573483	Prdx2							10362422	Trdn	10508269	Smim12	10582190	Gins2			10581495	Rplp1			10373571	NA
10341555	NA	10388430	Serpinf1			10485674	Arl14ep							10362442	Trdn	10342683	NA	10338214	NA			10358543	Hmcn1			10373594	Bloc1s1
10380641	Hoxb5	10371271	Zfp781			10559796	Peg3							10363146	Slc35f1	10583573	Atg4d	10408197	Hist1h2bh			10492452	NA			10373709	Eif4enif1
10503264	Ccne2	10436487	Vgll3			10397148	Acot1							10363475	Prf1	10367413	Dnajc14	10340516	NA			10344000	NA			10373778	Morc2a
10556302	Ampd3	10415052	Mmp14			10341466	NA							10363667	NA	10535174	Tmem184a	10499703	NA			10593421	1110032A03Rik			10373950	Nipsnap1
10340143	NA	10342243	NA			10435724	B4galt4							10363762	Tmem26	10535586	Smurf1	10340108	NA			10345715	Map4k4			10374181	NA
10342110	NA	10600797	Apoo-ps			10344062	NA							10363887	Bicc1	10605181	Renbp	10343476	NA			10341182	NA			10374442	C1d
10540269	Gpr27	10554034	Cers3			10376803	Fam83g							10364262	Itgb2	10405236	Sfxn1	10600685	1600014K23Rik			10571975	NA			10374485	Peli1
10341934	NA	10575861	Hsbp1			10525464	Orai1							10364324	NA	10342723	NA	10444386	Gpsm3			10388461	Cox7c			10374500	Vps54
10601335	Pbdc1	10339405	NA			10458547	Gm8615							10364435	NA	10494227	Cers2	10458285	Spata24			10511345	Sdr16c5			10374590	Xpo1
10438308	Ranbp1	10371502	Fabp3			10340716	NA							10364559	Arid3a	10380699	Copz2	10338202	NA			10365344	Tcp11l2			10374621	Ahsa2
10607330	Fam120c	10594590	Snx1			10361799	Adat2							10364650	Hmha1	10589004	Qars	10340260	NA			10399588	NA			10374706	Pus10
10429968	NA	10452874	Atp6v1f			10418475	Spcs1							10364932	Tmprss9	10426704	Kcnh3	10367073	Snrpd2			10607183	Lhfpl1			10374793	Pnpt1
10561868	Wdr62					10537292	1810058I24Rik							10365574	Pmch	10454525	Iws1	10344426	NA			10340588	NA			10374880	Mtif2
10420785	NA					10338984	NA							10366512	NA	10593842	Tspan3	10352556	NA			10380591	Snf8			10374908	Rtn4
10535413	NA					10384717	Pex13							10366517	Kcnmb4	10405576	Fbxl21	10585803	Stra6			10476042	Tgm3			10374934	Psme4
10341615	NA					10342764	NA							10366707	Avpr1a	10595981	Mras	10447634	Gm9992			10478938	Hax1			10375125	Ssbp1
10495316	Psrc1					10549256	Kras							10366774	Avil	10338295	NA	10584901	Dscaml1			10350489	Uchl5			10375240	Hspd1
10342870	NA					10341325	NA							10367041	Rdh9	10354191	Rnf149	10543772	Klf14			10548729	Mansc1			10375529	Zfp62
10432986	Aaas					10350614	Trmt1l							10367118	NA	10557069	Mettl9	10447725	Qk							10375704	3010026O09Rik
10341155	NA					10521589	Cir1							10367440	Itga7	10466087	Tmem109	10427166	Espl1							10375735	Hnrnph1
10595718	Chst2					10476893	Gzf1							10368064	NA	10587746	Tmem41b	10364328	Gm10318							10376142	Oser1
10493496	Adam15					10362171	Stx7							10368495	Rspo3	10338712	NA	10552843	Mir150							10376263	Mfap3
10458138	Brd8					10543120	Ica1							10368556	Hey2	10410124	Ctsl	10371002	Lsm7							10376425	NA
10412549	D830030K20Rik					10340098	NA							10369028	Gprc6a	10523674	Nudt9	10494402	Hist2h3c1							10377255	Stx8
10443215	Snrpc					10400137	Dnajb9							10369301	Chst3	10425461	Adsl	10551314	NA							10377938	Eno3
10341854	NA					10445898	Rab5a							10369431	Adamts14	10397895	Ubr7	10341156	NA							10378271	1200014J11Rik
10595909	NA					10600524	Vbp1							10370330	Krtap10-4	10451225	Polh	10474437	Ccdc34							10378668	Pitpna
10528170	Cycs					10582925	Alkbh8							10370914	Abhd17a	10352503	Bpnt1	10343122	NA							10378681	Inpp5k
10417068	NA					10555510	Pde2a							10371032	Diras1	10608650	H2-T9	10357137	Gli2							10378774	Timm22
10604735	Rbmx					10379615	Slfn5							10371111	Tjp3	10479297	Lsm14b	10408249	NA							10378902	Nufip2
10344584	NA					10523468	Bmp2k							10371134	Gipc3	10386789	Ulk2	10339540	NA							10379204	Poldip2
10343366	NA					10529875	Ldb2							10371154	4930404N11Rik	10420846	Fzd3	10357965	Lgr6							10379215	Ift20
10558919	Snora52					10389561	Dhx40							10371217	S1pr4	10341967	NA	10520650	Cad							10379445	NA
10517967	Fblim1					10595573	Snx14							10372726	NA	10387791	Slc16a13	10339660	NA							10379689	Taf15
10529799	NA					10554521	Pde8a							10373218	Nxph4	10575120	Sntb2	10462632	Kif20b							10380210	Srsf1
10341723	NA					10491083	Nceh1							10373695	Il22	10427290	Hoxc8	10448803	Hn1l							10380297	Cox11
10420589	Amer2					10478776	Arfgef2							10374115	Nudcd3	10413752	Bap1	10584628	Thy1							10380321	Mbtd1
10592727	Rnf26					10341264	NA							10374333	Ikzf1	10379436	Rhbdl3	10401673	Tgfb3							10380341	Spag9
10607412	Samt1					10501586	S1pr1							10374764	Gm12070	10594447	Map2k1	10340908	NA							10380384	Ankrd40
10343207	NA					10603109	Piga							10374929	4931440F15Rik	10340174	NA	10341775	NA							10380403	Lrrc59
10342721	NA					10456378	Chmp1b							10375145	Lcp2	10499751	Creb3l4	10497644	Sec62							10380648	Hoxb4
10455780	Gapdh					10404941	Kdm1b							10375789	Olfr1377	10342562	NA	10520940	Plb1							10380815	Psmb3
10399428	Snord118					10358664	Hmcn1							10375791	Olfr51	10342171	NA	10449575	Ppil1							10381154	Cnp
10557644	Fbrs					10419343	Atg14							10376245	Gria1	10408557	Serpinb1a	10419779	Haus4							10381345	Psme3
10403945	Hist1h4m					10344789	Cspp1							10376392	Olfr325	10401684	Angel1	10562818	Pold1							10382049	Ddx42
10339389	NA					10362201	Ctgf							10376402	Olfr322	10460085	Cndp2	10465424	Nrxn2							10382069	Psmc5
10339836	NA					10368654	Nt5dc1							10376796	Grap	10339455	NA	10343282	NA							10382115	Cep95
10340727	NA					10467230	Ide							10376887	Snord49a	10344160	NA	10364752	Dazap1							10382328	Sox9
10338192	NA					10505200	Hsdl2							10377245	Dhrs7c	10372877	Xpot	10465912	Fen1							10383360	Ccdc137
10505858	Ifnz					10406941	Sgtb							10377588	Sox15	10533993	Slc15a4	10570663	Defa25							10383756	Ifitm2
10450038	Angptl4					10342732	NA							10378286	Itgae	10369586	Supv3l1	10526880	NA							10384322	Hus1
10560202	Gltscr1					10478196	Top1							10378319	P2rx5	10580233	Gcdh	10340981	NA							10384349	Polr2c
10461723	Fam111a					10455801	Phax							10378401	NA	10513381	Ptbp3	10489589	Pcif1							10384504	Meis1
10340900	NA					10359571	Fmo1							10378855	NA	10488020	Tmx4	10340059	NA							10384656	B3gnt2
10366737	NA					10411690	Rad17							10379260	Ksr1	10341102	NA	10340793	NA							10384672	Ahsa2
10341205	NA					10478048	Lbp							10379535	Ccl8	10394843	NA	10339959	NA							10384940	Erlec1
10478744	NA					10341214	NA							10379543	Tmem132e	10442616	Hagh	10430032	Tonsl							10385043	Npm1
10591610	Dock6					10439218	Pdia5							10379677	Rasl10b	10596207	Uba5	10406968	Cenpk							10385159	Rars
10339549	NA					10590597	Sacm1l							10380614	Hoxb13	10568361	Yipf5	10344308	NA							10385557	Cnot6
10588073	Prr23a					10504564	Dcaf10							10380719	Sp6	10379013	Flot2	10356088	Col4a4							10385599	Canx
10500324	Hist2h2aa1					10593413	2310030G06Rik							10380721	Scrn2	10436239	Zbtb11	10344190	NA							10385635	Zfp354c
10561958	Arhgap33					10341553	NA							10380819	Cwc25	10575799	Plcg2	10353189	Gm5523							10385686	Hnrnpab
10338186	NA					10531931	Sparcl1							10380887	Tcap	10340488	NA	10510884	Megf6							10385761	Ube2b
10339581	NA					10558454	Glrx3							10381381	NA	10533633	Diablo	10338119	NA							10385790	Hspa4
10338838	NA					10344801	Cspp1							10381708	Fmnl1	10580537	Aktip	10463064	Gapdh							10386159	Zfp672
10462361	Hmgb1					10493984	Tchh							10382449	Rab37	10547386	Adipor2	10348489	Prlh							10386219	Zfp39
10555233	NA					10521587	Dnaja1							10383109	Card14	10501762	Snx7	10492658	NA							10386370	Arf1
10554463	Hddc3					10411373	Hexb							10383210	NA	10343636	NA	10408266	Hist1h2ba							10386518	Atpaf2
10344082	NA					10468653	A630007B06Rik							10383212	NA	10342851	NA	10408085	Hist1h2an							10386850	Ncor1
10601150	NA					10519983	Fgl2							10383342	NA	10530045	Sepsecs	10571752	Dctd							10387363	Cyb5d1
10351037	Gas5					10440554	Ltn1							10384396	NA	10395855	Mipol1	10494407	Hist2h2bb							10387545	Eif4a1
10342269	NA					10344236	NA							10384615	Otx1	10340125	NA	10530841	Igfbp7							10387992	Nup88
10338116	NA					10536407	Phf14							10385391	Cyfip2	10433114	Itga5	10564978	Blm							10388488	Fam101b
10446928	Ltbp1					10445268	Gpr116							10385428	Itk	10493709	Slc39a1	10355327	Bard1							10388684	Taok1
10341562	NA					10473384	Slc43a3							10385477	NA	10479063	Rab22a	10482119	NA							10388734	Eral1
10607116	Ammecr1					10458098	Pkd2l2							10386110	Hand1	10527508	Cdk8	10518350	Hmgb2							10388869	Tnfaip1
10554586	4833418N17Rik					10342426	NA							10386376	Wnt3a	10486057	Rab5b	10444407	Ager							10389245	Tada2a
10368970	Prdm1					10395142	Sh3yl1							10386963	F930015N05Rik	10538617	Lancl2	10579987	Scoc							10389783	NA
10469609	Gm13375					10558325	Bccip							10387983	NA	10389300	Dhrs11	10464583	Gstp1							10389816	Tom1l1
10340244	NA					10521832	Pi4k2b							10388389	Hic1	10526772	Cnpy4	10399640	NA							10390574	Fbxl20
10549758	Zfp784					10528268	Ptpn12							10388679	Abhd15	10517213	Cnksr1	10338623	NA							10390768	Smarce1
10430626	Npcd					10499080	Arfip1							10388776	Rpl23a	10342949	NA	10528077	Dbf4							10390913	Krtap2-4
10561485	Pak4					10462136	Cycs							10389151	Slfn10-ps	10436402	Cldn25	10344350	NA							10391130	Nt5c3b
10469135	NA					10403680	Arid4b							10389177	Mmp28	10543031	Slc25a13	10507870	NA							10391178	Dnajc7
10608709	Nkain1					10516393	2004-08-01							10389389	NA	10420035	Ipo4	10538959	Foxi3							10391407	Coa3
10510878	Megf6					10541910	Vwf							10389639	Lpo	10527441	Arpc1b	10527024	NA							10391410	Becn1
10581388	Lcat					10343077	NA							10390211	Igf2bp1	10405179	S1pr3	10340663	NA							10391742	Gpatch8
10510874	Megf6					10485314	Ttc17							10390246	Calcoco2	10341405	NA	10479560	Rtel1							10391949	Gosr2
10504188	Ccl19					10375973	Taf13							10390328	Tbx21	10602166	Nxt2	10338403	NA							10392012	Cdc27
10568139	Maz					10547521	Atp6v1e1							10390560	Stac2	10383897	Nf2	10344797	NA							10392070	Strada
10342676	NA					10594636	Ppp1r2							10390860	Krt23	10502951	Acadm	10361620	Rmnd1							10392087	Ccdc47
10367335	NA					10583242	Sesn3							10391870	Map3k14	10380477	Ppp1r9b	10343544	NA							10392318	Bptf
10344053	NA					10452815	Xdh							10391914	Arhgap27	10579969	Zfp330	10464202	Vwa2							10392739	Sdk2
10364856	Dot1l					10606301	Magt1							10392904	Ush1g	10393408	Tmc6	10563037	Scaf1							10393058	H3f3b
10465638	Naa40					10400095	Ifrd1							10393064	Unc13d	10485402	Fjx1	10340267	NA							10393309	Prpsap1
10488623	Sox12					10608107	Uty							10393106	Trim47	10344352	NA	10400189	NA							10393395	Srsf2
10340998	NA					10496872	Eltd1							10393436	Tha1	10408755	Bloc1s5	10343270	NA							10393844	Alyref
10424413	Hmgb1					10364072	Ggt5							10394678	NA	10473125	Itga4	10527483	Zscan25							10394144	1700012B15Rik
10561673	Spred3					10339290	NA							10394802	5730507C01Rik	10343608	NA	10485277	NA							10394353	0610009D07Rik
10418205	Plac9a					10437160	Ets2							10394823	NA	10417895	Ppp3cb	10341093	NA							10394381	Atad2b
10560174	Sepw1					10579976	Elmod2							10395374	Gm5434	10363118	Dcbld1	10558825	Lrrc56							10395376	Ankmy2
10531610	Rasgef1b					10342860	NA							10395457	Etv1	10576911	Efnb2	10591608	Dock6							10395612	G2e3
10495054	Rhoc					10503520	Ttpa							10395604	NA	10458560	Fgf1	10355639	Prkag3							10395788	Srp54c
10339384	NA					10596148	Trf							10395889	Sstr1	10343468	NA	10456246	NA							10395910	Pnn
10511416	Tox					10397912	Unc79							10395908	NA	10342291	NA	10532339	Pxmp2							10396193	Psma3
10596982	Tma7					10428103	Stk3							10396121	4930512B01Rik	10363455	Pcbd1	10490384	Lama5							10396237	2700049A03Rik
10525352	Ppp1cc					10436169	Ift57							10396952	Ttc9	10462035	Ldhb	10403980	Hist1h2br							10396383	Slc38a6
10501699	Agl					10565178	Btbd1							10397440	Esrrb	10454606	Wdr36	10344076	NA							10397267	Isca2
10510861	Megf6					10480121	Fam188a							10397536	Gm4005	10480541	Ehmt1	10601285	Dmrtc1c1							10397281	Ylpm1
10492558	Smc4					10338918	NA							10397627	NA	10605247	Mecp2	10458762	NA							10397311	Dlst
10371159	Fzr1					10428398	Eif3e							10397853	Rin3	10575578	Pdpr	10342111	NA							10397507	Gstz1
10341318	NA					10507726	Cited4							10398211	Hhipl1	10447490	Pja2	10553967	Pcsk6							10397530	Slirp
10342083	NA					10396079	Klhdc1							10398332	Mir673	10495343	Wdr47	10338642	NA							10397752	Calm1
10436783	Sod1					10491261	Sec62							10398340	Rtl1	10420372	Cryl1	10503315	Rad54b							10397866	Golga5
10407993	Srsf10					10604799	Atp11c							10398356	NA	10338369	NA	10342677	NA							10398147	Papola
10434664	Ndufa11					10369154	Man1a							10398398	Mir666	10439566	Atp6v1a	10479379	Slco4a1							10398453	Ppp2r5c
10446166	Ndufa11					10384522	Actr2							10398436	Mir409	10574427	Impdh2	10381930	NA							10399036	Uevld
10359849	NA					10369932	Susd2							10398451	Rps25	10543067	Asns	10465282	Pola2							10399038	Zfp386
10497894	Cetn4					10339733	NA							10398635	Amn	10339667	NA	10341867	NA							10399224	1110002L01Rik
10573451	Syce2					10358662	Hmcn1							10398649	Exoc3l4	10340737	NA	10454192	Ttr							10399254	Cenpo
10342041	NA					10487175	Cops2							10398812	Mir203	10521830	Slc35a4	10344294	NA							10399337	Klhl29
10415396	Nfatc4					10407803	Gpr137b							10398881	Zbtb42	10434467	Psmd2	10542239	Prp2							10399430	Ddx1
10338616	NA					10341081	NA							10399032	NA	10401987	Kcnk10	10468893	Csf2ra							10399605	Adam17
10582008	Cmc2					10498361	Gpr87							10399575	NA	10344216	NA	10584252	Gm9513							10399629	Ywhaq
10339318	NA					10341153	NA							10399689	NA	10350377	Zbtb41	10397642	NA							10399666	NA
10399011	4930427A07Rik					10346310	Mob4							10399751	Colec11	10341112	NA	10516246	Cdca8							10399675	NA
10357948	Ppp1r12b					10488382	Cd93							10400553	Gm4971	10342618	NA	10338947	NA							10399841	Cbll1
10548176	Rhno1					10339286	NA							10401698	Irf2bpl	10607587	Pdha1	10507653	NA							10399882	Dus4l
10343128	NA					10406852	Cnn3							10401831	Gm5662	10604528	Mbnl3	10503615	NA							10399897	Hbp1
10485131	Gyltl1b					10343252	NA							10401937	NA	10608685	Ppp4r2	10526213	NA							10400293	Dtd2
10395389	Sostdc1					10463930	Mxi1							10401944	NA	10412260	Fst	10344332	NA							10400413	Ralgapa1
10401109	Gpx2					10432799	Krt71							10402136	Gpr68	10473312	Fam171b	10342130	NA							10400470	Cox6c
10522411	Cwh43					10341465	NA							10402266	NA	10473045	Rbm45	10355401	Acp1							10400805	Nin
10340382	NA					10369920	Fam211b							10402440	Gsc	10575211	Mir140	10598220	Gm2799							10401138	Atp6v1d
10338209	NA					10453705	Rab18							10402572	Ccdc85c	10342215	NA	10340035	NA							10401309	Cox16
10569923	Lrrc8e					10387890	Cxcl16							10402994	NA	10341792	NA	10343394	NA							10401322	Synj2bp
10343739	NA					10574438	Cdh5							10403071	NA	10407955	Epdr1	10557843	Fus							10401335	Med6
10377804	Arrb2					10343273	NA							10403816	Tcrg-V4	10443391	Mapk14	10493850	Sprr2a1							10401382	Numb
10489261	Emilin3					10343884	NA							10403825	Tcrg-V1	10339956	NA	10456400	Tubb6							10401564	Arel1
10341316	NA					10401753	Vipas39							10403988	Vmn1r196	10478983	Rtfdc1	10338521	NA							10401737	Tmed8
10526232	Wbscr27					10405001	Bicd2							10404006	NA	10508992	Paqr7	10488785	E2f1							10401781	Sptlc2
10343780	NA					10606513	Chm							10404389	Irf4	10338292	NA	10340221	NA							10401882	Gtf2a1
10605943	Pdzd11					10528207	Cd36							10404836	Rnf182	10497842	Bbs7	10399636	Mrto4							10402179	Smek1
10343826	NA					10448034	Dll1							10404840	Cd83	10493812	S100a4	10341505	NA							10402615	Hsp90aa1
10405779	Mir23b					10339341	NA							10404904	Rbm24	10339765	NA	10341718	NA							10402648	Mpc1
10487847	1700037H04Rik					10599377	Stag2							10404982	Barx1	10344410	NA	10408111	Hist1h2ao							10403428	Larp4b
10425082	Kctd17					10421012	Ppp2r2a							10405432	Rgs14	10353993	Coa5	10343172	NA							10403750	Mplkip
10578145	Erh					10341051	NA							10405566	Slc25a48	10581664	Il34	10338191	NA							10404538	Prpf4b
10344317	NA					10366476	Ptprb							10405755	NA	10548905	Eps8	10371269	Rpl23a							10404630	Riok1
10606235	Zdhhc15					10536931	Ahcyl2							10405888	Cbx3	10447141	Eml4	10446713	Snord53							10404717	Pak1ip1
10585586	Ube2s					10554863	Sytl2							10406548	NA	10608680	H2-T10	10483401	Spc25							10405163	Spin1
10339346	NA					10372457	Tbc1d15							10406777	Gcnt4	10603026	Ctps2	10559784	Olfr1347							10405280	Arl10
10510880	Megf6					10577954	Rab11fip1							10406856	NA	10344126	NA	10557124	Scnn1b							10405427	Prelid1
10584595	2610203C20Rik					10400109	Zfp277							10407535	Rpl10a	10359190	Fam20b	10341422	NA							10405488	Tmed9
10340966	NA					10581577	Dhx38							10408037	Nkapl	10500960	Ddx20	10338998	NA							10405605	Smad5
10340492	NA					10529977	Ppargc1a							10408121	NA	10605370	Mpp1	10338914	NA							10405619	Idnk
10381250	Tubg1					10545298	Rmnd5a							10408523	Foxq1	10420659	Spryd7	10399421	Mycn							10405729	Selk
10555574	Inppl1					10604630	Mospd1							10408529	NA	10530130	Rell1	10344046	NA							10405757	2010111I01Rik
10339988	NA					10392221	Pecam1							10408810	NA	10379820	Acaca	10518955	BC049688							10405916	A530054K11Rik
10343097	NA					10407072	Elovl7							10408879	Gfod1	10343025	NA	10594750	C2cd4a							10405918	Rsl1
10371141	Hmg20b					10596257	Dnajc13							10409202	NA	10458090	Reep5	10411728	Cenph							10406287	Ttc37
10377605	Tmem256					10458784	Pggt1b							10409541	NA	10415642	Sap18	10487930	Pcna							10406417	Actg1
10341730	NA					10500069	Pip5k1a							10409711	NA	10342983	NA	10394936	NA							10406426	Cetn3
10385776	Tcf7					10338938	NA							10409779	4921517D22Rik	10425016	Commd5	10366803	Cyp27b1							10406530	Tmem167
10452147	Nrtn					10431935	Amigo2							10409866	Ctla2b	10339754	NA	10505845	Ifnz							10406614	Mtx3
10568217	Dctpp1					10411508	Ptcd2							10411359	Plp2	10341897	NA	10344251	NA							10406681	Ap3b1
10545588	Hk2					10496302	Manba							10411527	Cartpt	10425116	Cdc42ep1	10370798	Adamtsl5							10406742	Poc5
10549917	Vmn2r43					10451953	Lrg1							10411680	Marveld2	10340525	NA	10576140	Cdt1							10407012	Srek1ip1
10532839	Trpv4					10389339	Usp32							10412064	NA	10500720	Slc22a15	10604844	Sms							10407040	Esco1
10532984	Dynll1					10338195	NA							10412376	Emb	10344311	NA	10339151	NA							10407053	Smim15
10343202	NA					10543319	Fam3c							10412907	NA	10499454	Dap3	10344933	NA							10407192	Slc38a9
10510876	Megf6					10581902	Cfdp1							10414137	Grid1	10338280	NA	10510546	Eno1							10407327	Emb
10345675	Npas2					10565486	Eed							10414182	Dydc1	10339249	NA	10455595	Eno1							10407543	NA
10499639	Cks1b					10426891	Mettl7a1							10414258	NA	10491945	Rab33b	10582376	Piezo1							10407570	Zmynd11
10490028	Zfp64					10512136	Bag1							10414271	Ptger2	10378253	Camkk1	10338887	NA							10407811	Hnrnpf
10347910	Fbxo36					10546606	Uba3							10414576	Gm5622	10462140	Dock8	10344990	Crispld1							10407814	Tbce
10338408	NA					10428998	Asap1							10414807	Trav14d-3-dv8	10343417	NA	10583732	Ldlr							10407924	Gpank1
10576854	Ctxn1					10446823	Yipf4							10414937	NA	10596200	Tmem108	10478847	1500012F01Rik							10408010	Zkscan3
10510886	Megf6					10362837	Sec63							10414993	A630038E17Rik	10340420	NA	10375501	Snord95							10408032	Zscan26
10434668	Tmem97					10386824	Akap10							10415011	NA	10603702	Llph	10531189	Adamts3							10408049	Zkscan8
10343796	NA					10461439	Fads1							10415279	Fitm1	10471953	Acvr2a	10531185	Adamts3							10408331	Acot13
10557992	Bag3					10503534	Ccnc							10416266	Ppp3cc	10560530	Bloc1s3	10445293	Pla2g7							10408490	Exoc2
10444932	Ppp1r18					10343815	NA							10416421	Lrch1	10376326	Irgm2	10342898	NA							10408684	Tmed10
10344811	Cspp1					10505779	Acer2							10416437	Lcp1	10365297	D10Wsu102e	10349733	Nucks1							10408767	Slc35b3
10518989	Trp73					10400538	Trappc6b							10416488	NA	10510844	Wrap73	10338136	NA							10409294	Sptlc1
10338188	NA					10605113	L1cam							10416584	NA	10575534	St3gal2	10561956	Rps12							10409579	Cxcl14
10502240	Npnt					10496359	Emcn							10416887	Slain1	10450744	NA	10380622	Hoxb9							10409709	Mir7-1
10519497	Steap4					10538459	Aqp1							10416915	Rpl41	10341169	NA	10342806	NA							10409986	4933434E20Rik
10469505	Commd3					10466573	Ostf1							10416929	NA	10397975	Ifi27	10433088	Cbx5							10410209	Rybp
10340129	NA					10414102	Mmrn2							10417000	NA	10444244	Tap1	10342588	NA							10410259	Uqcrb
10471036	Dolpp1					10407307	Mocs2							10417048	Hs6st3	10412267	Itga2	10354739	Atp5l							10410302	Zfp953
10507471	NA					10344185	NA							10417725	NA	10568131	Pagr1a	10338972	NA							10410345	Zfp748
10430748	Rangap1					10604451	Enox2							10417798	Kcnk5	10358379	Trove2	10338092	NA							10410355	A530054K11Rik
10338672	NA					10343652	NA							10417807	Kcnk16	10501244	Ampd2	10581013	Cdh11							10410501	Irx1
10450614	2310061I04Rik					10466735	Fam189a2							10418718	NA	10366848	B4galnt1	10566205	Usp17ld							10410709	Rfesd
10551554	Sars2					10453254	Cox7a2l							10418729	Colq	10340211	NA	10383472	Rac3							10410921	Cox7c
10343363	NA					10403584	Nid1							10418838	NA	10343812	NA	10344392	NA							10411119	Papd4
10593937	Mpi					10543686	Ube2h							10419089	Dydc2	10478341	Ift52	10600169	Bgn							10411126	Jmy
10449608	Mdga1					10343222	NA							10419132	Gm10375	10338489	NA	10338666	NA							10411287	Btf3l4
10378216	Atp2a3					10435963	Atg3							10419160	NA	10489107	Samhd1	10391066	Krt17							10411464	Fcho2
10454735	Fam53c					10471486	Eng							10421184	NA	10343198	NA	10343456	NA							10411552	Bdp1
10338875	NA					10414025	Gdf10							10421436	Fgf17	10496569	Gbp7	10343968	NA							10411711	Cdk7
10364888	NA					10598236	Nudt11							10421685	Serp2	10444830	H2-Q7	10343151	NA							10411782	Pik3r1
10444291	H2-Ab1					10343599	NA							10422009	Dppa2	10447951	Thbs2	10482762	Idi1							10411853	Erbb2ip
10339104	NA					10384539	Slc1a4							10422280	Abcc4	10450699	Gm7030	10608454	Ssty2							10411974	Ipo11
10409352	Rnf44					10608001	Eif2s3y							10423902	Zfpm2	10442057	Riok2	10339523	NA							10412207	Gpx8
10387807	0610010K14Rik					10543791	Podxl							10424667	Them6	10404686	Bmp6	10473008	Hnrnpa3							10412251	Ndufs4
10603492	Porcn					10428604	Tnfrsf11b							10424674	NA	10538100	Repin1	10569646	Ccnd1							10412345	Parp8
10561431	Plekhg2					10419170	Txndc16							10424789	Spatc1	10385500	Irgm1	10387668	Tnk1							10412701	3830406C13Rik
10568065	Ino80e					10411927	Cwc27							10424810	Gpaa1	10566926	Rnf141	10342722	NA							10412711	Uqcrb
10385699	Rmnd5b					10511725	Cyb5r4							10424979	Gpt	10415392	Ltb4r1	10521698	NA							10412844	Top2b
10339524	NA					10343496	NA							10425031	Apol6	10511099	Slc35e2	10342783	NA							10412960	Fam149b
10340745	NA					10390816	Krt27							10425223	Galr3	10542791	Ppfibp1	10342471	NA							10413265	Duxbl1
10338277	NA					10491136	Tnik							10425321	Apobec3	10429607	Top1mt	10376339	Zfp692							10413530	Dcp1a
10476104	NA					10351583	Pfdn2							10425410	Grap2	10605740	Eif2s3x	10381111	NA							10413559	Rft1
10452793	Galnt14					10539894	Mgll							10425655	Mei1	10521440	Afap1	10579769	Gapdh							10413640	Nek4
10343624	NA					10414374	Ktn1							10425723	1500009C09Rik	10453373	Prepl	10344045	NA							10413657	Glt8d1
10340907	NA					10338308	NA							10425808	Tspo	10450075	H2-K1	10491526	Acad9							10413695	Pbrm1
10342718	NA					10496854	Ttll7							10425814	Mpped1	10440647	Cldn8	10360090	Ppox							10413697	Pbrm1
10571907	Mfap3l					10540391	Trnt1							10426767	Aqp5	10350136	Csrp1	10442736	BC003965							10413771	Capn7
10369481	H2afy2					10343376	NA							10426924	Slc4a8	10444821	H2-Q8	10338282	NA							10413853	Parg
10502230	NA					10587880	Pcolce2							10427308	NA	10511446	Asph	10592891	Phldb1							10414355	Mapk1ip1l
10442549	Zfp598					10595402	Fam46a							10427628	Il7r	10416505	Kctd4	10340230	NA							10414703	NA
10344473	NA					10495659	Cnn3							10427675	Spef2	10451054	Enpp4	10343746	NA							10415119	Pabpn1
10450365	NA					10606393	Brwd3							10427796	Npr3	10383214	Rnf213	10340248	NA							10415176	Dhrs4
10341804	NA					10399820	Acp1							10427814	Golph3	10342246	NA	10343460	NA							10415576	Zmym2
10338275	NA					10341095	NA							10428008	Ankrd33b	10537911	Zfp398	10483000	Itgb6							10415608	Ift88
10456136	Il17b					10464251	Atrnl1							10428124	NA	10601834	Gprasp2	10390175	Ngfr							10415791	Rnaseh2b
10391831	Dcakd					10409265	Auh							10428728	NA	10342359	NA	10343904	NA							10416169	Gnrh1
10381082	Rara					10396205	Arid4a							10428825	NA	10471550	Rpl12	10344218	NA							10416230	Tnfrsf10b
10347915	Gm7609					10584317	Esam							10428940	NA	10421325	Piwil2	10419390	NA							10416411	Esd
10516484	Gjb3					10343823	NA							10429234	Col22a1	10406663	Arsb	10338407	NA							10416464	Zc3h13
10341861	NA					10376314	Cnot8							10429843	Parp10	10458960	Aldh7a1	10339100	NA							10416496	Tpt1
10526675	Tsc22d4					10489364	Oser1							10430344	Il2rb	10467871	Dnmbp	10344521	NA							10416709	Tdrd3
10340117	NA					10420935	Ephx2							10430372	Rac2	10444824	H2-Q6	10470913	Pkn3							10416753	Pibf1
10521907	Smim20					10473190	Dnajc10							10430382	NA	10358434	Pla2g4a	10338470	NA							10417124	B930095G15Rik
10551336	Numbl					10341801	NA							10430384	Elfn2	10390153	Kat7	10344387	NA							10417601	Ptma
10608667	Myef2					10419354	Map1lc3b							10430436	NA	10419082	Fam213a	10342219	NA							10418004	Ap3m1
10456745	Smad7					10546631	Frmd4b							10430467	Slc16a8	10343404	NA	10343050	NA							10418251	Appl1
10557439	Ccdc101					10472738	Dcaf17							10430818	Tnfrsf13c	10463462	Sfxn3	10338518	NA							10418275	Ccdc66
10343922	NA					10364293	Ube2g2							10431635	NA	10360460	Chml	10361869	Nhsl1							10418480	Gnl3
10532896	2610524H06Rik					10582985	Casp1							10431738	Prickle1	10413229	Anxa11	10497483	Hmgb1							10418720	Mettl6
10341611	NA					10463070	Entpd1							10431839	Dbx2	10414333	Samd4	10561128	Cyp2s1							10418796	Dph3
10342100	NA					10339994	NA							10432045	Col2a1	10471337	Pomt1	10417700	NA							10418927	Bmpr1a
10342641	NA					10535807	Flt1							10432556	NA	10494122	Rfx5	10544108	Klrg2							10418991	Ccser2
10340215	NA					10339365	NA							10432593	Csrnp2	10340633	NA	10473240	Eno1							10419198	Ero1l
10341396	NA					10381419	Nbr1							10432661	Galnt6	10360589	Ahctf1	10338594	NA							10419223	Fermt2
10364722	Efna2					10414288	Psmc6							10432907	Krt78	10371296	Glt8d2	10342576	NA							10419267	Cnih
10390032	Acsf2					10475630	Galk2							10432957	Itgb7	10467739	Avpi1	10498597	1110032F04Rik							10419578	Ndrg2
10342738	NA					10503134	Sdcbp							10433163	Ppp1r1a	10342813	NA	10593270	Ttc12							10419676	Rab2b
10549760	Zfp580					10354649	Pgap1							10433302	4930562C15Rik	10429859	Oplah	10338757	NA							10419691	Mettl3
10342563	NA					10601303	Chic1							10433403	Rbfox1	10356968	Pam	10342770	NA							10419731	Nrbf2
10392943	Hn1					10579525	Plvap							10433977	Tmem191c	10458044	Osgep	10343121	NA							10419867	Homez
10340213	NA					10390502	Rpl23							10435565	Hcls1	10545417	Mat2a	10342390	NA							10420348	Zmym5
10501098	Kcnc4					10467115	Ankrd22							10436550	NA	10575844	Cdh13	10393573	Lgals3bp							10420516	Cdadc1
10338890	NA					10342300	NA							10436621	NA	10459827	Rnf165	10341933	NA							10420631	Ebpl
10606735	Armcx2					10342102	NA							10437073	Ripply3	10486061	Rasgrp1	10342944	NA							10421003	Bnip3l
10343684	NA					10410173	Hiatl1							10437272	Nlrc3	10410721	Arsk	10424349	Sqle							10421188	R3hcc1
10404731	Tmem14c					10338537	NA							10437885	Myh11	10340752	NA	10494817	Ngf							10421488	Fndc3a
10421911	Pcdh20					10466800	Pgm5							10438708	Masp1	10350594	Ivns1abp	10341591	NA							10421526	Rb1
10434211	Gnb1l					10358559	Hmcn1							10439237	Rps21	10588192	Msl2	10339379	NA							10421648	Slc25a30
10493245	Mex3a					10359034	Qsox1							10439732	Plcxd2	10396476	Rhoj	10344429	NA							10421723	Dnajc15
10477808	Romo1					10407792	Gpr137b-ps							10439744	Cd96	10422321	Dzip1	10441509	Ppp1r2							10422194	Rbm26
10405781	Mir27b					10363346	Sowahc							10439790	Trat1	10546725	Pdzrn3	10417664	Rpl19							10422892	2410089E03Rik
10500911	Mov10					10443730	Abcg1							10440302	Htr1f	10560015	Rnf141	10581271	Zdhhc1							10423134	Zfr
10341552	NA					10544036	Atp6v0a4							10441178	Itgb2l	10343623	NA	10344532	NA							10423185	Drosha
10339211	NA					10428842	Tatdn1							10441751	NA	10428066	1700084J12Rik	10343341	NA							10423577	Mtdh
10390917	Krtap2-4					10595803	Rnf7							10441858	Smok2a	10376765	Aldh3a1	10342777	NA							10423663	Vps13b
10468531	Nutf2					10338832	NA							10442311	Ccdc64b	10588876	Nicn1	10437134	Dyrk1a							10423842	Dcaf13
10344299	NA					10496837	Ttll7							10442393	Ntn3	10342347	NA	10431210	Wnt7b							10423941	Emc2
10387816	Rnasek					10341389	NA							10442829	Gng13	10537157	Akr1b10	10421737	Tnfsf11							10424188	Mtbp
10339744	NA					10390798	Krt25							10442948	Mrpl28	10350977	4930523C07Rik	10342523	NA							10424340	Ndufb9
10561456	Med29					10529082	Mpv17							10443000	Neurl1b	10348879	Ing5	10540523	Lmcd1							10424363	Nsmce2
10376787	B9d1					10427704	Dnajc21							10443199	AI413582	10483521	Fastkd1	10341039	NA							10424411	Tsg101
10447100	Morn2					10578880	Tll1							10444229	H2-DMa	10607738	Car5b	10342601	NA							10424467	Phf20l1
10563108	Snord35a					10343472	NA							10444258	Psmb8	10469457	Plxdc2	10402490	Syne3							10424577	Chrac1
10510462	Trmt112					10400321	Sptssa							10444312	Btnl2	10379957	Rnft1	10472970	Hoxd4							10425522	Rbx1
10510908	NA					10460061	Zfp407							10444713	Gpank1	10588707	Ifrd2	10471154	Ass1							10425757	Smdt1
10552406	Nkg7					10436708	Usp16							10445008	Lsm5	10396867	Exd2	10485405	Cd44							10425903	NA
10388749	Traf4					10448195	Zfp942							10445046	Trim10	10352914	A330023F24Rik	10451198	Vegfa							10426301	Tcea1
10456719	NA					10396094	Klhdc2							10445145	Olfr118	10495359	Clcc1	10549886	Zfp264							10426439	Pphln1
10338895	NA					10578683	Eif2s2							10445147	Olfr119	10395414	Agmo	10343918	NA							10426827	Larp4
10383479	Hmga1					10587627	Cyb5r4							10445291	NA	10475532	Sqrdl	10442300	NA							10427148	Zfp740
10340992	NA					10341540	NA							10445891	NA	10477543	Cbfa2t2	10563816	Fancf							10427199	Pfdn5
10340890	NA					10343963	NA							10445992	Shd	10444814	H2-Q4	10338520	NA							10427293	Hoxc6
10394054	Cd7					10520965	Yes1							10446253	Vav1	10430997	Pacsin2	10339471	NA							10427310	Hnrnpa1
10535372	Fbxl18					10344123	NA							10447477	NA	10529895	Qdpr	10342785	NA							10427428	AW549877
10341717	NA					10407097	Pde4d							10447688	4930506C21Rik	10403466	Dip2c	10531183	Adamts3							10427744	Rai14
10493235	Paqr6					10438017	Fgd4							10449401	Tcp11	10549388	Pthlh	10366572	Il22							10428119	Cox6c
10392284	Kpna2					10340925	NA							10449672	Tmprss3	10343818	NA	10343165	NA							10428536	Trps1
10339214	NA					10346298	Coq10b							10449775	Notch3	10342098	NA	10531181	Adamts3							10428579	Ext1
10340630	NA					10343813	NA							10450372	Hspa1l	10574220	Cx3cl1	10531203	Adamts3							10428648	Taf2
10380833	Rpl19					10338179	NA							10450431	Ly6g5b	10444780	H2-D1	10607524	Sms							10428690	Mrpl13
10342765	NA					10483856	Prkra							10450501	Tnf	10381539	G6pc3	10407390	Ptbp1							10428698	Sntb1
10338644	NA					10406482	Ccnh							10450779	H2-M10.4	10502224	Sgms2	10343357	NA							10428755	Zhx1
10436106	C330027C09Rik					10482500	Rnd3							10451641	9830107B12Rik	10565018	Iqgap1	10565567	4632427E13Rik							10429389	Rpl17
10487622	Snrpb					10338271	NA							10451646	A530064D06Rik	10344542	NA	10598652	Gm14484							10430145	Rbfox2
10512005	Smim8					10562416	Cebpg							10452082	Znrf4	10492300	Aadac	10604641	AW822252							10430811	Nhp2l1
10343272	NA					10541094	Zfp637							10452468	NA	10338244	NA	10353522	NA							10430834	Naga
10338374	NA					10440727	Krtap8-1							10453394	Six2	10340943	NA	10459084	Synpo							10430871	Tdg
10580137	Mir181c					10497265	Fabp4							10453456	Kcnk12	10447383	Epcam	10505489	Pappa							10431585	Chkb
10340384	NA					10343803	NA							10453734	NA	10491704	Spata5	10564631	Slco3a1							10431612	Rabl2
10344530	NA					10555174	Lrrc32							10454061	NA	10591884	Glb1l2	10425945	Fbln1							10431722	Gxylt1
10340254	NA					10344318	NA							10454445	Slc25a46	10580807	Kifc3	10476093	Nop56							10431732	Zcrb1
10343955	NA					10451736	Tbc1d5							10455335	Pou4f3	10344309	NA	10342510	NA							10431802	Twf1
10437040	Chaf1b					10587854	Slc9a9							10455531	1700018A14Rik	10572580	Use1	10565727	Tsku							10432180	Ccnt1
10341844	NA					10344528	NA							10455809	1700065I17Rik	10413304	Arf4	10341026	NA							10432281	Prkag1
10573234	Lphn1					10542959	Bet1							10456071	Csf1r	10476728	Dtd1	10343976	NA							10432294	Kmt2d
10409276	NA					10518751	Car6							10456392	Cidea	10430400	Card10	10507677	Hivep3							10433219	Naa60
10549762	Ccdc106					10343100	NA							10456513	Mc5r	10593878	Snx33	10340181	NA							10433292	Hmox2
10598482	Timm17b					10491730	Rps23							10456599	NA	10342431	NA	10341837	NA							10433776	Snai2
10342767	NA					10604944	Gabre							10456754	NA	10535559	Baiap2l1	10415017	NA							10433782	Efcab1
10342655	NA					10436666	Jam2							10456756	Zbtb7c	10507594	Slc2a1	10344124	NA							10433910	Top3b
10366346	Phlda1					10532275	Smndc1							10456846	Loxhd1	10454039	Impact	10390931	NA							10433996	Snap29
10485198	Tspan18					10485117	Creb3l1							10456887	Loxhd1	10429957	Fbxl6	10361882	Nhsl1							10434094	Klhl22
10489303	Rpl29					10343444	NA							10457091	Neto1	10544133	Parp12	10570614	Defb6							10434233	Ufd1l
10584883	Fxyd6					10499045	Trim2							10457942	Syt4	10342366	NA	10414706	NA							10434643	Psmb3
10342107	NA					10389581	Ypel2							10458415	NA	10346348	Spats2l	10339711	NA							10434802	Lpp
10573747	Adcy7					10411059	Zfyve16							10458890	NA	10579874	Abce1	10561104	Axl							10434869	Ccdc50
10551185	Tgfb1					10532819	Kctd10							10458956	NA	10513061	Ctnnal1	10531187	Adamts3							10435024	Rnf168
10398267	Evl					10434942	Dlg1							10459075	Myoz3	10342383	NA	10343428	NA							10435237	Zfp148
10569953	Snapc2					10339478	NA							10459153	Cdx1	10340212	NA	10344452	NA							10435617	Rabl3
10509868	Atp13a2					10390823	Krt28							10459292	NA	10338164	NA	10340307	NA							10435641	Fstl1
10436426	Orai2					10397683	Ttc8							10459324	Spink13	10503410	Tmem64	10385034	Rpsa							10435676	Gsk3b
10341590	NA					10349724	Rab7l1							10460257	NA	10424404	Pvt1	10456353	Grp							10435714	Tmem39a
10379989	Ska2					10475625	Eid1							10460400	Pcx	10396278	Daam1	10338366	NA							10435821	Naa50
10443039	Bnip1					10442206	Zfp51							10461038	Macrod1	10394538	Acaca	10341378	NA							10435841	Spice1
10340794	NA					10341796	NA							10461160	NA	10339630	NA	10339967	NA							10436182	Cd47
10343817	NA					10555039	Kctd21							10461162	Snord22	10606217	Abcb7	10343313	NA							10436253	Senp7
10493484	Krtcap2					10414527	Pnp2							10461754	NA	10600485	Dkc1	10344705	NA							10436428	Mina
10373610	Olfr767					10601091	Foxo4							10461775	NA	10544570	Pcnp	10338507	NA							10436849	Ifnar1
10342274	NA					10341586	NA							10461856	Gna14	10441642	Mpc1	10391490	Etv4							10436873	Son
10497503	Kpna2					10342797	NA							10462088	NA	10338257	NA	10430245	Myh9							10437174	Wrb
10516419	Tfap2e					10396306	Jkamp							10462231	Dmrt2	10361007	Smyd2	10344031	NA							10437236	NA
10341889	NA					10342784	NA							10462313	Slc1a1	10578649	Tenm3	10340948	NA							10437330	NA
10343387	NA					10358670	Hmcn1							10463347	Scd3	10447773	Slc22a3	10343794	NA							10437499	Glyr1
10338412	NA					10608698	Zfp429							10463402	NA	10447190	Plekhh2	10460102	Timm21							10437712	Zc3h7a
10576010	Gse1					10552276	Ube2h							10463476	Kazald1	10550487	Mill1	10338495	NA							10437748	Gspt1
10444595	Lsm2					10599120	Dock11							10463513	9130011E15Rik	10360631	Adck3	10339743	NA							10437970	Spidr
10341080	NA					10596267	Dnajc13							10463599	Nfkb2	10511739	Cpne3	10448307	Tnfrsf12a							10438071	Ppil2
10433049	Atp5g2					10469425	Arl5b							10463945	Dusp5	10341083	NA	10532999	Sirt4							10438313	Dgcr8
10495252	Romo1					10343979	NA							10464169	NA	10378367	Trpv3	10341216	NA							10438340	Comt
10453825	Snrpd1					10360344	Darc							10464359	NA	10482167	Zbtb6	10512499	Tpm2							10438400	Mrpl40
10603878	Uxt					10606369	Itm2a							10464594	BC021614	10399061	Esyt2	10343492	NA							10438621	Tra2b
10474998	NA					10395409	Meox2							10464761	Syt12	10477649	Acss2	10339978	NA							10439471	Poglut1
10551741	Dpf1					10521566	Tmem128							10464811	NA	10339710	NA	10338047	NA							10439532	Qtrtd1
10396148	NA					10359582	Fmo2							10465059	Ctsw	10376950	Pmp22	10340452	NA							10439701	Abhd10
10383395	Slc25a10					10518167	Trappc2							10465764	Slc22a30	10340596	NA	10523062	Alb							10439798	Dzip3
10523281	2011-09-01					10405892	Gm10767							10466224	Ms4a3	10338558	NA	10350592	3110040M04Rik							10439854	Bbx
10403413	Idi1					10378848	Hsp90aa1							10466304	Dtx4	10506500	Usp24	10412665	NA							10439881	5330426P16Rik
10415411	Nynrin					10402211	Fbln5							10466353	NA	10386965	Arhgap44	10339643	NA							10439895	Alcam
10418901	NA					10341654	NA							10466361	Olfr1497	10419532	Osgep	10539574	Npm3-ps1							10439980	Pcnp
10339617	NA					10604974	Cetn2							10466515	Foxb2	10377215	Gas7	10370510	Syde1							10440050	Tbc1d23
10341032	NA					10344342	NA							10466814	Foxd4	10578904	Cpe	10427297	Hoxc5							10440206	Arl6
10343498	NA					10341517	NA							10466932	Insl6	10496592	Gbp2	10603005	NA							10440307	Chmp2b
10338327	NA					10504008	Chmp5							10467175	NA	10585732	Ulk3	10494390	Hist2h2aa1							10440414	Fau
10465005	Banf1					10472289	Tank							10467385	Cyp2c68	10587639	Nt5e	10472965	Hoxd8							10440471	Mrpl39
						10371830	Actr6							10467653	Rrp12	10415388	Ltb4r2	10342554	NA							10440568	Ltn1
						10400057	Arl4a							10468783	Vax1	10343686	NA	10380823	Lasp1							10440572	Ltn1
						10443449	Kctd20							10469565	Ptf1a	10392642	Abca5	10338894	NA							10440574	Ltn1
						10343419	NA							10469943	Fam166a	10368638	Fam26e	10342104	NA							10440964	Cryzl1
						10349694	Pm20d1							10470014	Entpd2	10555235	Arrb1	10559989	Aurkc							10441339	A630089N07Rik
						10528546	Gabarapl2							10470042	Fut7	10587383	Cd109	10338483	NA							10441489	Gtf2h5
						10423805	Atp6v1c1							10470248	Gpsm1	10343412	NA	10338814	NA							10441620	Fgfr1op
						10428594	Samd12							10470314	NA	10587299	Ick	10344310	NA							10441864	Mllt4
						10505954	Tek							10470412	Dbh	10380956	Gsdma3	10450723	H2-T10							10441919	1600012H06Rik
						10368041	Abracl							10471569	NA	10415640	Snora65	10350173	Tnnt2							10441933	2210404J11Rik
						10590004	Golga4							10472649	Myo3b	10454286	Mapre2	10489186	Rpl35a							10441973	Tbp
						10386095	Fam114a2							10472953	Hoxd11	10343842	NA	10344098	NA							10441987	Chd1
						10397002	Sipa1l1							10473089	Dfnb59	10544660	Osbpl3	10338120	NA							10442037	Zfp960
						10542714	Lyrm5							10473349	Ypel4	10433199	Zfp263	10539692	Tgfa							10442087	Ncrna00085
						10411776	H3f3a							10473606	NA	10360522	Adss	10340776	NA							10442224	Zfp948
						10339764	NA							10473809	Spi1	10560260	Sae1	10598933	Usp11							10442231	3110052M02Rik
						10417273	Esd							10473880	Lrp4	10339156	NA	10393341	Rhbdf2							10442270	Zfp946
						10341250	NA							10474793	Pak6	10370210	Col6a1	10343340	NA							10442922	Gm10012
						10354389	Slc39a10							10474851	Bahd1	10484888	Ptprj	10346808	Rpl17							10443319	Def6
						10528691	Rheb							10475435	Rps12	10343383	NA	10441396	Ppia							10443836	Rrp1b
						10338141	NA							10475845	Acoxl	10523058	Eif5a	10340860	NA							10443926	Zfp563
						10419274	Gmfb							10475932	Fbln7	10531191	Adamts3	10409200	Gapdh							10443940	Zfp955a
						10366667	Gns							10476393	NA	10531195	Adamts3	10608442	Gm20871							10444056	Daxx
						10521537	Cytl1							10476614	NA	10341375	NA	10490852	NA							10444658	Clic1
						10339316	NA							10477042	Angpt4	10512640	Gne	10598216	NA							10445214	Mut
						10344141	NA							10477069	Tcf15	10515051	Osbpl9	10447128	NA							10445601	Mea1
						10469083	Upf2							10477600	NA	10468691	Ablim1	10405626	Rpl17							10446207	Clpp
						10459183	Slc26a2							10477673	Myh7b	10478928	Tshz2	10493903	Lce3c							10446351	Fert2
						10406254	Ell2							10478364	Tox2	10455948	Chsy3	10474518	NA							10446693	Wdr43
						10460468	Ctsf							10478890	Cebpb	10443063	Phf1	10403748	NA							10447084	Galm
						10338306	NA							10478907	Pard6b	10506488	Ppap2b	10341942	NA							10447254	Ppm1b
						10490872	Lrrcc1							10478997	Tfap2c	10468231	Arl3	10527158	Fscn1							10447275	Camkmt
						10340964	NA							10479074	NA	10339153	NA	10562397	NA							10447594	Dynlt1a
						10340220	NA							10479274	Cdh4	10589087	Prkar2a	10343107	NA							10447629	Tagap1
						10343677	NA							10479852	Camk1d	10399148	Rapgef5	10369825	Gm5172							10447860	Pnldc1
						10436698	N6amt1							10479925	Proser2	10341721	NA	10532620	Myo18b							10447897	Wtap
						10362974	Hace1							10479933	NA	10340432	NA	10373651	NA							10448030	NA
						10503523	Ggh							10480254	Cacnb2	10464283	NA	10354368	NA							10448192	NA
						10606858	Tceal8							10480490	NA	10342303	NA	10479172	NA							10448214	Zfp944
						10571774	Aga							10480912	Lhx3	10572398	Crlf1	10496862	NA							10448235	Zfp945
						10507273	Pik3r3							10481056	Notch1	10501183	Eps8l3	10410475	NA							10448495	1600002H07Rik
						10372130	4930430F08Rik							10482788	NA	10467768	Loxl4	10395737	NA							10449236	Nme4
						10492499	Mfsd1							10482793	NA	10513608	Alad	10458870	NA							10449471	Srpk1
						10339712	NA							10483559	NA	10410959	Atg10	10340304	NA							10449527	Stk38
						10536429	Tmem106b							10483561	Gorasp2	10340126	NA	10350749	Gm5531							10449602	Ccdc167
						10469322	Vim							10483768	NA	10342410	NA	10552351	NA							10449839	Akap8
						10340131	NA							10483797	1700109F18Rik	10458226	Hspa9	10511721	NA							10449854	Akap8l
						10398459	Ppp2r5c							10484482	Rtn4rl2	10463875	Sorcs3	10383502	Slc16a3							10449914	Zfp871
						10343769	NA							10484618	Olfr1083-ps	10366653	Wif1	10541522	Rps2							10449971	Zfp763
						10543226	2610001J05Rik							10484764	Olfr1208	10608697	Tlr5	10339788	NA							10449989	Zfp422
						10569273	Mob2							10485027	F2	10399874	Bcap29	10569308	Krtap5-1							10449991	Zfp81
						10581289	Atp6v0d1							10485445	Ehf	10370000	Gstt1	10586039	Tle3							10449999	Zfp101
						10397081	Rbm25							10486041	Meis2	10408629	Pxdc1	10356170	NA							10450006	Hnrnpm
						10598507	Slc38a5							10486324	Mapkbp1	10355958	Ube2v1	10495592	NA							10450206	Rnf5
						10376929	Tvp23b							10487380	NA	10339148	NA	10473584	NA							10451039	Slc25a27
						10485635	Eif3m							10487605	F830045P16Rik	10360684	Ephx1	10344231	NA							10451860	Pot1b
						10358459	BC003331							10487613	Pdyn	10466925	Ak3	10340995	NA							10451884	NA
						10424113	Mal2							10487886	Adra1d	10343721	NA	10341087	NA							10452110	2410015M20Rik
						10343062	NA							10488124	Sel1l2	10343973	NA	10604505	6720401G13Rik							10452213	Gtf2f1
						10551431	Zfp607							10488366	Nkx2-2	10370497	Pdxk	10566512	NA							10452525	Ndufv2
						10338695	NA							10488378	Thbd	10344981	Pi15	10447415	NA							10452633	Tgif1
						10341480	NA							10488617	Nrsn2	10411668	Ocln	10365727	NA							10452643	Myl12a
						10338974	NA							10488862	Ggt7	10343402	NA	10601593	NA							10452658	Smchd1
						10411882	Nln							10489045	Rpl37a	10583847	Bbs9	10351489	NA							10452860	Memo1
						10437590	Carhsp1							10489239	9430008C03Rik	10367641	Mthfd1l	10419726	NA							10452867	Dpy30
						10514732	Slc35d1							10489562	Spata25	10524668	Coq5	10591997	Adamts8							10453102	Srsf7
						10340282	NA							10489891	B4galt5	10356997	NA	10356461	Hjurp							10453114	Dhx57
						10467003	Ppp1r2-ps3							10489961	Nfatc2	10507418	Eif2b3	10405741	NA							10453555	2610044O15Rik8
						10516027	Rlf							10490129	Bmp7	10349166	Serpinb10	10360128	Rpl27							10453766	Thoc1
						10496742	2410004B18Rik							10490611	Ptk6	10569618	Ano1	10523843	NA							10453900	Riok3
						10440729	Krtap7-1							10491064	NA	10338727	NA	10578025	NA							10454093	Mrpl27
						10338810	NA							10491474	NA	10532767	Ssh1	10341774	NA							10454099	Morf4l1
						10339614	NA							10491920	Elf2	10350516	Ptgs2	10425761	NA							10454154	Dsg3
						10390979	Krt31							10492006	Trpc4	10508479	Ptp4a2	10344322	NA							10454202	Rnf138
						10556820	Tmem159							10492755	Fga	10338772	NA	10574147	NA							10454298	Zfp397
						10606609	Tspan6							10492983	Fcrl5	10580457	N4bp1	10606579	Rps12							10454332	Elp2
						10342064	NA							10493345	NA	10456423	Seh1l	10547655	NA							10454398	AW554918
						10544148	Jhdm1d							10494423	Hfe2	10339602	NA	10472467	NA							10454469	Ammecr1l
						10343637	NA							10494441	Ankrd34a	10509379	Usp48	10442254	NA							10454483	Wdr33
						10396161	Tmx1							10495042	Ppm1j	10360506	Akt3	10408861	Adtrp							10454831	Paip2
						10528332	Napepld							10495107	Adora3	10594161	Arih1	10429949	Rpl29							10454877	Pura
						10364909	Oaz1							10496405	Gm5105	10585381	Slc35f2	10595791	NA							10454966	Ik
						10382300	Map2k6							10497663	Slc7a14	10526848	A430033K04Rik	10579765	NA							10455312	Rbm27
						10405013	Ippk							10497711	Ndufb5	10586174	NA	10340916	NA							10455346	Tcerg1
						10542993	Pon3							10497998	NA	10341868	NA	10342744	NA							10455588	Hspe1
						10564507	Arrdc4							10499198	Gm12191	10446986	Crim1	10515706	Szt2							10455769	Csnk1g3
						10469720	Acbd5							10500677	Cd2	10341211	NA	10342705	NA							10455989	Rbm22
						10375935	Skp1a							10501020	Chi3l3	10537146	Akr1b8	10396059	Rpl17							10456120	Csnk1a1
						10410351	AA987161							10501063	Cd53	10584600	NA	10451547	Gm16494							10456194	Napg
						10580010	Pkn1							10501319	Celsr2	10590821	9230110C19Rik	10512487	Rmrp							10456346	Sec11c
						10338683	NA							10501433	Fndc7	10512067	Ddx58	10340866	NA							10456414	Psmg2
						10458757	Morf4l1							10501454	Henmt1	10340402	NA	10455338	Rpl21							10456793	Ier3ip1
						10388377	Srr							10501494	Amy2a5	10342021	NA	10402512	Scarna13							10456798	Hdhd2
						10505747	Rraga							10501922	Snhg8	10472058	Rif1	10339809	NA							10457054	Zadh2
						10349383	Slc35f5							10502613	AI747448	10540493	Edem1	10357120	NA							10457183	Tmx3
						10341273	NA							10502622	Clca3	10342830	NA	10394850	NA							10457223	2610005L07Rik
						10355554	Aamp							10503148	NA	10419542	Tmem55b	10370070	NA							10457225	Map3k8
						10436865	Ifngr2							10504613	E230008N13Rik	10602062	Prps1	10460585	Fosl1							10457235	Zfp438
						10424746	Zfp623							10504617	E230008N13Rik	10340379	NA	10501179	Rpl13							10457250	Arhgap12
						10523955	Dr1							10504650	E230008N13Rik	10439268	Dtx3l	10400004	Mir680-3							10457331	Mzt1
						10492598	Nmd3							10504666	E230008N13Rik	10339681	NA	10417702	NA							10457357	Mpp7
						10490370	Psma7							10504690	Tmod1	10405511	Ddx46	10549976	NA							10457409	Usp14
						10389674	Dynll2							10504728	Foxe1	10476314	Prnp	10596747	Sema3f							10457465	Esco1
						10589929	Cmtm6							10505879	Ifna7	10339374	NA	10340807	NA							10457862	Rprd1a
						10474596	Aven							10505911	Dmrta1	10344111	NA	10561474	Ifnl2							10458164	Cdc23
						10395831	Brms1l							10506150	Foxd3	10506743	0610037L13Rik	10339976	NA							10458293	Dnajc18
						10534142	Sbds							10506274	Dnajc6	10383168	NA	10343550	NA							10459296	Fbxo38
						10597883	Ano10							10506330	NA	10582712	Egln1	10500345	Terc							10459375	Txnl1
						10592126	Fam118b							10506433	Dab1	10406672	Arsb	10342389	NA							10459481	Lman1
						10359181	Tor3a							10507131	Tal1	10364712	Cirbp	10339894	NA							10459723	Elac1
						10556576	1110004F10Rik							10507456	Tctex1d4	10341010	NA	10491058	Rprl2							10459768	NA
						10341561	NA							10507576	Olfr1331	10422748	C9	10574100	Nlrc5							10459837	8030462N17Rik
						10469514	Bmi1							10507580	Lao1	10509601	Tmco4	10591773	Hmgn2							10459844	Haus1
						10387648	Tmem102							10507742	Col9a2	10526687	Ppp1r35	10344399	NA							10459905	Setbp1
						10361790	Fuca2							10507798	Mycl	10430851	Cyp2d22	10343355	NA							10459962	Atp9b
						10455656	Hsd17b4							10507840	Heyl	10365845	Fgd6	10343793	NA							10460517	Brms1
						10375343	Rnf145							10508412	Fndc5	10401238	Zfp36l1	10349100	NA							10461176	Stx5a
						10492480	Gfm1							10508663	Laptm5	10467344	Noc3l	10554817	Gapdh							10461191	Nxf1
						10478590	Zswim1							10508909	NA	10531729	Coq2	10341194	NA							10461475	Cpsf7
						10606714	Gla							10508953	Trim63	10494351	Mtmr11	10522409	NA							10462100	Sarnp
						10384968	Bod1							10509030	Runx3	10494889	Dennd2c	10342637	NA							10462102	Ptar1
						10570013	Abhd13							10510025	Agmat	10522606	Exoc1	10439887	NA							10462193	Ndufb4
						10509267	Wnt4							10510053	Lrrc38	10341128	NA	10457731	Rpl35							10462195	Kank1
						10400170	Prkd1							10510090	Gm13103	10502776	Lphn2	10424557	NA							10462237	Smarca2
						10506643	Tmem59							10510447	Casz1	10428534	Trps1	10342518	NA							10462281	Vldlr
						10472923	Ak4							10511665	Necab1	10386951	Hs3st3b1	10339982	NA							10462333	Cdc37l1
						10346255	Ormdl1							10511719	NA	10480224	Trdmt1	10606542	NA							10462454	Uhrf2
						10397332	Eif2b2							10511877	NA	10588505	Abhd14b	10339734	NA							10462918	Slc35g1
						10396652	Hspa2							10512254	1110017D15Rik	10341262	NA	10598222	Gm2837							10463140	Lcor
						10495549	Dbt							10512653	NA	10530819	Hopx	10564877	Rccd1							10463153	Morf4l1
						10342488	NA							10513190	D630039A03Rik	10342568	NA	10365134	NA							10463173	Zdhhc16
						10339402	NA							10513666	Akna	10473570	Olfr1148	10340449	NA							10463486	Btrc
						10514779	Prkaa2							10513822	NA	10494551	Acp6	10339599	NA							10463826	Sfr1
						10497441	Gyg							10513880	NA	10338396	NA	10338965	NA							10464084	Tcf7l2
						10341280	NA							10513912	Aldoart1	10442986	Luc7l	10437149	NA							10464445	NA
						10461237	Bscl2							10514309	Ifna13	10341880	NA	10576795	NA							10464479	Ppp6r3
						10390258	Snx11							10514319	Klhl9	10361139	Traf5	10482073	NA							10464659	Rad9a
						10574656	Fbxl8							10514340	Cdkn2a	10506968	Ttc39a	10353773	Gm15455							10465336	Mrpl49
						10414325	Cgrrf1							10514347	Cdkn2b	10350331	Zfp281	10341455	NA							10465559	Vegfb
						10372682	Slc35e3							10515159	Foxd2	10343974	NA	10343563	NA							10465686	Rtn3
						10453918	3110002H16Rik							10515162	Foxe3	10590654	Aasdhppt	10504000	Dnaja1							10465701	Lgals12
						10352867	Plxna2							10515427	NA	10485948	Grem1	10467256	Rpl10							10465826	AI462493
						10410975	Zcchc9							10515696	Szt2	10341748	NA	10552488	Klk10							10465980	Sdhaf2
						10382139	Psmd12							10515797	Tmem125	10572949	Nr3c2	10378427	Olfr401							10466274	NA
						10582978	Msantd4							10515826	Olfr1337	10514049	Nfib	10340939	NA							10466402	Eif4a1
						10576524	Sprtn							10515924	Rimkla	10458808	Fem1c	10546337	NA							10466676	1110059E24Rik
						10346191	Stat1							10516101	Oxct2a	10342728	NA	10353002	NA							10466682	Smc5
						10603087	Pir							10516566	C77080	10405047	Aspn	10517141	Hmgn2							10466818	Cbwd1
						10577534	Vdac3							10516620	Lck	10464030	Adra2a	10499937	NA							10466938	Plgrkt
						10447799	Igf2r							10516776	NA	10407481	Pfkp	10341297	NA							10467091	Atad1
						10397818	Cpsf2							10516852	Oprd1	10369835	Phyhipl	10511496	NA							10467470	Aldh18a1
						10540507	H3f3a							10517165	Cd52	10343640	NA	10604599	NA							10467688	Exosc1
						10469575	Gm13363							10517250	Extl1	10502780	Lphn2	10363735	Egr2							10468089	Mgea5
						10589889	Glb1							10517287	Man1c1	10584827	Mpzl2	10339689	NA							10468131	9130011E15Rik
						10351013	Rc3h1							10517488	Ephb2	10356154	Sphkap	10341694	NA							10468639	Dclre1a
						10369702	Tet1							10517513	C1qc	10459866	Slc14a1	10384766	NA							10468762	4930506M07Rik
						10548875	Art4							10517664	NA	10435769	Zbtb20	10497929	NA							10468789	Pdzd8
						10338565	NA							10517687	Gm16287	10607089	Acsl4	10515714	Szt2							10468802	D19Ertd737e
						10410264	Mterfd1							10518473	Fbxo6	10556113	Rbm3	10415013	NA							10469035	Sephs1
						10596053	Pccb							10518686	Pik3cd	10520483	Ept1	10568215	Gm4532							10469300	Ankrd16
						10552824	Rras							10518833	Camta1	10484894	Ptprj	10453047	Gm9374							10469732	Yme1l1
						10342052	NA							10518909	Rnf207	10486172	Rmdn3	10465831	5730408K05Rik							10469856	Dph7
						10449394	Taf11							10519048	Actrt2	10541845	Nop2	10468448	NA							10470322	Surf2
						10364038	Upb1							10519344	NA	10456254	Nedd4l	10362536	NA							10470893	Set
						10507894	Rragc							10519486	NA	10438690	Rfc4	10394142	Hmgb1							10471675	Glo1
						10455007	Zmat2							10519514	NA	10390789	Krt24	10341309	NA							10471784	Rabgap1
						10359723	Tiprl							10519644	Gm6455	10341687	NA	10347481	Cyp27a1							10472277	March7
						10472589	Phospho2							10519675	Gm8912	10338380	NA	10567995	Nupr1							10472300	Psmd14
						10512915	Tmem246							10519913	Magi2	10349138	Serpinb11	10343045	NA							10472440	Tax1bp3
						10479809	Rps28							10520247	1700022A21Rik	10585988	Myo9a	10440909	NA							10472549	Bbs5
						10341997	NA							10521596	NA	10339756	NA	10525885	Ubc							10472570	Ppig
						10342180	NA							10521811	NA	10499881	Rpl3	10350335	Hmbs							10472598	Klhl23
						10512088	Topors							10522208	Uchl1	10542764	Arntl2	10492424	NA							10472605	Ssb
						10375667	Rnf130							10523497	1700007G11Rik	10434645	Senp2	10580590	Gapdh							10472893	Zak
						10406598	Serinc5							10523506	Bmp3	10481518	Ptges	10344356	NA							10473690	Fnbp4
						10495993	Elovl6							10523672	NA	10341240	NA	10340368	NA							10473779	NA
						10558057	Wdr11							10523758	Lrrc8b	10364194	Lss	10444995	NA							10473847	Acp2
						10580370	Dnaja2							10523901	NA	10391143	Klhl11	10348030	NA							10474006	Phf21a
						10384474	Pno1							10524234	Galnt9	10339860	NA	10599088	Spin2-ps1							10474419	Lgr4
						10380289	Mmd							10524264	NA	10338578	NA	10340618	NA							10474588	Emc7
						10576056	Map1lc3b							10524555	Mvk	10589982	Azi2	10339160	NA							10474671	Spred1
						10600403	Fam50a							10524955	Tesc	10437778	Parn	10535852	Slc7a1							10474836	Ivd
						10441064	Dscr3							10524969	Hrk	10343145	NA	10528721	Galnt11							10475335	Pdia3
						10340074	NA							10525069	Lhx5	10357535	Pfkfb2	10340380	NA							10475665	Usp8
						10426081	Fam19a5							10525086	Slc8b1	10379153	Aldoc	10343862	NA							10475686	Ap4e1
						10424335	Rnf139							10525103	Iqcd	10344535	NA	10447429	NA							10475866	Bcl2l11
						10374983	Asb3							10525923	NA	10393936	Cbr2	10552240	Zfp507							10475890	Mertk
						10538547	Fkbp9							10526452	Upk3bl	10444637	Vwa7	10405969	NA							10475941	Zc3h6
						10407907	Rala							10526541	NA	10369116	Mcm9	10339613	NA							10475981	Chchd5
						10594631	Aph1b							10526866	Gm5294	10387922	Slc25a11	10339890	NA							10476620	Snrpb2
						10426689	Spats2							10526956	Uncx	10384725	Rel	10391561	Pyy							10476834	Xrn2
						10434998	Ncbp2							10527182	E130309D02Rik	10581575	Gm1943	10558533	NA							10476939	Zfp937
						10389775	Pctp							10527565	Pdx1	10578810	Clcn3	10342312	NA							10476969	Pygb
						10350684	Arpc5							10527638	Alox5ap	10561831	Zfp566	10597074	NA							10477073	Csnk2a1
						10502522	Hs2st1							10528036	NA	10420837	Extl3	10424381	NA							10477167	Mcts2
						10547009	Vgll4							10528548	Kcnh2	10372815	Lemd3	10578045	Nrg1							10477353	Mapre1
						10427718	Brix1							10528617	Gbx1	10378572	Tlcd2	10339822	NA							10477370	Tomm20
						10341197	NA							10528686	Crygn	10441952	2210404J11Rik	10417310	NA							10477604	Itch
						10601878	Tceal1							10528925	3110082J24Rik	10495371	Aknad1	10341223	NA							10478447	Stk4
						10379176	Unc119							10529077	Ucn	10340720	NA	10343168	NA							10478943	Pfdn4
						10547471	B4galnt3							10529237	Yes1	10475965	Polr1b	10545192	Rprl1							10479077	Vapb
						10380238	Mrps23							10529711	Clnk	10433228	Cluap1	10338651	NA							10479217	Gm14420
						10497587	Yae1d1							10529819	Fgfbp1	10386636	Usp22	10477001	NA							10479268	Wtap
						10567022	Btbd10							10530142	Klf3	10339022	NA	10532588	Myo18b							10479627	Tpd52l2
						10544462	Fam115a							10530310	Bend4	10344147	NA	10424676	Ly6e							10479649	Prpf6
						10578829	Palld							10531420	Cxcl11	10538932	Amd1	10340378	NA							10479869	Cdc123
						10344010	NA							10531737	Hpse	10341504	NA	10556571	Rpl19							10479887	Sec61a2
						10552125	Pepd							10531790	Nkx6-1	10408975	Kif13a	10516906	Snora73b							10480381	Arhgap21
						10601778	Armcx3							10532030	NA	10582069	Sdr42e1	10343171	NA							10480423	Abi1
						10496110	Papss1							10532277	Vmn2r12	10516487	Gjb4	10341705	NA							10480842	Tmem141
						10506188	Pgm2							10532346	P2rx2	10422512	Ggact	10608373	Ssty2							10481383	Wdr34
						10501208	Gstm6							10532517	Cryba4	10402473	Clmn	10387907	Pld2							10481531	BC005624
						10601760	Hnrnph2							10532586	Myo18b	10485622	Qser1	10421258	Pdlim2							10481845	Mvb12b
						10529858	Tapt1							10532590	Myo18b	10416371	Lpar6	10510505	NA							10481900	Rabepk
						10568988	Bet1l							10532744	Selplg	10426909	Letmd1	10557960	Tgfb1i1							10482109	Mrrf
						10497964	Pgrmc2							10532888	4930515G01Rik	10339810	NA	10551626	Lgals4							10482139	Pdcl
						10465209	Fam89b							10534152	Wbscr17	10546829	Oxtr	10400334	Rpl31							10482144	Rc3h2
						10536818	Calu							10534395	Cldn4	10343381	NA	10569288	Krtap5-4							10482172	Zbtb26
						10574985	Slc7a6							10534537	Srcrb4d	10602925	Phka2	10344244	NA							10482177	Strbp
						10459590	Ptpn2							10534883	Irs3	10436500	Gbe1	10521757	NA							10482200	Dennd1a
						10341334	NA							10534986	Mir93	10351636	Alyref2	10407511	NA							10482229	Psmb7
						10394477	Laptm4a							10535065	Adap1	10521972	Pcdh7	10341385	NA							10482273	Golga1
						10352092	Zbtb18							10535225	Grifin	10445360	Supt3	10343477	NA							10482301	Scai
						10452907	Fez2							10535310	Foxk1	10343903	NA	10584819	NA							10482467	Orc4
						10530641	Usp46							10535435	Zfp316	10584334	Siae	10347460	Ttll4							10482496	NA
						10371616	Chpt1							10535900	NA	10338945	NA	10344364	NA							10482687	Arl5a
						10367717	Ginm1							10536041	C87414	10342586	NA	10579659	Hmgn2							10482824	Acvr1
						10425078	Mpst							10536118	NA	10532901	NA	10587653	Snx14							10482880	Baz2b
						10591472	Cdc37							10536143	NA	10568233	9130019O22Rik	10427885	Gm5803							10483548	Mettl5
						10592106	Tirap							10536898	Irf5	10340161	NA	10342386	NA							10483865	Fkbp7
						10539135	Capg							10537098	1700012A03Rik	10541075	Cxcl12	10599670	NA							10484249	Cwc22
						10570437	Fbxo25							10537624	Tcrb-J	10340809	NA	10534964	Rps25							10484351	Sumo2
						10343934	NA							10537809	Olfr444	10450145	Psmb9	10529817	Rpl15							10484999	Ddb2
						10604922	BC023829							10538159	NA	10531197	Adamts3	10583952	Ncapd3							10485191	Prdm11
						10360563	Smyd3							10538271	NA	10541307	Usp18	10339759	NA							10485282	Alkbh3
						10583326	Slc36a4							10538482	Adcyap1r1	10339655	NA	10506201	Ror1							10485294	Hsd17b12
						10410590	Exoc3							10538890	NA	10342945	NA	10399657	NA							10485340	Itpa
						10542965	Sgce							10538957	NA	10342467	NA	10520942	Plb1							10485395	Trim44
						10451213	Rsph9							10538979	Cd8b1	10503161	Chd7	10344465	NA							10485514	Caprin1
						10439642	Slc35a5							10538993	Cd8a	10389373	Appbp2	10338605	NA							10485624	Prrg4
						10585338	Kdelc2							10539218	NA	10340983	NA	10479215	Rps8							10485656	Elp4
						10343741	NA							10539802	Bmp10	10342657	NA	10535626	Rpl29							10485830	Emc4
						10360321	Dusp23							10539954	NA	10383152	NA	10439651	Cd200							10486026	Zfp770
						10564313	Mphosph10							10540213	NA	10350630	Fam129a	10342548	NA							10486029	Dph6
						10467368	Ctdspl2							10540931	Raf1	10439463	Timmdc1	10338742	NA							10486499	Tmem87a
						10540141	Ccdc174							10542237	NA	10466374	Tle4	10422655	NA							10486552	Lrrc57
						10554142	Kansl2							10542319	Apold1	10548038	Ntf3	10360185	NA							10486595	Ttbk2
						10567049	Copb1							10542371	NA	10368748	Amd1	10495675	F3							10486616	Ubr1
						10477777	Ergic3							10542983	Pon1	10359816	Pogk	10373052	B4galnt1							10486710	Lcmt2
						10499545	Efna3							10543052	Rps27a	10338802	NA	10590265	NA							10486712	Zscan29
						10522589	Srd5a3							10543145	Thsd7a	10554938	Rab30	10354247	Fhl2							10486722	Trp53bp1
						10338076	NA							10543460	Tmem229a	10353311	Jph1	10341579	NA							10487359	Itpripl1
						10583785	Swsap1							10543676	NA	10531193	Adamts3	10516079	Oxct2b							10487453	Nphp1
						10587012	Ccpg1							10543680	Mir182	10495243	Gstm5	10569456	NA							10487690	Fastkd5
						10343828	NA							10544438	Olfr456	10488938	Fam83c	10340361	NA							10487969	Trmt6
						10343163	NA							10545130	Gadd45a	10344519	NA	10342443	NA							10488090	Tasp1
						10524588	Ankrd13a							10545184	NA	10557326	Il4ra	10424347	NA							10488195	Rrbp1
						10506269	Ak4							10545187	Igk	10434925	Hes1	10538704	NA							10488237	Snx5
						10340934	NA							10545252	NA	10342893	NA	10399178	Cdca7l							10488982	Cpne1
						10340094	NA							10545638	Tlx2	10578037	Eif3h	10512937	Rnu1b1							10489018	Rbm39
						10581737	Ddx19b							10546098	Dnajb8	10568228	Zfp747	10338979	NA							10489041	Pdcd10
						10520010	Pmpcb							10546240	Vmn1r49	10503200	Chd7	10562729	NA							10489253	Zhx3
						10524436	Usp30							10546510	Lrig1	10573956	Slc6a2	10452151	Rfx2							10489553	Acot8
						10513320	Ptgr1							10546817	Ssu2	10565315	Fah	10445239	NA							10489936	Adnp
						10470936	Tbc1d13							10547686	NA	10441456	Synj2	10341028	NA							10489946	Dpm1
						10528102	Crot							10547793	Rnu7	10344205	NA	10554162	NA							10490232	2210418O10Rik
						10440037	Nit2							10547888	Gpr162	10338837	NA	10342793	NA							10490276	Gm14288
						10343182	NA							10550167	NA	10340684	NA	10583318	Taf1d							10490291	Gm14430
						10352393	Srp9							10550383	Dact3	10339462	NA	10346114	NA							10490294	Gm6710
						10563068	Prrg2							10550509	Pglyrp1	10453857	Gata6	10505888	Ifna5							10490736	Rgs19
						10480699	Dpp7							10550514	Nova2	10341242	NA	10445741	NA							10490773	Hnrnph2
						10341948	NA							10550698	Ckm	10477061	Srxn1	10342814	NA							10490894	E2f5
						10471715	Mrrf							10550723	Nkpd1	10501164	Csf1	10537880	NA							10490955	Mtfr1
						10556957	BC030336							10550768	Vmn1r122	10344183	NA	10497349	Sirpb1a							10491106	Pld1
						10595205	2410127L17Rik							10550770	Vmn1r114	10539727	C87436	10340849	NA							10491279	Prkci
						10440284	4930453N24Rik							10550925	Zfp428	10385236	Gm6644	10344593	NA							10491354	Zfp639
						10414522	Apex1							10550998	NA	10430255	Foxred2	10361640	NA							10491438	Ttc14
						10357043	Bcl2							10551226	Cyp2a4	10341538	NA	10487643	Rpl27a							10491455	Fxr1
						10447224	Dync2li1							10551282	Cyp2a5	10481474	Crat	10344334	NA							10491486	Atp11b
						10538282	Cbx3							10551287	Cyp2a12	10447354	Tmx2	10437627	Rpl35a							10491551	Exosc9
						10585428	Dnaja4							10551696	Rasgrp4	10603011	Rbbp7	10425880	Prr5							10491564	4932438A13Rik
						10461487	Cyb561a3							10551750	NA	10363541	Ass1	10338561	NA							10491597	4932438A13Rik
						10449386	D17Wsu92e							10551801	NA	10341168	NA	10339715	NA							10491607	4932438A13Rik
						10478160	Fam83d							10551883	Tyrobp	10339656	NA	10344531	NA							10491820	3110057O12Rik
						10456764	Smad2							10551891	Nfkbid	10338783	NA	10454733	Rpl29							10491825	3110057O12Rik
						10514405	Plaa							10552284	Pin4	10342516	NA	10516908	Snora73a							10492049	Supt20
						10440388	Hspa13							10552288	Vstm2b	10439936	Nfkbiz	10608671	A730008H23Rik							10492205	Eif2a
						10517436	Pithd1							10552608	Klk1b3	10398039	Serpina3f	10340706	NA							10492220	Selt
						10477644	Trp53inp2							10552942	Lhb	10505982	Fggy	10341160	NA							10492325	Ube2v1
						10562500	Dpy19l3							10554160	NA	10344321	NA	10443344	NA							10492438	Lekr1
						10565204	Bnc1							10554321	NA	10568461	Rfwd3	10339073	NA							10492456	Rsrc1
						10394102	Wdr45b							10554650	NA	10402787	NA	10515132	NA							10492671	Ppid
						10344072	NA							10554725	Olfr299	10406193	Ccdc127	10433717	NA							10492757	Plrg1
						10516479	Rps28							10554837	Eed	10343771	NA	10550482	Igfl3							10492997	Etv3
						10556280	Swap70							10555186	Wnt11	10497001	Cryz	10339266	NA							10493086	Hdgf
						10355456	Mreg							10555785	Olfr598	10339861	NA	10342838	NA							10493193	Cct3
						10581729	Ddx19a							10555789	Usp17lc	10573939	Lpcat2	10342089	NA							10493243	NA
						10411199	Aggf1							10556059	Rbmxl2	10341185	NA	10344348	NA							10493519	Shc1
						10339787	NA							10556214	NA	10490690	Uckl1	10596095	Ephb1							10493585	Ube2q1
						10447025	Gpatch11							10556573	NA	10341259	NA	10427266	Rpl39							10493626	1700094D03Rik
						10393177	Acox1							10556611	NA	10531177	Adamts3	10458283	NA							10493995	S100a10
						10495651	Alg14							10557060	NA	10387838	Alox12e	10344449	NA							10494299	Ensa
						10489904	Spata2							10557177	Prkcb	10504504	Grhpr	10474199	NA							10494372	Sv2a
						10549842	Zfp667							10557231	NA	10338815	NA	10512024	Mob3b							10494452	Rbm8a
						10372831	Tbc1d30							10557591	Itgal	10365518	Nt5dc3	10461921	2410127L17Rik							10494574	Prkab2
						10420637	Kpna3							10558049	Ppapdc1a	10435525	Iqcb1	10403246	NA							10494583	Sec22b
						10416510	Nufip1							10558118	Btbd16	10386775	Prpsap2	10340487	NA							10494662	Ywhah
						10411156	Scamp1							10558265	Lhpp	10447361	Ttc7	10512322	Ccl19							10494857	Nras
						10431726	Yaf2							10558580	Utf1	10433633	Mkl2	10499512	Mir92b							10494924	Trim33
						10516932	Sesn2							10558649	Olfr46	10507309	Ccdc17	10368222	4930444G20Rik							10495012	Phtf1
						10581073	Dync1li2							10560298	NA	10482030	Stom	10500293	NA							10495147	Dennd2d
						10594835	Polr2m							10560395	Psg20	10372618	Frs2	10341577	NA							10495173	Lrif1
						10531304	Cdkl2							10560429	Mypop	10515396	Btbd19	10343329	NA							10495279	Psma5
						10590245	Slc25a38							10560459	Vasp	10553788	Atp10a	10343989	NA							10495574	Sass6
						10496796	Ssx2ip							10560744	Vmn1r117	10440576	Ltn1	10562663	Rps4x							10495773	Dnttip2
						10566804	Tmem9b							10560803	Gm5891	10343457	NA	10443492	Rpl21							10495830	Sec24d
						10459918	Rbfa							10560983	Dedd2	10502778	Lphn2	10338134	NA							10495935	4930422G04Rik
						10546402	Zfyve20							10562287	NA	10426835	Dip2b	10560618	Apoc1							10496032	Rpl12
						10567335	Gde1							10562408	Chst8	10455901	Slc27a6	10338317	NA							10496130	Tbck
						10494060	Mrpl9							10562784	Mybpc2	10491621	4932438A13Rik	10420614	Sacs							10496159	Ints12
						10482323	Ppp6c							10563377	Sult2b1	10491617	4932438A13Rik	10338446	NA							10496295	Ube2d3
						10385926	Cdc42se2							10563608	NA	10343525	NA	10374777	Efemp1							10496629	2015-09-01
						10521602	Cpeb2							10563740	Mrgprx1	10490826	Zbtb10	10556206	Snora3							10496638	Odf2l
						10603266	Nudt10							10563768	NA	10342508	NA	10343644	NA							10496822	Gng5
						10504817	Tgfbr1							10563812	NA	10574104	Nlrc5	10580516	NA							10496892	Fubp1
						10585874	Hexa							10563825	NA	10545065	Gprin3	10339207	NA							10497066	Zranb2
						10571696	Casp3							10563911	NA	10530100	Arap2	10342474	NA							10497285	Impa1
						10509204	Tcea3							10563927	NA	10407709	Mtr	10338934	NA							10497548	Fndc3b
						10555671	Pgap2							10563929	NA	10342292	NA	10413517	Chdh							10497754	Dnajc19
						10456814	Pias2							10564073	NA	10427849	6030458C11Rik									10497931	Cflar
						10522430	Dcun1d4							10564137	NA	10348493	Lrrfip1									10497944	Mfsd8
						10452892	Fam98a							10564159	Snord116	10413100	Kat6b									10498146	Nhlrc3
						10501456	Fam102b							10564183	Snord116	10497636	NA									10498160	Ufm1
						10585099	Usp28							10564203	NA	10585980	Myo9a									10498296	Commd2
						10514568	Tm2d1							10564233	Mir344	10338716	NA									10498485	Slc33a1
						10565519	Tmem126b							10564237	NA	10429341	Ptk2									10498519	Ssr3
						10428714	Slc22a22							10565292	Arnt2	10339658	NA									10498837	Etfdh
						10532944	Mlec							10565389	Olfr307	10344575	NA									10499168	Kirrel
						10471129	Ncs1							10565395	Olfr303	10338476	NA									10499187	Ube2l3
						10363231	Smpdl3a							10565924	Relt	10343266	NA									10499273	Rrnad1
						10504458	Clta							10566168	Olfr33	10341326	NA									10499536	Efna1
						10486284	Ndufaf1							10566409	Olfr670	10341067	NA									10500009	Rpl31
						10593740	Wdr61							10566611	Olfr707	10421768	Akap11									10500091	Scnm1
						10458213	Etf1							10566666	NA	10574145	Nlrc5									10500253	Prpf3
						10501629	Cdc14a							10567108	Sox6	10574157	Nlrc5									10500304	Vps45
						10341769	NA							10567825	Lat	10549282	Itpr2									10500362	Polr3gl
						10570975	Tm2d2							10568188	Tbc1d10b	10362794	Ppil6									10500434	Bcl9
						10351277	Nme7							10568202	2001-09-01	10386992	NA									10500928	Capza1
						10601915	Fam199x							10569385	Ascl2	10343781	NA									10501091	Rbm15
						10546791	Sumf1							10570189	Sox1	10595327	Phip									10501358	Sars
						10367337	Rnf41							10571005	Letm2	10533462	Rad9b									10501447	Prpf38b
						10597648	Myd88							10571364	NA	10408531	Gmds									10501661	Srsf3
						10350766	Stx6							10571737	NA	10342411	NA									10501734	Palmd
						10486166	Ccdc32							10573077	Usp38	10464425	Grk5									10501778	Ptbp2
						10533285	Ptpn11							10573288	Palm3	10491619	4932438A13Rik									10501860	Fnbp1l
						10475957	Ttl							10573626	Gpt2	10507076	Skint3									10501909	Mettl14
						10566454	Prkcdbp							10573691	Gm10638	10538214	Fam221a									10502029	Larp7
						10338347	NA							10574153	Nlrc5	10390691	Nr1d1									10502417	2410002F23Rik
						10427015	Acvr1b							10574161	Nlrc5	10341846	NA									10502714	Rpf1
						10375382	Clint1							10574288	Ccdc135	10502774	Lphn2									10503036	Srsf11
						10342261	NA							10574375	NA	10503723	Mdn1									10503085	Tgs1
						10341682	NA							10574415	NA	10342652	NA									10503283	1110037F02Rik
						10400984	Tmem30b							10575151	NA	10574149	Nlrc5									10503484	Rmdn1
						10338854	NA							10575702	Clec3a	10343717	NA									10503570	Sfrs18
						10401805	Snw1							10575750	Bcmo1	10341733	NA									10503584	Coq3
						10474411	Lin7c							10575775	Cmip	10343933	NA									10503711	Casp8ap2
						10356339	Pde6d							10575917	Wfdc1	10341140	NA									10503828	Lyrm2
						10409330	4833439L19Rik							10576054	Foxl1	10396606	Syne2									10503845	Ube2j1
						10372417	Atxn7l3b							10577190	Rasa3	10339233	NA									10503911	Polr1d
						10494821	Tspan2							10577441	Defb9	10340060	NA									10503926	Rars2
						10465395	Ppp2r5b							10577449	Atp7b	10495001	Rsbn1									10504064	Nudt2
						10577910	Fnta							10577994	Gm8096	10341622	NA									10504375	Npr2
						10431284	Brd1							10578425	AY512931	10532085	Tgfbr3									10504730	Anp32b
						10343299	NA							10579101	Cilp2	10338939	NA									10505073	Zfp462
						10352294	Sde2							10579341	Mpv17l2	10491613	4932438A13Rik									10505461	Atp6v1g1
						10531919	Hsd17b11							10579825	Pou4f2	10542302	Crebl2									10505630	Snapc3
						10350247	Kif21b							10580058	NA	10341409	NA									10505996	Fggy
						10444665	Ddah2							10580061	Il27ra	10585976	Myo9a									10505998	Fggy
						10592850	Trappc4							10580510	Sall1	10573027	Otud4									10506058	Inadl
						10566405	Lamtor3							10580522	Tox3	10368886	NA									10506254	Raver2
						10375234	Nudcd2							10580532	NA	10339876	NA									10506298	Leprot
						10599222	Ube2a							10580635	Ces1d	10475946	Zc3h6									10506496	NA
						10502071	5730508B09Rik							10581605	Hp	10414269	Bnip3									10506603	Ssbp3
						10412421	Zfp131							10581640	NA	10537318	Trim24									10506736	Magoh
						10512728	Tstd2							10582287	Car5a	10585982	Myo9a									10506893	Nrd1
						10339963	NA							10582578	NA	10338994	NA									10507099	Trabd2b
						10477929	1110008F13Rik							10582694	Fam89a	10341441	NA									10507784	Ppt1
						10519607	Tmem243							10582997	Casp4	10479979	Slc25a36									10507804	Trit1
						10415784	Trim13							10583071	Mmp3	10356262	Csprs									10507885	Mycbp
						10440600	Cct8							10583929	B3gat1	10491615	4932438A13Rik									10507914	Sf3a3
						10338540	NA							10584325	Vsig2	10586781	Myo1e									10508019	Gnl2
						10533869	Ccdc92							10584500	Olfr963	10338870	NA									10508042	Meaf6
						10371607	Dram1							10585276	Pou2af1	10422781	Rictor									10508182	Psmb2
						10491182	Eif5a2							10585703	Rpp25	10574098	Nlrc5									10508228	Zmym6
						10502232	Aimp1							10588081	Foxl2	10574135	Nlrc5									10508490	Srsf5
						10473356	Ube2l6							10588638	Tmem115	10523595	Ptpn13									10509023	Syf2
						10437942	Ube2v2							10588720	Rbm6	10427471	Osmr									10509071	NA
						10608656	Ublcp1							10589057	Mir191	10359078	Cep350									10509228	Hnrnpr
						10343028	NA							10589640	Prss46	10545135	Il12rb2									10509246	Luzp1
						10385365	Lsm11							10589654	Als2cl	10439710	Phldb2									10509463	Eif4g3
						10608422	Rmi1							10589790	NA	10573344	Mir27a									10509858	Sdhb
						10596812	Fam212a							10589909	Trim71	10603708	Cask									10510129	Dhrs3
						10591643	Rab3d							10589911	NA	10453049	Cdc42ep3									10510142	Smarca5-ps
						10343887	NA							10589938	Gpd1l	10342091	NA									10510982	Pex10
						10343907	NA							10589955	Stt3b	10338105	NA									10511113	Cdk11b
						10446804	Slc30a6							10590149	Xylb	10545780	Exoc6b									10511382	Nsmaf
						10435015	Wdr53							10590427	Ackr2	10513156	Ptpn3									10511952	Orc3
						10344545	NA							10590623	Cxcr6	10420338	Pspc1									10512011	Zfp292
						10530615	Ociad2							10591281	Col5a3	10587558	Dopey1									10512061	Taf9
						10519007	Tprgl							10591418	Zglp1	10567213	NA									10512851	Erp44
						10490672	Arfrp1							10591624	Dock6	10343509	NA									10512901	Mrpl50
						10468929	Nmt2							10591978	Ntm	10363007	Ascc3									10513195	Txn1
						10505064	Tmem38b							10592160	Gm6762	10599435	Ocrl									10513869	Megf9
						10447619	Rsph3a							10592303	Robo3	10547553	Mical3									10514000	Mpdz
						10577144	Dcun1d2							10592447	NA	10342910	NA									10514173	Rpl34
						10458046	Nrep							10592471	Gramd1b	10338542	NA									10514383	Larp7
						10410332	Zfp58							10592515	Ubash3b	10585978	Myo9a									10514590	Dock7
						10550730	Zfp296							10593167	NA	10341023	NA									10514713	Wdr78
						10372716	Rap1b							10594747	C2cd4b	10557782	Hsd3b7									10515012	Prpf38a
						10345230	Rab23							10594998	Leo1	10338421	NA									10515363	Mmachc
						10456723	BC031181							10595145	Gm8074	10574133	Nlrc5									10516022	NA
						10439239	Dirc2							10595159	Ooep	10360542	Cox20									10516296	Thrap3
						10342997	NA							10595169	NA	10340971	NA									10516348	2003-08-01
						10341145	NA							10595496	Snap91	10400072	Scin									10516435	Zmym4
						10344604	NA							10595768	Pls1	10339848	NA									10516551	S100pbp
						10461898	Rfk							10595798	BC043934	10397112	Papln									10516605	Hdac1
						10339097	NA							10595836	E030011O05Rik	10340647	NA									10516778	Zcchc17
						10341531	NA							10596023	Sox14	10437151	Kcnj15									10516884	Trnau1ap
						10555179	Prkrir							10596070	NA	10503363	Rbm12b1									10516943	Atpif1
						10516213	Akirin1							10596409	Col6a5	10574102	Nlrc5									10517147	Dhdds
						10477970	Src							10596521	Grm2	10339033	NA									10517328	Tmem50a
						10497996	Ikzf5							10597182	Nbeal2	10574139	Nlrc5									10517336	Clic4
						10534921	Mepce							10597258	Tmie	10555011	Nars2									10517421	Pnrc2
						10388241	Ctns							10597266	Als2cl	10385893	Slc22a4									10517443	Tceb3
						10379184	Slc46a1							10597309	Stac	10340953	NA									10517559	Cdc42
						10595404	Fam46a							10598075	NA	10495059	St7l									10518346	Gm13251
						10488687	Pdrg1							10598077	NA	10503178	Chd7									10518361	Smarca5
						10391454	Vat1							10598549	Ssx9	10344339	NA									10518366	Zfp933
						10465278	Cdc42ep2							10599001	Agtr2	10455873	Slc12a2									10518532	Tardbp
						10551355	Sertad3							10599243	Rnf113a1	10503204	Chd7									10519241	Ttll10
						10373826	Gal3st1							10599317	NA	10430649	Cbx7									10519392	Krit1
						10485151	Mapk8ip1							10600533	NA	10338799	NA									10519420	Akap9
						10500610	Fam46c							10601152	Nlgn3	10408937	Atxn1									10519504	Sri
						10391540	Mpp2							10601764	NA	10395932	Ctage5									10519516	Slc25a40
						10343753	NA							10602284	Ott	10408902	Mcur1									10519713	NA
						10598664	Atp6ap2							10602722	Spin2c	10344537	NA									10519747	Sema3e
						10343018	NA							10602733	NA	10495896	Camk2d									10519945	Tmem60
						10454580	Bin1							10603228	NA	10503170	Chd7									10520124	Sumo2
						10524781	Rab35							10603308	Mir188	10440621	Grik1									10520288	Galnt11
						10525016	Tbx3							10603543	Fthl17	10412126	Il31ra									10520815	Slc4a1ap
						10435226	Snx4							10603698	Gm1549	10357870	Prelp									10520833	Mrpl33
						10374106	Ykt6							10603746	Maob	10342932	NA									10520982	Depdc5
						10465379	Snx15							10603814	Slc9a7	10431266	Cerk									10521031	Ywhah
						10535841	Slc46a3							10603953	Gm5169	10342017	NA									10521057	Maea
						10361682	Ppil4							10604403	Elf4	10338258	NA									10521543	Stx18
						10445875	Btg3							10605051	Trex2	10363281	Ranbp2									10521555	Lyar
						10496023	Casp6							10605431	Rab39b	10520096	Klhl7									10521690	Ppih
						10379998	Trim37							10605505	NA	10540472	Bhlhe40									10521813	Nsfl1c
						10380260	Trim25							10605666	Mageb18	10574151	Nlrc5									10521848	Zcchc4
						10516765	Serinc2							10606060	NA	10441787	Airn									10521863	Anapc4
						10341233	NA							10606083	Cited1	10340506	NA									10521927	Tbc1d19
						10399540	Pqlc3							10606184	Mir374	10463200	Hoga1									10521969	Immp1l
						10426292	Alg10b							10606600	Pcdh19	10498273	Tm4sf1									10522149	Ube2k
						10515072	Rnf11							10606725	NA	10574137	Nlrc5									10522160	N4bp2
						10516229	Utp11l							10606936	NA	10503220	Chd7									10522303	Guf1
						10488303	Crnkl1							10607557	NA	10340333	NA									10522668	Paics
						10602474	Phf8							10607560	NA	10341520	NA									10522676	Srp72
						10578539	Slc25a4							10608018	NA	10338068	NA									10522802	Ythdc1
						10386123	A430005L14Rik							10608087	NA	10608720	Ccdc82									10523001	Mob1b
						10340651	NA							10608212	Sly	10486203	Ino80									10523365	Mrpl1
						10488816	Ahcy							10608263	Sly	10488322	Ralgapa2									10523727	Pkd2
						10467907	Erlin1							10608282	Gm20815	10341006	NA									10523785	Zfp326
						10341921	NA							10608365	Ssty2	10342301	NA									10523905	Mtf2
						10372728	Cdc5l							10608371	NA	10420596	Tnfrsf19									10524004	Pcgf3
						10498038	Elf2							10608424	Ssty1	10344422	NA									10524018	Rpl34
						10582474	Chmp1a							10608554	NA	10389025	Myo1d									10524020	Tmem175
						10359754	Mpzl1							10608637	Gm5483	10585331	Exph5									10524079	NA
						10546092	Rab7							10608664	NA	10505705	Sh3gl2									10524150	Ankle2
						10606436	Hmgn5									10340156	NA									10525158	Oas1b
						10343744	NA									10545168	Tacstd2									10525381	Vps29
						10417689	Psmd6									10574159	Nlrc5									10525397	Arpc3
						10400395	Ppp2r3c									10514466	Jun									10525419	P2rx7
						10402142	Ccdc88c									10340730	NA									10525452	Rnf34
						10506004	Hook1									10568785	Bnip3									10525780	Tctn2
						10542321	Ddx47									10596041	Il20rb									10525877	Zfp664
						10377416	2310047M10Rik									10341580	NA									10525887	Bri3bp
						10342131	NA									10358259	Nek7									10526069	Cct6a
						10339751	NA									10440019	Tmem45a									10526106	Vkorc1l1
						10512156	Aqp3									10401616	Mlh3									10526250	Abhd11
						10339406	NA									10374560	Zrsr1									10526319	Baz1b
						10515352	Akr1a1									10503180	Chd7									10526502	Rabl5
						10339086	NA									10343673	NA									10526726	Zkscan1
						10563659	Spty2d1									10574143	Nlrc5									10526743	Cops6
						10498180	Rfxap									10343259	NA									10526842	Zfp157
						10393614	Cbx8									10449712	Cbs									10527268	Pms2
						10596043	Nck1									10368947	Aim1									10527306	Lmtk2
						10524681	Triap1									10513154	Ptpn3									10527475	Zfp655
						10418210	Tmem254a									10585986	Myo9a									10527528	Smarce1
						10338615	NA									10585984	Myo9a									10527624	Uspl1
						10354418	Nabp1									10405686	NA									10527694	B3galtl
						10432492	Faim2									10341571	NA									10527888	Gatad1
						10456699	Acaa2									10384566	NA									10527918	Mterf
						10417972	Camk2g									10342229	NA									10527936	Fzd1
						10394093	BC017643									10343785	NA									10528120	Dmtf1
						10398920	BC022687									10344523	NA									10528238	Phtf2
						10593671	Dmxl2									10340023	NA									10528484	Srpk2
						10344952	Rdh10									10338355	NA									10528507	Pus7
						10424833	Maf1									10423333	Fam134b									10528523	Tomm7
						10409684	2210016F16Rik									10527832	Pds5b									10528583	Cdk5
						10364251	Pofut2									10338851	NA									10528880	Lmbr1
						10342947	NA									10491605	4932438A13Rik									10529995	Dhx15
						10339829	NA									10574163	Nlrc5									10530163	Rfc1
						10339127	NA									10395227	Cog5									10530592	NA
						10483563	Tlk1									10344396	NA									10530892	Cenpc1
						10367931	Ltv1									10428837	NA									10531215	Ankrd17
						10437364	Adcy9									10344553	NA									10531323	G3bp2
						10393320	Ube2o									10338115	NA									10531383	Sdad1
						10343030	NA									10466606	Anxa1									10531428	Nup54
						10342221	NA									10513152	Ptpn3									10531529	Cnot6l
						10511755	Wwp1									10338907	NA									10531633	Hnrnpd
						10338085	NA									10573823	Chd9									10531776	Fam175a
						10343149	NA									10396511	Syne2									10532150	Fam69a
						10424400	Myc									10513158	Ptpn3									10532157	Tmed5
						10340580	NA									10578504	1700029J07Rik									10532310	4930522L14Rik
						10496169	Ppa2									10450982	Gpr115									10532332	Pgam5
						10362922	Atg5									10396485	Syne2									10533026	Prkab1
						10480027	Zbtb2									10374035	Xbp1									10533237	Oas1c
						10501676	Hiat1									10342926	NA									10533446	Tctn1
						10382516	Kctd2									10559837	Vmn2r29									10533483	Atp2a2
						10385239	Mat2b									10342941	NA									10533504	Ift81
						10338528	NA									10340358	NA									10534575	Prkrip1
						10396402	Prkch									10342774	NA									10534660	Ap1s1
						10351119	Vamp4									10344144	NA									10534694	Srrt
						10415262	Dcaf11									10381695	NA									10534966	Zfp113
						10343970	NA									10343514	NA									10535034	Zfp68
						10571728	Rwdd4a									10394625	Nbas									10535247	Iqce
						10593213	Rbm7									10343685	NA									10535629	Pdap1
						10345482	Cnnm4									10338468	NA									10535946	N4bp2l2
						10362829	Ostm1									10533367	Acad10									10536273	Casd1
						10441359	NA									10362294	Arhgap18									10536376	Mios
						10591009	Med17									10342136	NA									10536494	Cav2
						10435470	Kpna1									10338867	NA									10536595	Naa38
						10385036	Fgf18									10497773	Mccc1									10537102	Exoc4
						10455472	Dcp2									10341616	NA									10537184	Cald1
						10528227	Gnai1									10342514	NA									10537316	Atp6v0c
						10475437	Sord									10448094	Lnpep									10537353	Ttc26
						10340729	NA									10353989	NA									10537397	Luc7l2
						10452980	Eif2ak2									10375265	Atp10b									10537494	Ssbp1
						10516007	Zmpste24									10342938	NA									10537712	Gstk1
						10435897	BC027231									10356601	Per2									10537849	Arhgef5
						10385361	Ublcp1									10460118	Socs6									10537934	Zfp212
						10562251	Scn1b									10363868	Fam13c									10538201	Malsu1
						10340553	NA									10435789	NA									10538318	Tax1bp1
						10498064	Setd7									10441902	Smoc2									10538356	Chn2
						10346960	Ccnyl1									10450069	H2-K2									10538413	Znrf2
						10369604	Vps26a									10556456	Tead1									10538755	Smarcad1
						10600377	Atp6ap1									10468795	Rab11fip2									10538857	Serbp1
						10420237	Ube2j2									10342165	NA									10538963	Rpl34
						10601449	Sh3bgrl									10571274	Gsr									10539002	Rnf103
						10342295	NA									10339904	NA									10539026	Immt
						10338876	NA									10514558	NA									10539104	0610030E20Rik
						10483770	Lnp									10453276	Thada									10539220	Gcfc2
						10603485	Ebp									10595466	Pgm3									10539649	Ptges3
						10529741	Rab28									10414433	Tmem260									10539741	Aak1
						10547056	Tmem40									10339269	NA									10539766	Aak1
						10340512	NA									10423049	Prlr									10539769	Nfu1
						10339874	NA									10591241	Zfp426									10540273	Ube2v2
						10404996	Ninj1									10338713	NA									10540480	Arl8b
						10493103	Isg20l2									10437992	Dnm1l									10540935	Cand2
						10499666	Atp8b2									10341788	NA									10540952	Ift122
						10344042	NA									10575993	6430548M08Rik									10541104	Hnrnpf
						10396074	Mgat2									10341188	NA									10541191	Rad52
						10563852	Nipa1									10454809	Matr3									10541216	Kdm5a
						10394471	Sdc1									10562911	Tbc1d17									10541484	M6pr
						10379779	Ddx52									10403193	Sp4									10541545	Necap1
						10568332	Prss8									10397145	Acot2									10541785	Acrbp
						10363445	4632428N05Rik									10595753	Trpc1									10542221	Mir680-1
						10344380	NA									10354472	Gls									10542376	Rpl36al
						10604523	Rap2c									10342272	NA									10542665	Cmas
						10467139	Lipa									10340746	NA									10542745	Fgfr1op2
						10551760	Zfp84									10381738	Wnt3									10542885	2810474O19Rik
						10452556	Rab12									10444459	Tnxb									10543512	Zfp800
						10541067	Eif4a3									10343560	NA									10543709	Tmem209
						10339805	NA									10343064	NA									10543783	Psma3
						10530633	Sgcb									10522335	Atp10d									10543835	Chchd3
						10531899	Klhl8									10584578	Snord14d									10543904	Cnot4
						10530201	Ugdh									10342369	NA									10544015	Ybx1
						10384486	Etaa1									10489266	Chd6									10544219	Braf
						10342442	NA									10410656	Cast									10544525	Pdia4
						10409799	Isca1									10453867	Rbbp8									10544720	Hnrnpa2b1
						10395328	Snx13									10450948	9130008F23Rik									10544732	Skap2
						10480275	Nebl									10425601	Tef									10544768	Hoxa5
						10530832	Noa1									10510162	Ppp2r5a									10545339	Mrpl35
						10421214	Rhobtb2									10421749	Akap11									10545346	Ptcd3
						10450694	H2-T22									10533659	Clip1									10545394	Rnf181
						10526113	Crcp									10530683	Chic2									10545576	Mrpl19
						10396177	Actr10									10355227	Kansl1l									10545629	Htra2
						10504743	Nans									10408455	Cdkal1									10545697	Dguok
						10346576	Stradb									10340337	NA									10545760	Paip2b
						10344137	NA									10573342	Mir23a									10546066	Isy1
						10365601	Gnptab									10343699	NA									10546538	Suclg2
						10496397	Lamtor3									10592531	NA									10546567	Eogt
						10357917	Tmem183a									10340253	NA									10546760	Ddx3x
						10340191	NA									10340227	NA									10547410	Erc1
						10473547	Srp9									10346722	Nbeal1									10547936	Gapdh
						10545583	Pole4									10527213	Daglb									10548030	Cd9
						10544815	Hibadh									10586244	Dennd4a									10548727	D230041D01Rik
						10525439	P2rx4									10574141	Nlrc5									10548899	Rerg
						10556598	Xylt1									10443527	Pim1									10549402	Ergic2
						10377695	Phf23									10343807	NA									10549445	NA
						10412011	Kif2a									10582719	Sipa1l2									10549447	Ipo8
						10481135	Surf1									10341568	NA									10549473	Caprin2
						10343876	NA									10341966	NA									10549497	Fam60a
						10454632	Camk4									10339001	NA									10549536	Amn1
						10389842	Utp18									10518679	Nmnat1									10549552	Prpf31
						10338576	NA									10589800	Clasp2									10549569	Cnot3
						10603478	Tbc1d25									10503182	Chd7									10549615	Leng8
						10599514	Bcorl1									10502772	Lphn2									10549899	Zfp418
						10409031	Dek									10362104	Slc2a12									10550003	Zfp606
						10391612	Atxn7l3									10338818	NA									10551423	Zfp626
						10506870	Txndc12									10339276	NA									10551426	Zfp59
						10342577	NA									10342871	NA									10551464	Fbl
						10350777	Acbd6									10544976	Kbtbd2									10551815	Zfp260
						10341016	NA									10343740	NA									10551865	Alkbh6
						10357003	Rnf152									10339801	NA									10551981	U2af1l4
						10509930	Fbxo42									10595109	Lrrc1									10552030	Gapdhs
						10374430	Wdr92									10560709	Pvr									10552242	Rpl17
						10339040	NA									10399457	Gm6644									10552264	Zfp939
						10595288	Tmem30a									10343878	NA									10552320	Zfp788
						10408162	Zfp322a									10554375	Sema4b									10552440	Zfp719
						10593713	Cib2									10343800	NA									10552681	Josd2
						10436967	Cbr1									10513145	Ptpn3									10553568	Tubgcp5
						10372743	Cdc5l									10498978	Lrat									10553913	Mcee
						10430510	Tmem184b									10344143	NA									10553993	Snrpa1
						10463112	Ccnj									10343881	NA									10554392	Gdpgp1
						10338322	NA									10345183	Cdk10									10554839	Picalm
						10492335	Rap2b									10472097	Fmnl2									10555055	Ndufc2
						10564805	Pex11a									10342953	NA									10556216	Ipo7
						10340366	NA									10349953	Chit1									10556246	Zfp143
						10520513	Slc35f6									10355464	Pecr									10556426	Parva
						10592237	Ei24									10396421	Hif1a									10556764	Ppp1cc
						10579894	Hhip									10390022	Rsad1									10557033	NA
						10522090	Wdr19									10338925	NA									10557206	Rbbp6
						10344505	NA									10386652	Aldh3a2									10557213	Rbbp6
						10418193	Plac9a									10427461	Ptger4									10557233	Tnrc6a
						10498309	Pfn2									10397249	Lin52									10557355	D430042O09Rik
						10380514	Fam117a									10367843	Utrn									10557853	NA
						10339980	NA									10394833	NA									10558295	NA
						10410452	Srd5a1									10422436	Dock9									10558436	BC005624
						10593492	Zc3h12c									10553813	Ube3a									10558847	Phrf1
						10355152	Fzd5									10599736	Fhl1									10558914	Rplp2
						10432923	Spryd3									10368675	Marcks									10559558	Tnni3
						10454993	Hars2									10339767	NA									10560043	Zfp329
						10342193	NA									10343921	NA									10560070	Ube2m
						10435514	Ildr1									10512022	NA									10560304	Calm3
						10353899	Sema4c									10451481	Gltscr1l									10560816	Atp5g2
						10357158	Ralb									10600593	Hnrnpa3									10560818	Zfp111
						10469110	Usp6nl									10471909	NA									10561345	Zfp780b
						10343078	NA									10418879	Mapk8									10561690	Catsperg1
						10558961	Tspan4									10414460	Naa30									10562320	NA
						10428353	Lrp12									10338617	NA									10562491	Pdcd5
						10539653	Tprkb									10439249	Parp14									10562548	Uri1
						10472916	Cdca7									10571093	Rnf170									10562578	Pop4
						10507500	Slc6a9									10338168	NA									10562605	AI987944
						10338519	NA									10449284	Dusp1									10563260	Snrnp70
						10388520	Glod4									10339748	NA									10563649	Uevld
						10574976	Pla2g15									10508917	Aim1l									10563829	Mrps33
						10340924	NA									10340641	NA									10564343	Tjp1
						10401267	Dcaf5									10339392	NA									10564436	Asb7
						10381697	Hexim1									10519988	Fam185a									10564563	Rpl17
						10416379	Sucla2									10432540	Lima1									10565072	Sec11a
						10394429	1110057K04Rik									10513455	Mup2									10565081	Timm17a
						10442643	Nme3									10590844	Arhgap42									10565193	Hdgfrp3
						10380689	Cbx1									10396008	Prpf39									10565330	Zfand6
						10396064	Txndc9									10493307	NA									10565514	Tmem126a
						10480714	Uap1l1									10607346	Tspyl2									10565547	Pcf11
																10344347	NA									10565612	Aamdc
																10531166	Adamts3									10565712	Acer3
																10341513	NA									10565738	2210018M11Rik
																10402249	Atxn3									10565862	Pold3
																10341847	NA									10565873	Ppme1
																10356345	Nppc									10566050	Il18bp
																10344382	NA									10566161	Trim68
																10353219	Sumo2									10566281	Dnajc19
																10460696	Slc25a45									10567043	Rras2
																10503168	Chd7									10567103	Rpl5
																10440186	Crybg3									10567173	Pik3c2a
																10343895	NA									10568221	Sephs2
																10594802	Fam63b									10568328	Vkorc1
																10343481	NA									10568355	Pycard
																10357363	Nckap5									10568859	Ndufab1
																10375360	Ebf1									10569306	Krtap5-1
																10404402	Foxq1									10569569	Cttn
																10524327	Mn1									10569830	Camsap3
																10338294	NA									10569985	Zfp958
																10540283	Ppp4r2									10569994	Hmgb1
																10443027	Crebrf									10570119	Carkd
																10607562	Cnksr2									10570397	Cdc16
																10342634	NA									10570666	NA
																10440560	Ltn1									10570771	Vps36
																10343729	NA									10570786	Thsd1
																10578572	Stox2									10570957	Sfrp1
																10472034	Lypd6									10570982	Fgfr1
																10463404	Fam178a									10571415	Vps37a
																10383532	Narf									10571474	Pcm1
																10342644	NA									10571621	Ufsp2
																10352661	Ptpn14									10571647	4933411K20Rik
																10339015	NA									10572161	Zfp930
																10384795	Cyb5d1									10572253	Sugp1
																10361918	Il20ra									10572419	Ell
																10341855	NA									10572449	Lsm4
																10396956	Pcnx									10572596	Babam1
																10504499	Zcchc7									10572730	Zfp617
																10341229	NA									10572989	Slc10a7
																10482434	Gtdc1									10573048	Anapc10
																10341451	NA									10573703	Cnep1r1
																10363786	Ank3									10574436	Khdrbs1
																10491721	Spry1									10574456	Cklf
																10459703	NA									10574632	Cbfb
																10361807	Hivep2									10574718	Tmem208
																10342810	NA									10574812	Ctcf
																10363641	Herc4									10575302	Ap1g1
																10401149	Plek2									10575363	Zfp612
																10602977	Scml2									10575609	Zfp1
																10551435	9530053A07Rik									10576373	Gas8
																10365971	Btg1									10576391	Rab4a
																10412082	Gpbp1									10576403	Urb2
																10599200	Pgrmc1									10576661	Itgb1
																10591022	4931406C07Rik									10576924	Arglu1
																10513268	AI314180									10577070	Tubgcp3
																10400326	Eapp									10577230	Erich1
																10514072	Zdhhc21									10577395	2610005L07Rik
																10587446	Myo6									10577412	6820431F20Rik
																10596072	Ppp2r3a									10577544	Polb
																10498802	Rapgef2									10577598	Lsm6
																10465853	Stxbp3a									10577633	Golga7
																10569280	NA									10577838	Ddhd2
																10496956	Pigk									10577866	Ash2l
																10354868	Fam126b									10577903	4930444A02Rik
																10558134	Plekha1									10578138	Dctn6
																10586700	Rora									10578189	NA
																10338910	NA									10578262	Mir383
																10361065	Mfsd7b									10578287	Cnot7
																10491780	Hspa4l									10578322	Pdgfrl
																10506939	Eps15									10578391	Smarce1
																10503334	Gem									10578574	Stox2
																10546775	Crbn									10578703	Spcs3
																10395538	Pnpla8									10578922	Klhl2
																10342578	NA									10579049	Gm10033
																10403229	Itgb8									10579052	NA
																10400165	Tfb2m									10579079	Zfp869
																10368782	Fig4									10579776	NA
																10440099	St3gal6									10579799	Tmem184c
																10399198	Ncoa4									10579812	Ednra
																10349661	5430435G22Rik									10579830	Rbmxl1
																10365302	A230046K03Rik									10580169	Ccdc130
																10417757	Vps4b									10580391	Itfg1
																10492136	Dclk1									10580486	Brd7
																10540241	Arl6ip5									10580582	4933436C20Rik
																10536505	Met									10580875	Gtl3
																10400336	Snx6									10580986	Rbmxl1
																10363265	Lims1									10581111	Nae1
																10498623	Kpna4									10581473	Slc7a6os
																10497399	Pde7a									10581523	Terf2
																10463410	Fam178a									10581636	Atxn1l
																10583825	Zfp809									10582074	Mphosph6
																10491922	Naa15									10583207	Maml2
																10501832	NA									10583228	Fam76b
																10484371	Calcrl									10583297	Taf1d
																10475987	Setd3									10583312	Taf1d
																10488108	Esf1									10583340	Npm1
																10361323	Cnksr3									10583610	Ilf3
																10555892	Twf1									10583905	2007-09-01
																10340993	NA									10584067	Zbtb44
																10511843	Ufl1									10584071	Prdm10
																10384782	Vrk2									10584162	Tmed2
																10568464	Ate1									10584231	Pus3
																10453178	Map4k3									10584572	Hspa8
																10542264	2700089E24Rik									10584758	Fam103a1
																10497646	Phc3									10585201	Timm8b
																10565437	Tmem135									10585233	Alg9
																10517312	Tmem57									10585301	Rdx
																10565759	Uvrag									10585358	Npat
																10466441	Vps13a									10585444	Ireb2
																10346695	Nbeal1									10585474	Psma4
																10462957	Tbc1d12									10585625	Sin3a
																10479726	Pcmtd2									10585940	NA
																10555303	Pgm2l1									10586064	Anp32a
																10344608	NA									10586130	Aagab
																10438980	Acap2									10586184	Tipin
																10530910	Uba6									10586397	Mtfmt
																10340898	NA									10586441	Oaz2
																10440564	Ltn1									10586477	Ppib
																10419370	Exoc5									10586604	Rps27l
																10573803	Cyld									10586724	Narg2
																10417183	Pcca									10586759	Bnip2
																10361104	Ppp2r5a									10586773	Gtf2a2
																10419038	Ghitm									10586880	Zfp280d
																10437023	Morc3									10587085	Fam214a
																10411899	Trappc13									10587107	Myo5a
																10342684	NA									10587368	Mto1
																10542200	Gabarapl1									10587419	Senp6
																10401473	Aldh6a1									10587651	NA
																10357051	Kdsr									10587695	Mthfs
																10338514	NA									10587892	Atr
																10338399	NA									10588024	Ppia
																10389010	5730455P16Rik									10588049	Copb2
																10341107	NA									10588083	Faim
																10494839	Csde1									10588091	Cep70
																10593799	Scaper									10588419	Aste1
																10338286	NA									10588691	Hyal1
																10422608	Oxct1									10588696	Nat6
																10553897	Mtmr10									10589350	Shisa5
																10441270	Ripk4									10589420	Cdc25a
																10532040	Zfp644									10589756	Epm2aip1
																10347106	Rpe									10589848	Ubp1
																10341810	NA									10590298	Eif1b
																10507040	Spata6									10590389	Nktr
																10339659	NA									10590549	Exosc7
																10580331	Vps35									10590690	Dync2h1
																10497309	Snx16									10590968	Ankrd49
																10490931	Ythdf3									10591035	5830418K08Rik
																10355084	Ndufs1									10591228	Zfp26
																10492180	Rnf13									10591253	Zfp266
																10469255	Prkcq									10591423	Fdx1l
																10491363	Mfn1									10592023	Aplp2
																10435057	Pcyt1a									10592058	Tuba1b
																10482868	Wdsub1									10592084	St3gal4
																10436456	Pros1									10592535	Sorl1
																10577922	Hook3									10592847	Myl6
																10462752	Btaf1									10592856	Ccdc84
																10372965	Usp15									10592919	Arcn1
																10458680	Eif3j1									10592988	Ube4a
																10453616	Mtpap									10593205	Rexo2
																10414449	Ap5m1									10593361	AU019823
																10363379	Micu1									10593508	Ddx10
																10599719	Slc9a6									10593591	Acat1
																10379410	Rhot1									10593918	Ppcdc
																10599997	Mtmr1									10594110	Neo1
																10501420	Stxbp3a									10594183	Senp8
																10421672	Gpalpp1									10594221	Lrrc49
																10365870	Nr2c1									10594289	Glce
																10594661	Tpm1									10594480	Rab11a
																10585533	Dnajb6									10594551	Zfp609
																10406757	Col4a3bp									10594638	Aph1c
																10607694	Syap1									10594785	Rnf111
																10503212	Chd7									10594840	Myzap
																10579852	Mmaa									10594986	Rpl17
																10573954	Capns2									10594988	Mapk6
																10396346	Pcnxl4									10595723	U2surp
																10539773	Gfpt1									10595856	Slc25a36
																10360972	Kcnk2									10595900	Mrps22
																10555414	Rab6a									10595953	Esyt3
																10407833	Ggps1									10596231	Dnajc13
																10553280	Gtf2h1									10596255	Dnajc13
																10516706	Khdrbs1									10596263	Dnajc13
																10480347	Pip4k2a									10596465	Acy1
																10380381	Tob1									10596796	Rbm6
																10345967	Bivm									10597288	Mlh1
																10388996	Crlf3									10597531	Rbms3
																10392261	Smurf2									10597627	Oxsr1
																10589723	Lrrfip2									10597969	Gm10052
																10528257	Rsbn1l									10597973	Lztfl1
																10467110	Lipo1									10598723	Ddx3x
																10505749	Dennd4c									10598839	Rp2h
																10344637	Atp6v1h									10598994	Atp1b3
																10423172	Golph3									10599346	Polr2k
																10457359	Mpp7									10599461	Calm2
																10498379	Igsf10									10599554	Rbmx2
																10426425	Pdzrn4									10599627	Hprt
																10415678	Cab39l									10599855	Eif4e
																10547251	Bms1									10599893	Fmr1
																10361748	Fbxo30									10600093	Zfp185
																10564451	Mef2a									10600235	Abcd1
																10556491	Far1									10600341	Emd
																10359339	Rabgap1l									10600453	Ikbkg
																10347970	Cab39									10600504	Fundc2
																10434888	Opa1									10600512	Brcc3
																10338077	NA									10600545	Hmgb1
																10379321	Rab11fip4									10600688	Tab3
																10519555	Abcb1b									10600836	Msn
																10341875	NA									10600884	Rpl17
																10425834	Samm50									10601164	Nono
																10503188	Chd7									10601551	NA
																10496737	Bcl10									10601610	NA
																10601595	3110007F17Rik									10601819	Gprasp1
																10406466	Tmem161b									10601844	Bhlhb9
																10455738	Snx2									10602795	Eif1ax
																10383993	Ccdc117									10602827	A830080D01Rik
																10395976	Dnajb6									10603469	Rbm3
																10586254	Dennd4a									10603567	Dynlt3
																10463380	Hif1an									10603785	Fundc1
																10338074	NA									10604187	Lamp2
																10471535	Fam129b									10604405	Aifm1
																10586616	Vps13c									10604687	Mmgt1
																10447349	Cript									10605081	Bcap31
																10407392	BC016423									10605172	Naa10
																10604424	Zfp280c									10605319	Ubl4
																10366310	Osbpl8									10605421	Mtcp1
																10596273	Dnajc13									10605507	Zc3h18
																10407916	Yae1d1									10605766	Maged1
																10503502	Ttpa									10605884	Ophn1
																10423963	Eny2									10606160	Rfwd2
																10338674	NA									10606195	Rlim
																10424260	D15Ertd621e									10606263	Atrx
																10351140	Kifap3									10606532	Acp1
																10344078	NA									10606876	Morf4l2
																10457745	Trappc8									10606969	Rbm41
																10341269	NA									10607317	Tsr2
																10381187	Atp6v0a1									10607324	Rpl21
																10342715	NA									10607679	Txlng
																10357249	Steap3									10607774	Mospd2
																10544982	Nt5c3									10607806	Ofd1
																10338835	NA									10607832	Rab9
																10339323	NA									10607972	Kdm5d
																10460202	Suv420h1									10608193	Sry
																10343280	NA									10608645	Mrps10
																10372497	Thap2									10608662	Zfp273
																10515028	Zfyve9									10608682	Timm21
																10462005	Tmem2									10608684	Dynll1
																10482772	Nr4a2									10608695	Gm20939
																10607619	Cdkl5									10608708	Kdelr2
																10472994	Mtx2
																10405074	Nol8
																10599321	Zbtb33
																10607467	Sat1
																10344012	NA
																10583034	Dcun1d5
																10486867	Mfap1a
																10359677	Blzf1
																10417734	Nr1d2
																10574184	Rspry1
																10357115	Dsel
																10599781	Htatsf1
																10353288	Ube2w
																10523206	Uso1
																10579089	Zfp866
																10455602	Dmxl1
																10464153	Nhlrc2
																10438911	Atp13a3
																10396778	Mpp5
																10501402	Gpsm2
																10498827	Fnip2
																10395198	NA
																10406423	Mblac2
																10537882	Cul1
																10474064	Trp53i11
																10579744	Large
																10338709	NA
																10586284	Dpp8
																10492310	Mbnl1
																10356240	Slc16a14
																10491231	Mynn
																10498383	Igsf10
																10366350	Krr1
																10431637	Cpne8
																10352281	Acbd3
																10586227	Dennd4a
																10608138	Ddx3y
																10365899	Ccdc41
																10407766	Lgals8
																10542757	Stk38l
																10552314	Zfp141
																10523563	Cds1
																10406205	Erap1
																10568521	2310057M21Rik
																10524310	Ttc28
																10495405	Slc25a24
																10529260	Prr14l
																10420457	Micu2
																10503222	Chd7
																10536369	C1galt1
																10440566	Ltn1
																10354085	Rev1
																10343350	NA
																10587486	Set
																10464070	Vti1a
																10494445	Lix1l
																10338779	NA
																10473340	Gm13691
																10447742	Map3k4
																10342140	NA
																10587733	Ctsh
																10382321	Kcnj2
																10374821	Smek2
																10503305	1110037F02Rik
																10566846	Dennd5a
																10592655	Arhgef12
																10595805	Rasa2
																10496425	Adh7
																10338075	NA
																10482059	Ggta1
																10418053	Kcnma1
																10490903	Car13
																10578361	Asah1
																10384150	NA
																10494306	Mcl1
																10472764	Dync1i2
																10448424	Pdpk1
																10338604	NA
																10493703	Jtb
																10556658	9030624J02Rik
																10595924	Pik3cb
																10469312	Pter
																10457273	Kif5b
																10498599	Ift80
																10585974	Myo9a
																10389786	Hlf
																10435457	Parp9
																10356833	Stk25
																10533812	Sbno1
																10578207	Lonrf1
																10375175	Slit3
																10437765	Cpped1
																10343633	NA
																10401007	Ppp2r5e
																10397179	Dnal1
																10467921	Chuk
																10571384	Micu3
																10553092	Dbp
																10550029	Zfp110
																10395984	Fam179b
																10503214	Chd7
																10353181	Lactb2
																10369738	Sirt1
																10575512	Cog4
																10338344	NA
																10342532	NA
																10554693	Stard5
																10455238	Ndfip1
																10475912	Tmem87b
																10457948	Slc25a46
																10542310	Cdkn1b
																10492381	Gmps
																10363599	Rufy2
																10408935	NA
																10511368	Impad1
																10434577	Vps8
																10517646	Pla2g2f
																10474243	Cstf3
																10585992	Myo9a
																10525374	Pptc7
																10339726	NA
																10481868	Dnajb6
																10440292	Gm5488
																10374466	Rab1
																10506397	Mier1
																10500614	Man1a2
																10495163	Dram2
																10402783	Ahnak2
																10483648	Ola1
																10498415	Dhx36
																10494832	Sike1
																10438753	Leprel1
																10389752	Nog
																10350646	Edem3
																10558227	Acadsb
																10341164	NA
																10503150	Rab2a
																10604199	Cul4b
																10456727	Dym
																10403934	Isca1
																10535508	Ccz1
																10498386	Igsf10
																10518341	Ppp2r5a
																10595189	Slc17a5
																10350992	Rc3h1
																10522265	Slc30a9
																10565775	Dgat2
																10339161	NA
																10514133	Ttc39b
																10338760	NA
																10474207	Fbxo3
																10444890	Ier3
																10563641	Rap1a
																10378732	Crk
																10377473	Aloxe3
																10429140	Ndrg1
																10359422	Prdx6
																10368527	Hint3
																10569278	NA
																10400191	Strn3
																10536061	Zfp141
																10429691	Fam83h
																10503882	Rngtt
																10452516	Ankrd12
																10341057	NA
																10602068	Mid2
																10423548	Sdc2
																10387014	Map2k4
																10398678	Eif5
																10467258	Myof
																10339296	NA
																10570855	Plat
																10467206	Ppp1r3c
																10604763	Arpc1b
																10576692	Insr
																10343889	NA
																10503176	Chd7
																10510516	Slc2a5
																10422980	Lmbrd2
																10462791	March5
																10491331	Pik3ca
																10339984	NA
																10590452	Abhd5
																10380534	Spop
																10415700	Mtmr6
																10516982	Stx12
																10462683	Pcgf5
																10535095	Zfand2a
																10511541	Dpy19l4
																10365933	Eea1
																10600901	Ar
																10605437	Pls3
																10360479	Cep170
																10584777	Ddx6
																10381049	Rapgefl1
																10395259	Nampt
																10341444	NA
																10596281	Dnajc13
																10503194	Chd7
																10586248	Dennd4a
																10594855	Cgnl1
																10476443	Plcb4
																10342611	NA
																10603651	1810030O07Rik
																10340951	NA
																10417167	Clybl
																10339348	NA
																10509273	NA
																10341606	NA
																10388337	Pafah1b1
																10384579	Ugp2
																10394366	Atad2b
																10340842	NA
																10503206	Chd7
																10369647	Ddx50
																10453026	Prkd3
																10447395	Msh2
																10593605	Cul5
																10586240	Dennd4a
																10447515	U2af1
																10556169	Eif3f
																10420413	Lats2
																10585972	Myo9a
																10409804	Zcchc6
																10503196	Chd7
																10386394	Zfp867
																10558285	Zranb1
																10339779	NA
																10349793	Dstyk
																10439021	Senp5
																10471655	Gsn
																10396358	Ppm1a
																10385466	Sgcd
																10388682	Taok1
																10512226	Dcaf12
																10434559	Ephb3
																10491014	Hltf
																10340607	NA
																10372488	Tmem19
																10340843	NA
																10399825	Dld
																10391963	Nsf
																10340511	NA
																10436561	Usp25
																10511311	Tmem68
																10400668	Nemf
																10339781	NA
																10566326	Trim12a
																10514985	Zyg11b
																10516956	Smpdl3b
																10344512	NA
																10413282	Dennd6a
																10504234	Unc13b
																10375634	Mapk9
																10342761	NA
																10454546	Map3k2
																10585956	Myo9a
																10499996	Snx27
																10578771	Galnt7
																10391513	Dusp3
																10462081	Nsa2
																10406419	Lysmd3
																10472630	Ubr3
																10503218	Chd7
																10463211	Pi4k2a
																10548563	Ptp4a1
																10455784	Gramd3
																10417147	Tm9sf2
																10516994	Fam76a
																10417034	Dnajc3
																10528519	4933427G23Rik
																10496324	Slc39a8
																10368356	Akap7
																10601328	Uprt
																10468253	Nt5c2
																10396926	Srsf5
																10451893	Stap2
																10434248	2510002D24Rik
																10407042	Dimt1
																10406953	Trim23
																10353524	Ogfrl1
																10417869	Anxa7
																10400718	Sos2
																10344561	NA
																10416155	Kctd9
																10357345	Nckap5
																10596543	Rad54l2
																10368162	Pex7
																10361669	Katna1
																10509790	Aldh4a1
																10454172	Dsg2
																10512935	Amd1
																10351574	Dedd
																10498771	Pdcd10
																10365408	Ric8b
																10578619	Cdkn2aip
																10527896	Ankib1
																10607497	Suclg2
																10596277	Dnajc13
																10410877	Polr3g
																10483679	Gpr155
																10349453	Rab3gap1
																10399407	Vsnl1
																10514128	Ttc39b
																10403604	Lyst
																10380660	Hoxb2
																10349174	Serpinb8
																10423155	Mtmr12
																10505587	Kdm4c
																10343737	NA
																10377859	Pld2
																10599925	Styx
																10340306	NA
																10452496	Ralbp1
																10354494	Nab1
																10606376	2610002M06Rik
																10424439	Efr3a
																10338987	NA
																10440881	Paxbp1
																10537078	Mkln1
																10595211	Col12a1
																10561516	Nfkbib
																10366266	Pawr
																10427772	Tars
																10586246	Dennd4a
																10460108	Gnpnat1
																10566993	Galnt18
																10518781	Per3
																10530319	Atp8a1
																10486396	Ehd4
																10596265	Dnajc13
																10573082	Inpp4b
																10492864	Sh3d19
																10461078	Atl3
																10515930	AA415398
																10340587	NA
																10377987	Rabep1
																10481920	Psmd5
																10397189	Ptgr2
																10606355	Cysltr1
																10495625	Dpyd
																10500272	Gm129
																10375290	Slu7
																10452571	Ptprm
																10565819	Slco2b1
																10588357	Acad11
																10573675	Lonp2
																10362676	Cdk19
																10343302	NA
																10389795	Stxbp4
[truncated: 327 more rows]
