# Supplementary material for: In Silico Analysis of the Age-Dependent Evolution of the Transcriptome of Mouse Skin Stem Cells
Source: Cells. 2020 Jan 9;9(1):165. doi: 10.3390/cells9010165 (PMC7016981; doi:10.3390/cells9010165)
Supplement: Supplementary file 1 [file cells-09-00165-s001.zip › Table S2.xlsx]

## Sheet: Hoja1
Table S2. Intramodular connectivity of the epidermal stem cell dynamic expression patterns
1		1.2		1.5		2		2.3.5		3.5		5.3		6		–1.6		–2		–4.2		–4.6		–5		–6
Gene symbol	Intramodular connectivity	Gene symbol	Intramodular connectivity	Gene symbol	Intramodular connectivity	Gene symbol	Intramodular connectivity	Gene symbol	Intramodular connectivity	Gene symbol	Intramodular connectivity	Gene symbol	Intramodular connectivity	Gene symbol	Intramodular connectivity	Gene symbol	Intramodular connectivity	Gene symbol	Intramodular connectivity	Gene symbol	Intramodular connectivity	Gene symbol	Intramodular connectivity	Gene symbol	Intramodular connectivity	Gene symbol	Intramodular connectivity
Stra13	87.9732	Scrg1	72.4581	Zfp458	45.2107	Pfdn2	388.512	Chordc1	55.4026	Gxylt1	19.5139	Strn	47.1016	Btbd16	584.299	Vamp3	672.911	Kif18b	120.963	4931406H21Rik	36.9002	Cir1	107.725	Pcmt1	48.2376	Fxr1	886.199
Zfp414	85.7206	D630045J12Rik	71.3705	Clk1	43.2774	Ptpn12	387.664	Dnajc13	53.6708	4933409K07Rik	18.7374	Zcchc7	46.8486	3110035E14Rik	561.221	Dram2	665.965	Prr11	118.901	Rnu12	36.0903	Zfp608	99.0535	Chsy1	43.2108	Sf3a3	875.995
Hddc2	84.9702	Epb4.1l3	71.2104	Hpgd	40.9607	Arpc5	385.611	Bod1l	52.9378	2310067E19Rik	18.0673	Arid5b	46.4212	Vstm2b	558.115	Csde1	665.64	Spag5	118.094	AY036118	35.5591	Flrt3	98.5601	Uxt	43.1524	Anp32a	871.693
Evl	84.4605	Abi3bp	71.1491	Pdgfc	40.1214	Ccpg1	380.268	Thoc2	52.8721	Gpr21	14.6222	Malat1	45.7933	Ms4a3	557.302	Seh1l	662.553	Incenp	114.865	Pnet-ps	33.9876	Hmcn1	96.4409	Phf5a	42.6833	Tubgcp5	867.621
H2afy2	79.8034	Dlg4	70.2011	Zfp825	40.0097	Arl4a	375.11	3110052M02Rik	51.9842	Zfp407	14.2402	Clk4	45.7132	Tcap	557.255	Kifap3	660.85	Foxm1	114.598	Msmp	33.7221	Zfp760	96.2916	Cdk2ap1	41.8232	Dynlt3	866.05
Ammecr1	79.5811	Msrb1	68.7015	Ube2l3	39.2853	Eif5a2	374.954	Phf20l1	51.9505	Ptpn3	13.9327	Gm7265	44.7607	Gm5294	556.933	Ghitm	659.719	Ncapg	113.477	Fam193b	32.8407	Krcc1	93.8452	Fzd7	40.4186	Tcea1	861.64
Nutf2	77.4199	Ppic	68.4488	Tpt1	38.689	Tgfbr1	373.515	Rap1a	51.9059	9530091C08Rik	13.217	Phxr4	43.4781	Cyp2a12	551.14	Ddx6	659.618	Aspm	113.291	Srek1	32.7741	Golim4	93.5556	Nop10	40.3441	Ufm1	859.686
Inha	76.8037	Vps25	67.6935	Ccdc28a	38.5531	Arfrp1	372.919	Tiparp	51.8477	NA	10.6688	4932438A13Rik	40.2062	Psg20	549.022	Paip1	657.855	Kif22	111.755	Dsp	32.4906	Zfp935	92.1547	Dhx29	40.0969	Casd1	855.427
Galnt14	76.0154	Smtn	67.2477	Usmg5	38.3514	Dnaja2	370.941	Arhgap5	51.6218	F830001A07Rik	8.72565	Gm6712	39.6831	Clnk	543.487	Cul1	653.954	Bub1b	111.565	Rnu2-10	30.4633	Pxdn	91.3532	Camta1	39.85	Med6	855.407
Nabp2	75.7345	Ndufc1	67.148	Ddx26b	37.5966	Calu	369.02	Wapal	51.5836	Prkch	7.77349	Tas2r143	38.9587	1700007G11Rik	541.473	Nt5c2	653.424	Ckap2	111.503	Xlr4b	28.9107	Flrt2	90.2885	Ftsj3	39.6057	Ash2l	854.562
Usmg5	75.5628	Polr2j	66.832	Npm1	35.5273	Atp6ap2	368.25	Rasa1	51.1113	A130014H13Rik	7.52955	Pten	38.7465	P2rx2	541.042	Cul5	652.716	E2f8	111.491	Galnt15	27.8399	Thoc7	89.0674	Agtrap	39.4147	2007-09-01	850.044
C230081A13Rik	75.3877	Dynlrb1	66.5819	S100a1	35.4641	Cpsf2	367.335	Macc1	50.6527	Dock6	7.16103	Cpsf6	36.5733	Sel1l2	540.963	Hspa4l	651.537	Aurkb	111.464	Il22ra1	26.9197	Enox1	88.5875	Sumo2	38.9833	Fmr1	844.867
4930412O13Rik	75.1444	Sdf2	66.2562	Rpl9	34.9327	Tmem30a	363.79	Fam63b	48.4602	Snora20	6.95197	Samd5	35.84	Myh11	537.909	Lgals8	650.55	Kif23	111.454	Vaultrc5	26.6864	Vti1b	87.8359	H2afv	38.8999	Rdx	842.502
Sostdc1	74.8615	Cd68	65.2544	Zfp934	34.5561	Slc25a4	363.629	Gtpbp10	48.346	Fut11	5.9229	Etohi1	34.819	Mageb18	536.368	Timmdc1	649.992	Hmmr	109.317	5830417I10Rik	25.7448	Bnip3l	86.6282	Atic	38.7991	Wdr43	841.496
Syce2	74.498	Trappc1	64.9445	Trp53inp1	34.4813	Tmx1	362.824	Epc2	47.9641	Mir505	5.30207	Kansl1	33.3975	Cxcl11	533.618	Atl3	649.857	Mis18bp1	108.842	4933409K07Rik	25.3893	Hoxc13	85.8435	Trim27	38.6486	Cnep1r1	841.329
Cwh43	74.1922	Cnih4	64.7625	Rps24	34.2845	Vamp4	362.667	Akr1e1	47.5581	Rangrf	4.37924	Lmo7	33.0813	Gm101	531.428	Herc4	645.962	Kif20a	108.118	BC053749	25.0062	Nek6	85.7202	Park7	38.4722	Prpf3	840.229
H2afz	73.7501	Smarcd3	64.6297	Sumo1	34.0052	Cdc37	362.633	Zfml	47.4803	Mir708	3.92015	4933409K07Rik	32.6738	Myo3b	528.195	Ola1	643.91	Prc1	107.875	Gm5589	24.9449	Ppwd1	85.3697	Psma6	38.0525	Rars2	839.17
Erh	73.0818	Zfp825	64.5446	Sec61g	33.9843	Ube2a	361.756	Dnajc1	47.3314	Ptma	3.41779	Zfp738	32.6222	Grid1	527.245	Adss	642.277	Troap	107.629	Rpl24	24.9402	Zfp799	84.9288	E2f6	37.2854	Rnf5	837.442
Ampd3	71.1811	Tnc	64.406	Fkbp3	33.7404	Vdac3	361.673	Mgat4a	47.0501	Gpnmb	2.99054	Rpl5	32.4678	Esrrb	527.166	Rpe	641.966	Nusap1	107.485	Snora74a	24.8457	Pnp	84.6177	Tuba4a	36.7162	Rp2h	836.483
Srsf10	70.427	Mfap2	64.0698	Gclc	33.7278	Sec62	360.661	Ctso	46.0138	Mill2	2.78981	Pof1b	31.9489	Lsm5	526.692	Rnf13	641.744	Ncapd2	107.11	Ott	23.8048	Zfp52	84.476	Mmp24	36.507	Lztfl1	836.353
6720489N17Rik	70.0928	Tle2	63.8675	Usp54	33.3962	Zfp623	360.645	Nsun3	45.9597	Tinagl1	2.78647	Rpl17	30.7809	D630039A03Rik	523.538	A230046K03Rik	640.337	Kif15	106.878	Rps12	23.7999	Tigd2	84.2896	Fh1	36.3793	Ap3m1	835.441
Cox7b	69.821	Rest	63.4727	Rps7	32.476	Ddx52	359.404	Sltm	45.4928	Mmp13	2.23693	1700062I23Rik	29.2393	Actrt2	521.803	Tmem87b	639.933	Cdca3	106.738	Arhgef37	23.3732	Acsl3	83.8822	Tbca	36.1795	Mrpl39	834.771
Zdhhc15	69.6766	Rn4.5s	61.5999	Gm15772	32.2166	3110002H16Rik	359.067	Gm14391	44.9708	Fosb	1.25662	Cd59a	28.8133	Cd8b1	520.83	Cnbp	639.364	Pole	106.639	Rnu3b1	23.3	Lztfl1	83.3278	Mrpl17	35.108	Xrn2	834.456
Nsg1	69.466	Spink2	61.2556	Gm4987	31.5771	Erlin1	359.017	Hmcn1	44.841	Mir24-2	1.10123	AB041803	28.1356	Ptf1a	519.533	Serp1	639.097	Tk1	105.725	Mirlet7e	22.5443	Sft2d1	82.7864	Commd6	34.987	Bclaf1	831.828
Pdzd11	69.3904	Cadm1	60.8777	Rpl36a	31.3326	Sec63	358.577	Arhgap29	44.6526	Slc15a2	1.0098	Hmgb1	28.099	Gm5434	518.22	Jak2	638.599	Tacc3	105.683	Gm14702	22.1144	S100a14	82.3305	Sar1b	34.5087	Txlng	831.529
Npnt	68.7522	Rbx1	59.9826	Rpl17	31.1957	Zfp51	358.511	Prss23	44.5977			Gpatch8	27.7126	Ankrd45	518.103	Aldh6a1	637.81	Kif2c	104.925	Ppp1r12b	20.578	Pank3	81.867	Vrk1	34.4182	Picalm	831.304
Ltbp1	68.4629	2810428I15Rik	59.9543	Hnrnpa3	30.9106	Etf1	358.454	Dnajb4	44.319			Bcl6	26.8196	Olfr1377	517.358	Ythdf3	636.832	Cdkn3	104.715	Rbm33	20.2061	BC016579	81.3157	Sc5d	33.5784	Zfp280d	830.285
Scnn1g	68.151	Sec61g	59.5229	Epha1	30.7705	Actr2	358.444	Cyp2j9	44.0272			Tead1	26.7702	Alppl2	516.002	Ap5m1	636.298	Cdca5	104.624	Mir26a-1	20.1581	Xpa	79.3837	Pdgfa	32.3912	Atp5d	829.191
Rhoc	68.0005	Trappc2l	59.0729	Ddit4	30.2829	Rnf152	358.117	Klhl24	43.9141			Sp140	26.487	Gng13	514.57	4931406C07Rik	635.727	Spc24	104.595	Ptpn3	20.0582	Tmem47	79.2015	Egfl6	32.1674	Hdac1	828.48
Zfp579	67.8312	Hmcn1	58.3938	Ndufa4l2	29.8894	Ginm1	358.051	Rb1cc1	43.849			Vmn2r42	22.8579	Gprc6a	513.854	Yipf6	635.553	Kif11	104.375	Hmgb1	19.2191	Sesn1	79.1169	Suco	31.7701	4933434E20Rik	828.123
Agl	66.9844	Hadha	58.3516	Paqr3	29.8105	Txndc16	357.278	Deptor	42.1683			Kif21a	21.4762	Rbfox1	513.335	Alg5	632.489	Mcm10	104.287	2410089E03Rik	17.4389	Csgalnact1	78.0072	Hat1	31.2486	Slc7a6os	827.465
Kcnn3	66.2456	Lgals1	58.1064	Tmod4	29.1622	Wdr45b	355.979	Spopl	42.0725			Tas2r135	21.4082	Tmem229a	511.993	Golph3	632.356	Hist1h1b	104.277	Mir598	17.434	Plagl1	77.8559	Kti12	31.2317	Zfp955a	826.682
Cks1b	66.0628	Ccdc53	57.9797	Wdr65	28.7319	Hook1	355.695	Csgalnact2	42.0271			NA	19.839	Serp2	511.72	Snx12	630.993	Cdca8	103.343	Gapdh	17.3723	Sdk1	77.6175	Atp5j	30.9882	4930522L14Rik	826.098
Trpv4	65.8886	Smn1	57.8957	Fut2	28.6997	Rap1b	354.825	Pot1a	41.9989			Rpl12	19.1361	Cwc25	511.519	Styx	630.854	Cenpm	103.332	Cspp1	17.0579	St13	77.2155	Gps1	30.1856	Tmem184c	825.953
Tcof1	65.8228	Nt5dc2	57.8514	Apcdd1	28.2621	Casp6	354.622	Zfp949	41.7565			Heg1	18.6032	Ccdc135	509.451	AI314180	628.979	Nek2	102.693	Wipf2	17.0458	Rbm25	76.9408	Tgm5	29.9642	Ccnt1	825.677
Smc4	65.6465	Slc16a7	57.816	Krt77	27.9118	Tiprl	354.605	Sumo1	41.3875			Klf9	18.3622	Robo3	508.767	Tmem19	628.252	Uhrf1	102.621	Dock6	16.451	Sbsn	76.8427	Chst14	29.2769	Ssr3	824.659
Wbscr27	65.6228	Hsbp1	57.7895	Naaladl2	27.7831	Zdhhc2	354.287	Wrn	40.6525			Prkca	17.4069	Hoxb13	508.198	Osbpl9	628.031	Racgap1	102.094	Serpina3n	14.4843	Serping1	75.8621	Ilf2	29.221	Rprd1a	824.217
Hddc3	65.6094	Naa20	57.7787	Uba52	27.2229	Mrps23	354.283	4932438A13Rik	39.542			Rassf9	16.9284	F2	507.554	Efr3a	626.533	Kntc1	101.743	4932438A13Rik	14.0759	Skil	75.8007	Tmem170	28.7534	Mzt1	822.018
Snrpc	65.5103	Pdlim7	57.713	Fzd10	26.9677	Tlk1	354.201	Tfb1m	39.332			Dock5	15.9946	Upk3bl	507.351	Arih1	626.479	Ska3	101.004	Vsig10l	14.047	Lamb1	74.326	Pbx2	28.5745	Arl5a	821.421
Dtx3	64.9909	Vta1	57.4832	Gltp	26.8772	Rala	354.195	Slc15a1	39.2751			Phf15	15.8853	Cbx3	505.393	Pnpla8	626.123	Mki67	100.934	Sh3d21	12.9115	Sgk1	73.6776	Alg3	27.9653	Ifnar1	818.243
Ska2	64.8362	Gng5	57.4482	Rps21	26.5302	Wdr11	352.774	Kdm6a	38.7589			Mir680-2	15.7238	Adcyap1r1	503.939	Smurf2	624.118	Asf1b	100.823	Spock2	12.4665	Ly96	71.4425	Mr1	27.8909	Prpf38a	816.279
Mcts1	64.7696	Chst11	57.4376	Il1f5	26.3742	Aimp1	351.774	Timp3	37.1781			Gm6498	15.096	Gm8912	502.921	Bcap29	623.698	Hist1h2bm	100.787	Macrod2	12.1554	Arhgap24	71.4144	Slc20a1	27.744	Fundc2	814.968
Acsf2	64.5653	Igfbp5	57.3237	Gpha2	26.3631	Top1	350.364	Dapk2	36.8947			Dusp10	14.6488	Rab39b	502.82	Cpne8	622.691	Top2a	100.735	Hspa1a	11.9964	Mrpl32	71.3567	Zmynd19	26.8913	Mlh1	813.761
Steap4	64.2425	B3gnt8	57.1827	Rps17	25.9008	Gm13363	349.84	Tfdp2	36.6529			Zbtb38	14.5198	Grap	502.67	Rapgef2	621.532	Hist1h2be	100.309	Tulp4	11.827	Wbp4	70.4265	Tmem97	26.4823	Selt	813.281
Nup210	63.9061	Hadhb	56.6928	Krtdap	25.7048	Wwp1	348.423	Bckdhb	36.5424			Ahr	12.9964	Rab37	501.361	Ddx3y	620.791	Iqgap3	99.8417	Sema5a	11.7355	Map1b	69.8958	Eef1e1	26.357	Stx8	813.244
Spred3	63.5496	Wfdc3	56.528	F2rl1	25.5524	Nqo1	347.416	Svil	34.0734			Fndc1	12.0324	Spin2c	500.245	Uso1	620.352	Cdca2	99.7413	Hnrnpa3	11.4714	Gm13139	69.0977	Nprl2	26.0963	Pop4	812.267
Rogdi	61.6917	Nrcam	56.1907	Cyp4f39	25.5291	Armcx3	347.082	Tomm22	33.3375			Zbtb16	11.0643	Olfr51	499.023	Cers5	619.51	Sgol1	99.6439	NA	10.5607	Slc7a8	68.8022	Mir24-1	26.0157	Snai2	811.008
Polr2f	61.5347	Ppdpf	55.7584	Txnip	25.4172	BC023829	346.724	Id4	32.9843			Ptpn3	10.5573	Vmn2r12	498.898	Esf1	618.866	Tpx2	99.0288	Ecscr	10.5359	Cnpy2	68.2724	Fkbpl	25.6855	Ufsp2	810.673
Taf1d	61.419	Zfp938	55.5718	Rgs2	25.1774	Rmnd5a	346.027	Faf1	32.8241			Btg2	10.4515	Gm5483	498.46	Mia3	616.697	Cenpf	98.0549	Fabp5	10.4997	Fam60a	67.6996	Robo2	25.6401	Zhx1	809.278
Sod1	61.1204	Ostc	55.3897	Paqr5	25.013	Hnrnph2	345.72	Rbm12b2	32.7947			Gm3579	10.3925	Gm20815	497.868	Dync1i2	614.092	Brip1	97.9721	Map3k12	8.8785	Gtf2e2	67.6702	Cnpy3	25.5422	Gm10052	808.843
Prdm1	60.8297	Snrpe	55.3594	Micall1	24.9649	Actr10	345.667	Rnpc3	30.7544			Il6ra	10.1608	4931440F15Rik	497.374	Gfpt1	613.471	Hist1h2ak	97.9153	Sec61b	8.81975	Rpp30	67.4781	Sdhd	25.3647	Zmym5	808.101
Ube2n	60.5332	Decr1	55.0201	Myl9	24.8337	Dscr3	344.848	Sncg	30.2533			4933411K16Rik	9.97805	Nav1	497.34	Zbtb6	612.804	Dlgap5	97.7941	Erdr1	8.64896	Papss2	67.3239	Ing1	25.1455	Csnk2a1	807.053
Hoxb5	60.5234	Tomm5	54.4789	Rgcc	24.7858	Tceal8	344.53	Hnrnpk	30.0214			Maff	9.76844	Olfr325	497.176	Gm13691	611.312	Bub1	97.6149	Cyp2w1	8.22444	Tlk2	66.3102	Psmb4	24.7565	Gin1	806.913
Mir27b	60.3814	Shmt1	54.3908	Pla2g4f	24.6487	Msantd4	343.537	Mga	29.9793			Sik1	9.6095	C87414	496.021	Ube2w	610.728	Hist1h1a	96.2986	Arntl	8.00885	Angptl7	66.1469	Smim11	24.7451	Zfp664	806.61
2610203C20Rik	60.3261	Spred2	53.9557	Il22ra2	24.5064	Cbr4	343.473	Orc5	29.9679			Eef2k	9.23618	Dydc1	495.486	Ggps1	610.147	D17H6S56E-5	96.2306	Cecr2	7.66566	Akip1	66.0294	Fhl3	23.9407	Ppp6r3	806.148
Alg8	59.7636	Swi5	53.9389	Cobl	24.4716	Upb1	343.189	Dmxl2	28.5183			Pou5f2	9.20718	Kcnk5	495.05	Naa15	609.931	Hist1h3a	96.2175	Ypel1	7.1777	Uchl3	64.7534	Phyhip	23.5614	Vkorc1l1	805.997
Tmem256	58.8901	Ssr2	53.7154	Slain2	24.3614	Snx13	343.044	Abca1	27.3613			Klf5	9.16089	Dmrt2	494.632	Edem3	609.909	Nsl1	95.8915	Grb7	5.56605	Arl15	64.2164	Mlst8	23.3383	Atrx	804.785
Strip2	58.7884	Ccnd3	53.4245	Rplp1	24.0106	Slc36a4	342.501	Zfp738	27.0681			A530032D15Rik	8.45083	Dbh	494.458	Eif2s1	609.275	Casc5	95.3647	BC100530	5.50708	Cspp1	62.8561	Slc19a1	23.0982	Cdc42bpa	804.489
Tma7	58.6495	Med21	53.3091	Ly6c1	23.9158	Fam50a	342.492	2810055G20Rik	26.3475			Lce1c	8.36536	Dhrs7c	494.323	Abcb7	608.822	Ckap2l	94.9398	Klf15	4.98717	Sepp1	62.2147	Smim3	22.6083	Erp44	803.737
Cycs	57.8085	Lef1	53.0231	Dapl1	23.9086	Slc35a5	342.014	Tra2a	25.9035			Gm13306	8.07074	Stac	494.051	Manea	608.505	Neil3	94.8674	Apobec1	4.06905	Tsc22d1	61.7147	Fzd2	22.5045	Erlec1	803.236
Gm13375	57.5799	Snx1	52.7771	Hspa5	23.9076	Btg3	341.499	Rps7	25.4494			Tanc1	7.87329	Mei1	493.855	Appbp2	608.484	Hist1h3f	94.7064	Bmp1	3.71758	Lbh	61.6778	Mir15a	22.3667	Mapre1	803.214
Zfp64	56.6174	Fras1	52.472	Gapdh	23.848	Cir1	341.32	Oas1f	22.3328			Rpl15	7.56597	Pdx1	491.152	Sft2d2	608.459	Hist1h2bc	94.6999	Slc43a2	3.41648	Ccng2	60.2868	Cox5a	22.1728	Prpf4b	802.804
Hoxa3	56.3306	Rab15	52.2433	Smagp	23.8229	Ypel2	341.195	Sema3d	22.013			Nfkbia	7.17692	Pou4f3	491.038	Mkln1	608.06	Pbk	94.5676	Dusp6	2.91287	Inhbb	59.7525	Med31	21.6901	Gnl2	802.442
Lcat	56.2155	Cd24a	51.5795	Defb1	23.5125	Kras	341.083	Azin1	21.9543			Cd55	7.1286	Kcnh2	490.511	Idh3a	608.016	Esco2	94.0709	Krt16	1.28031	Cr1l	58.8788	Msl1	21.6081	Vps37a	802.106
Phlda1	55.934	Slc41a3	51.5045	Cers6	23.5097	Tprkb	340.931	Il1r2	21.8168			Lphn2	7.11278	C2cd4b	490.017	Kif5b	607.763	Cnih2	93.7997			Krt6a	58.6594	9330151L19Rik	21.2661	Ift20	801.643
Commd3	55.8851	St6galnac2	51.0864	Fam198b	23.4811	Trim13	340.917	Rarres1	21.1746			Clca5	7.07672	Angpt4	489.365	Eapp	607.638	Cdc25c	93.7173			Snrk	57.2757	Mesdc2	20.9958	Zfp948	800.865
Smim8	55.8566	Trim32	51.0801	Errfi1	23.3826	Ttc8	340.913	Slitrk6	21.1303			Lifr	6.55666	Cyp2a4	488.696	Acadm	607.499	Plk1	93.5841			Ret	57.1121	Pinx1	20.4286	Zfp451	800.36
Gm10548	55.6232	1700007K13Rik	50.9521	Rps27	23.3807	Tbc1d15	340.631	Chst15	21.037			Junb	6.09428	Elf4	488.602	Zdhhc21	607.143	Cdc20	93.431			Hax1	57.063	Brk1	19.8975	Nrd1	800.094
Brd8	55.3613	Trnp1	50.3622	Rpl21	23.3533	Ube2f	340.33	Prom2	21.0197			Rpl23a	5.81316	Olfr118	487.36	Trappc8	606.831	Hist1h2an	93.3944			Rab17	56.4243	Mir205	19.756	Dhx15	799.845
Morn2	55.235	Zfp781	50.2959	Got2	23.3053	Dync1li2	339.895	Ppp2r2c	20.2415			Rps25	5.79918	Pglyrp1	486.802	Pls3	606.473	Cenph	93.3551			Nipal2	56.3809	NA	19.5918	Pcf11	799.64
Bag3	55.1712	Nfil3	50.0963	Ly6a	23.2548	Crot	339.253	Bmp4	20.154			Niacr1	5.74282	Olfr670	486.658	Gpalpp1	606.462	Ube2c	93.3511			Mllt3	55.8074	Mapkapk2	19.4817	U2surp	799.435
Cpt1c	54.6946	Apoo-ps	49.5063	Krt79	22.9803	Copb1	339.247	Gabrp	20.1101			Fos	5.6864	Neto1	486.644	Prepl	606.333	Kif14	93.0284			Zfp943	55.6674	Wdr18	19.3752	Parp8	796.802
Npas2	54.5256	Bloc1s1	48.6743	Gas5	22.8917	Rmi1	338.004	Aff3	20.1094			Clu	5.58611	Dbx2	486.51	Hnrnpul2	605.257	Rad51ap1	92.6353			Cmah	55.4925	Mrpl51	19.1513	Morc2a	795.09
Mpi	54.4943	Ralgps2	48.49	Gnas	22.7448	Psmd12	337.7	Rpl7	20.1054			Plbd1	5.56923	Car5a	486.481	Dpp8	605.227	Hist1h3d	92.6193			Frg1	55.2391	Churc1	19.14	Ube2v2	794.696
Fam53c	53.2521	Rtn4rl1	48.1602	Gm12191	22.7367	Nmd3	337.379	Rbbp6	19.9299			Clca2	5.50504	Chi3l3	483.399	Ndufs1	605.047	Melk	92.4399			Lrrc8c	55.0974	Dnph1	18.8263	Dph6	794.295
Lrrc8e	53.0239	Fn1	47.1505	Gdpd2	22.4665	Hibadh	336.799	Ikzf2	19.8631			Atf3	5.47199	Gm12191	482.149	Crk	604.313	Cenpe	92.3292			Gjb2	55.0561	Fdft1	18.8084	Zak	793.299
Snora23	52.9142	Higd2a	46.7108	Cttnbp2	22.1918	Phf10	336.57	Rapgef6	19.8373			Snora28	5.45538	Vmn1r117	481.903	Stx17	603.396	Ticrr	92.2234			Naa20	54.7478	Lgals7	18.1113	Guf1	793.282
Gm7367	52.715	Igfbp4	46.5127	Grhl3	22.1366	Mat2b	335.85	Sorbs2	19.67			Snora3	5.41345	Tctex1d4	481.438	Nudt9	603.327	Ccnf	92.0729			Sox4	54.1789	Prdx1	17.6187	Smap1	792.875
Med29	52.6315	Cyb5	46.3379	Trpm3	21.9108	Dcaf17	334.177	Slc6a4	19.5795			Clca1	5.39588	Sox15	480.839	Ncoa4	603.034	Hist1h2bb	92.0164			1110032A03Rik	53.9785	Gna11	17.1747	Hnrnpa2b1	792.17
Ranbp1	52.1143	Rfc2	45.6027	Agpat4	21.8685	Brms1l	333.872	Acot9	19.3331			Ppl	5.33478	Abhd15	479.815	Mfap1a	602.015	Hist2h3b	92.0107			Gja1	53.8221	Slc25a29	16.5806	Zfp719	792.09
Rnasek	51.8373	Ugt1a9	45.1064	Gm10136	21.6662	Chmp5	333.651	Tpmt	19.3033			Serpine1	5.30234	Bcmo1	479.329	Hook3	601.819	Arhgap19	91.8769			NA	53.7229	Kansl2	16.5171	Alcam	791.308
B9d1	51.8075	Tmsb10	44.7241	Rpl29	21.5206	BC017643	333.171	Dsg1a	19.2647			Il1r1	5.16877	Slc30a10	478.942	Ric8b	601.536	Ptch2	91.622			Nbea	53.6372	Arl2bp	16.4181	Fam76b	790.881
Creb5	51.4546	Krtap17-1	44.3733	Prss23	21.2904	Lin7c	332.579	Trim7	19.2			Irs2	5.0053	Syt2	477.914	Zbtb41	601.414	BC049688	90.9925			Tril	53.2522	Papd7	16.2906	Ppp1r12a	789.97
Klf10	51.3897	Adamts19	43.2312	Cyp17a1	20.8983	Taf9b	331.797	Ccr4	19.05			Figf	4.90531	Crygn	477.027	Enpp5	600.925	Aurka	90.6373			Mgp	52.8768	Mir200b	15.783	Npat	789.842
Gm2173	51.2557	Mrpl34	42.0003	Ahcy	20.7799	Phyh	331.413	Fbxo32	18.9852			Ccl19	4.88239	Ksr1	476.984	Btaf1	600.627	Dtl	90.1438			Ttc33	52.3538	Sh3bp2	15.7715	Dpm1	789.762
Cspp1	51.134	Rnaset2a	41.7557	Glul	20.7792	Abhd13	331.374	Slc24a3	18.8045			Lce1a1	4.804	Fut7	476.818	Trove2	599.94	Col27a1	90.0968			Tmtc2	52.2905	Aqp7	15.7522	Krit1	788.992
Ewsr1	50.8327	Nudt14	41.7194	Leprel1	20.6869	AA987161	330.368	Slc31a2	18.6745			Rbpms	4.4556	Ndufb5	476.374	Scyl2	599.87	Ccna2	89.9296			Uchl5	51.494	Slc39a13	15.6662	Znrf2	788.983
2610528A11Rik	50.6732	Rufy4	41.6894	Ifngr1	20.5809	Mterfd1	330.215	Elmod1	18.5463			Dlc1	4.35872	Stac2	475.757	Strn3	599.561	Ect2	89.8183			Mcam	49.8658	Rnd2	15.3984	Poc5	788.934
Rasgef1b	50.4941	Pfdn1	41.5597	Zfp750	20.5618	Cbx3	329.242	Abca12	18.088			Cyp2f2	3.88811	Olfr322	475.624	Prkar2a	599.409	Mcm3	89.6857			Znf41-ps	48.8547	Scd2	15.2217	Gm14430	788.917
C1qtnf1	50.1987	Gramd2	41.4522	AA986860	20.4978	Rras	328.793	Ipmk	18.0496			Egr1	3.84067	Nkapl	474.997	Kidins220	598.613	Sgol2	89.4189			Slc39a6	48.1314	Nutf2	15.0979	Rc3h2	788.067
Plekhn1	50.1134	A730017C20Rik	41.38	Slc12a6	20.305	Laptm4a	328.552	Serpinb7	17.9825			Snora44	3.80869	Olfr1331	474.415	Extl3	598.4	Kif20b	89.4164			Apool	46.9876	Nol9	14.9103	Dnajc19	787.336
Sepw1	50.0907	Ndufa3	41.1068	Gm94	20.2681	Cd63	328.269	NA	17.9654			Ier2	3.54827	Mir409	474.394	Vps4b	597.977	Ankle1	89.2475			Srp14	46.6356	Scara3	14.898	AW549877	786.314
Aoc2	49.3405	Aebp1	40.8211	Cdsn	20.0061	Tceal1	328.017	Clip4	17.6427			Epgn	3.12527	Gbx1	473.651	BC016423	597.933	BC030867	88.6848			Zfp759	46.5553	Cyb5r1	14.7366	Emb	785.705
Bnip1	49.2277	Dlx3	40.6056	Taf1d	19.7645	Polr2m	327.761	Zfp874b	17.6378			Ucp2	2.7189	Rgs20	473.429	Lmbrd1	597.812	Cit	88.4871			Zswim6	44.7106	Psme2	14.7346	Nvl	785.537
Ifnz	48.8979	Etfb	40.3268	Bbox1	19.3899	Atp6v1e1	327.607	Ikzf5	17.0971			Csf2rb2	1.93006	Gm5169	473.161	Vps13a	597.498	Arhgap8	88.0663			Thbs1	44.3844	Atp5g1	13.6857	Vps29	784.925
Porcn	48.361	Atox1	40.2493	Cnn2	19.29	Ugdh	325.712	Fndc9	16.7041					Cartpt	473.083	Grsf1	597.151	Cenpn	87.89			Ptpru	44.2149	Ppif	13.6567	Creb1	784.859
Myef2	47.5213	Tceb2	40.1667	Cdkn1a	19.1787	Hsd17b11	325.46	Psapl1	16.5859					Spatc1	472.38	Slc17a5	596.661	Ccnb2	87.8231			Scube2	43.4065	Cox5b	13.5349	Rtn3	784.309
Ctxn1	47.265	H2afz	40.0946	Rpl28	19.1232	Ppp1r2	325.408	Usp2	16.5338					Il7r	472.241	Cul2	596.449	Kifc5b	87.5541			Smoc1	43.1615	Ubiad1	13.3991	Nsmce2	781.931
Tubg1	46.8863	Ndufv3	39.5434	Klk7	18.985	Etaa1	324.244	Pou2f3	16.451					Cd83	471.605	Frs2	595.359	Ankle2	87.3532			Lhfpl1	43.1278	D930048N14Rik	13.3548	Tceb1	781.23
Npcd	46.5641	Sdc3	39.3859	5830428H23Rik	18.7515	Rab35	324.142	Rab27a	16.2243					Adap1	470.455	Eea1	594.767	Cenpa	86.9791			N4bp2l1	42.8337	Npbwr1	13.1906	Cul3	781.222
Gyltl1b	46.3943	Grip1	38.917	Kctd12	18.155	Trim25	324.057	Osgin2	15.8925					Mir93	470.023	Sbno1	593.806	Zwilch	85.8359			Adamts9	42.7328	Hmgcr	12.992	Phtf1	781.206
Smim20	46.3123	Syna	38.8093	Fam180a	17.9572	Utp11l	323.805	Herpud1	15.7416					Rnf113a1	469.769	Dennd5a	593.424	Birc5	85.5883			Sprr4	42.6179	Sc4mol	12.9054	Mob1b	780.871
Kcnc4	46.2748	Sulf2	38.7598	1700055N04Rik	17.6949	Ap3s1	323.573	Slc22a23	15.3775					Acoxl	469.159	Aasdhppt	593.283	Hist1h2br	85.5372			Nudt21	42.4869	Nynrin	12.2424	Dhx57	780.772
Tmem97	46.1814	Cers3	38.3222	Skint9	17.6356	Sucla2	323.571	Dhrs9	15.0981					Agtr2	469.034	Vps13c	592.998	Brca1	84.9232			Them5	42.4755	Rpl10	12.0779	Vps36	779.551
Mfap3l	46.1554	Slc39a14	38.3101	Rps8	17.4607	Rab12	323.453	Tbpl1	15.0515					Cidea	468.539	Ccdc127	592.898	Hist1h3g	84.7665			Tmsb4x	40.6312	Zdhhc18	11.9186	Dars	778.863
Ino80e	46.1376	Cspp1	37.8681	Rpl23a	17.404	Zfp637	323.066	Cyp3a13	14.8747					Gm8074	467.459	Chuk	592.238	Hist1h2ao	84.5466			Nrp1	39.6431	Slc35b1	11.4828	Twf1	777.58
Fxyd6	46.0224	Sarnp	36.96	Rpl15	17.3016	Zfp84	322.818	Gfra2	14.7675					Ccl8	465.653	Zfp644	590.972	Dna2	84.5337			Mansc1	39.2348	9430023L20Rik	10.9664	S100pbp	776.423
Cox20	45.9897	Znrd1	36.8154	Rps19	17.2033	Tank	321.991	Cyp2b10	14.4184					Itgb7	465.56	Setd3	590.396	Hist1h2bh	84.4049			Kalrn	38.8007	Dhcr24	10.8521	Fnbp1l	776.382
Krtap5-3	45.9121	Lsm3	36.1616	1810062O18Rik	16.9953	Slc30a6	321.385	Ptgfrn	14.1042					Uchl1	464.442	Exd2	588.643	E2f7	83.1085			Map4k4	38.6144	Mrps6	10.841	Srp72	774.925
2610524H06Rik	45.5408	BC034090	35.5384	Bcl2a1a	16.8372	Kpna3	321.31	Dennd4a	13.6555					Cdx1	464.151	Zcchc6	587.914	Pmf1	83.0992			Cdkn1b	38.5522	Insig1	10.2386	Bdp1	774.187
Ivns1abp	45.0959	Disp1	35.3044	Snord49b	16.7084	Jkamp	320.809	Grhl1	13.5963					1700065I17Rik	463.581	Mtmr6	587.456	Anln	83.0167			Slc25a20	38.2116	Cox18	10.2007	Ndufs4	772.088
Smim1	44.9217	Hmgcs2	34.4377	Rpl38	16.6691	Zmpste24	320.63	Krt1	13.152					Rtn4rl2	463.265	Snx27	587.389	Fam63b	82.7453			Mapk11	37.0744	Atp5l	10.1038	Zfp59	771.239
Hist2h4	44.9024	Rrm2	34.3459	Dsc1	16.6096	Hexb	320.541	Ptgs1	13.0068					Igk	462.364	Fem1c	586.261	Fancd2	82.7246			Muc15	37.071	Abcf2	10.059	Hnrnpu	771.178
B930078G14Rik	44.7642	Atp6v1f	34.2802	Rpl13	16.374	Dpp7	320.454	Pak3	12.7922					Pou2af1	460.997	Slmap	585.492	Nckap5l	81.9766			Eya2	36.7357	B930041F14Rik	10.0486	Usp8	771.171
Tcf7	44.6763	Grik5	33.8553	Rpl11	16.3469	Vbp1	319.996	Prickle2	12.2779					Foxd3	460.592	Eif5	585.385	Ttk	81.7152			Hspb1	36.3704	Rfc3	9.76795	Pdcl	771.115
Mir149	44.4687	Clip3	33.307	Casp14	16.3313	Pqlc3	319.801	Fam84a	11.9331					Vmn1r196	459.493	Pdpk1	585.227	Rad54l	81.3388			Fam49a	35.8048	Ptges2	9.55258	Tax1bp1	770.873
Hist1h4c	44.2753	Atp5h	32.9764	Foxo1	16.0288	Sbds	319.773	Ly6c2	11.8003					Rimkla	458.558	Tiam2	582.686	Ccnb1	81.2091			Adamts1	35.173	Rpl13	9.51572	Ext1	770.469
Armcx2	44.0403	C1s	32.8092	Pebp1	15.9997	Tmem106b	319.706	Cry2	11.7229					Rps27a	458.249	Fam179b	582.277	Cdk1	81.0489			Cpt1a	34.6685	Ndufaf4	9.49846	Zfc3h1	769.94
Krtap5-2	43.5056	Fabp3	32.6596	Kcnj16	15.7951	2210016F16Rik	319.698	Atp1b1	11.6664					Ssty2	457.781	Azi2	582.261	Ncaph	81.0444			Fads2	34.6431	Rgs10	9.49077	Morf4l1	769.074
Hk2	43.4135	Plag1	31.6939	Acer1	15.7656	Sdcbp	319.615	Rhobtb1	11.341					1700018A14Rik	457.668	Snap23	582.234	Klf14	80.7228			Rufy3	34.5047	Cd3e	9.42293	Atp11b	768.797
Reep4	43.3874	Adamts17	31.3996	Ly6g6c	15.6338	Atl2	319.51	Sgpp1	11.0017					Hoxd11	457.212	Snx7	582.085	Diap3	80.1772			Kcnh1	34.1197	Tfpt	9.39047	Zfand6	768.585
Dhfr	42.69	Ramp1	31.2765	Pfkfb3	15.5851	Nck1	319.479	Heca	10.9333					Ssx9	456.968	Cdk19	581.867	Kcng1	79.979			Hist2h2aa1	33.7314	Cxcl10	9.32693	Timm8b	768.425
Cenpt	42.5259	Ptpla	29.8729	NA	15.4383	Ppp1r2-ps3	318.826	Cst6	10.8891					Tmprss3	456.941	Cfl2	581.609	Arhgef39	79.4696			Luzp1	32.5497	Zfp503	9.14306	Dmtf1	767.97
Gm6034	42.4317	Gstm2	29.7079	Rs5-8s1	14.6683	Zmat2	318.649	Tmem140	10.583					Slc35f1	456.775	Ndfip1	581.496	4930422G04Rik	79.383			Rhob	32.2647	Mak16	9.13245	Eif1ax	767.826
Chrm1	42.3964	Manf	29.5061	Per1	14.6644	Cdc14a	318.616	4833423E24Rik	10.2561					Sh2d1b2	456.565	Fyttd1	581.26	Stil	78.9717			Ssh2	31.9223	Tpcn1	8.88936	AU019823	767.8
Wdr62	42.3884	Atp5l	29.4031	Orm1	14.5747	Arl14ep	318.409	Skint10	10.1737					Spef2	456.491	Zfp281	580.714	Prkag3	78.7464			Acox3	30.0933	Mrps18b	8.75152	Smad5	767.629
H1fx	42.2503	3010003L21Rik	29.3175	Aldh3b2	14.5166	Clint1	317.474	Tppp	10.0836					Ptger2	456.385	Capns2	580.212	Rad54b	78.6584			Olfml3	29.834	Gar1	8.32905	Wdr33	766.777
Snord55	42.1241	Ormdl2	29.0859	Tprg	14.4818	Cebpg	316.654	Krt10	10.0792					Gria1	456.28	Daam1	579.922	2810417H13Rik	78.6325			Dbn1	29.8182	Ccdc86	8.3177	Emc7	765.255
Gapdh	41.9363	Clic3	29.013	Rpl19	14.2199	Lrp12	316.494	Rplp0	10.0237					Zbtb7c	455.806	Rab6a	579.56	Cep55	78.1533			Nuak1	29.113	Dlx2	8.15172	Tcerg1	764.38
H19	41.7716	Tspan8	28.5593	Gm13034	14.188	Rab5a	316.234	Npl	9.91442					Grm2	455.07	Diablo	579.305	Hist2h2bb	77.9658			Cmc1	28.7978	Cd3g	8.1372	Mapk1ip1l	764.218
Haus5	41.593	Podn	27.6932	Klf11	13.9002	Pmpcb	316.187	Plk2	9.44053					Myl1	455.036	Pik3ca	579.109	Tbc1d9	77.6884			Lxn	27.9248	Ube2l3	8.03484	Gcc2	763.983
Rbmx	41.379	Penk	27.2671	Serpina3b	13.8747	Atp11c	316.154	Stk39	9.43344					Slc1a1	454.597	Blzf1	578.554	Zfp507	77.6158			Sdpr	27.7446	Pgp	7.89666	Tra2b	763.699
Hist1h2ab	41.3046	Rbm17	27.2623	Tsc22d3	13.8433	Arl5b	316.115	Ntn4	9.19916					Olfr1083-ps	453.099	Nus1	578.002	Dhrsx	77.5775			Fam103a1	27.3822	Etv5	7.58623	Ercc5	763.494
Chst2	40.8668	Best2	26.8561	Mt4	13.6813	Stag2	316.068	Pid1	9.10372					Foxd2	452.779	Myo6	576.674	Cad	77.451			Rnf180	26.2782	Shisa2	7.56301	Cnot6	762.536
Cntfr	40.8623	Slc7a2	26.6513	Klf9	13.5328	Phospho2	315.994	Gpam	9.02621					Bmp10	452.693	Uba6	576.568	Prosc	77.3441			Gab2	24.9886	Ndufab1	7.39068	Zfp26	762.489
Fxyd4	40.7519	Mmp14	26.5172	Ppia	13.4387	Cct8	315.76	Golph3l	8.75403					Itk	452.66	Rbbp9	576.084	Lrdd	77.3336			Tubb2b	24.9505	Trgv2	7.38142	9130011E15Rik	761.185
Rmnd5b	40.6492	Acot7	26.3423	Atp5l	13.2443	BC003331	315.143	Bace2	8.18946					Zfpm2	452.283	Rsbn1l	575.933	Hoxa4	77.2363			Tbc1d4	24.9319	Ppp5c	7.366	Ergic2	760.684
Pbdc1	40.5727	Ucn2	25.7351	Rpl7a	12.7734	Tet1	315.121	Ust	8.01014					Olfr707	452.042	Usp15	574.496	Ung	77.1561			Htra1	23.301	Slc12a9	7.1235	Uhrf2	760.046
Cdc42ep5	40.3321	Sbspon	25.5574	Crct1	12.7616	Rheb	315.097	Otud1	8.00142					Cdkn2a	451.678	Tsn	574.331	Gm10584	76.5962			Eif4e3	21.9976	Polr2l	7.08224	Rbm27	759.745
Rpl29	40.2119	Dlk1	25.4736	Sppl3	12.701	Nufip1	314.311	Klf4	7.14964					Mpped1	451.152	Zranb1	573.899	Galnt11	76.2746			Clec2d	21.6413	Ttyh2	7.00913	2002-09-01	759.713
Hist4h4	39.9895	4930467E23Rik	25.3886	Slc43a1	12.688	Esd	313.876	Acsl1	6.92825					Ifna7	450.612	Kdsr	573.781	B4galnt1	76.1772			Mir703	21.1857	Chd4	6.99898	Brd7	759.554
Nynrin	39.9396	Col4a2	24.5277	Rps25	12.5871	Pole4	313.828	Rnf144b	6.69289					Fndc7	450.568	Gtdc1	573.004	Lmtk3	75.8278			Prkar2b	20.9051	Nfatc1	6.9405	Srpk2	758.762
Gadd45g	39.9033	Frem2	24.4069	Lipm	12.5564	Upf2	313.108	Rpl13	6.50118					Slc7a14	449.062	Far1	572.711	Mir328	75.4577			Hmox1	20.2834	Tmem238	6.86398	Gstz1	758.733
Hist1h2ao	39.8646	AI464131	24.3903	1810011O10Rik	12.2364	Atp6v1c1	313.051	Calm5	6.27215					Foxl1	448.978	B630005N14Rik	572.53	Bard1	74.669			Rdh12	19.6943	Rpl37a	6.83903	Hoxc6	758.622
Atp6v1g2	39.6098	1110008P14Rik	24.0867	Ghr	12.0552	Mob4	313.038	Epas1	6.27068					Gsc	448.329	Acvr2a	572.393	1700008J07Rik	74.6066			Plcl1	18.6544	Grb14	6.79897	Gm10012	758.435
Nkain1	39.4057	Pcp4	23.9571	Elovl4	12.026	Ppp6c	313.019	Spink5	6.16258					E230008N13Rik	447.79	Crbn	572.305	Mir181d	74.4233			Plekhf1	18.4672	Ppargc1b	6.63111	Tpp2	757.279
Eif3c	39.1751	Basp1	23.4266	Szt2	11.8079	Med17	312.605	Mup1	6.04062					Heyl	447.083	Parn	571.478	Espl1	74.406			Sptlc3	18.3519	Emp3	6.61167	Ankmy2	757.248
Ppp1r12b	38.8786	Mrps21	23.3833	Cyp2b19	11.711	Auh	312.076	Rps25	5.40995					Ankrd33b	446.658	Pitpnb	571.439	5730522E02Rik	73.148			Adamts2	18.2846	Alas1	6.52082	Surf2	757.129
Banf1	38.8181	Ctnnd2	23.2761	Rpl36	11.5628	Psmc6	311.864	Mup2	5.32907					Btnl2	446.604	Rsg1	571.163	Chtf18	73.0871			Pinlyp	17.921	Ndufa6	6.13712	Naa50	756.274
Wdfy3	38.6027	Ldoc1l	22.5873	Rps18	11.4446	Elovl5	311.478	Klf6	4.82273					Itgb2l	446.595	Gabarapl1	571.065	Szt2	72.8931			Mrps18c	17.7745	Nrm	5.96923	A530054K11Rik	755.495
Ndufs8	38.5081	Snord15a	22.4691	Rab25	11.403	Dnajc8	311.271	Rps3a1	4.21747					Ucn	446.237	Fam45a	570.28	Kifc5c-ps	72.8558			Mknk2	17.1458	Psenen	5.93101	Btf3l4	755.433
Oip5	38.2863	Mgst2	22.1923	Hint2	11.3483	Ccnh	311.07	Rps4x	3.90905					Utf1	445.204	Ndrg3	569.927	Rragc	72.8246			Sash1	16.9953	Nxt1	5.77616	Zfp617	754.722
Amer2	38.1555	Nedd8	21.9551	Rny3	11.2753	Dnajb9	310.983	Gjb6	3.45839					Fthl17	444.94	Plxdc2	569.751	Nkx2-5	72.7021			Sprr1a	15.8674	Bysl	5.69692	Ophn1	754.172
Snord57	37.6819	Col4a1	21.6116	Ppp1r15a	11.1792	Pdlim3	310.851	Selp	3.34938					Rasl10b	444.529	Ccng1	569.56	Clspn	72.4936			Ccdc71l	15.8628	Tsen34	5.54963	Bnip3l	754.042
Adamts17	37.6456	Snord15b	21.0381	Hrnr	11.1413	Dock11	310.832	Rpl36	2.74479					Gm5105	444.454	Twf1	569.306	Dsn1	72.412			Xrcc4	15.8465	Mir200a	5.47009	Nktr	753.516
Pnkd	37.3064	Spon2	20.9581	Slc10a6	11.0151	Rfk	310.484	Adrb2	2.73919					Fmnl1	443.828	Fbxo3	569.099	Stmn1	72.2442			Fads3	15.7376	Icam1	5.46584	Bcap31	753.404
Cd276	37.2778	Gpc2	20.5213	Gjb2	10.7827	Zfp429	310.334	Mmp2	2.70652					Olfr307	443.375	Pkn2	568.676	Hsd11b2	72.0394			Mustn1	15.0186	Opa3	4.93664	Mtf2	753.254
Zfp784	37.2458	Lcn2	20.3762	Art3	10.5949	Aig1	309.811	Cyr61	1.95364					Tmie	442.786	Zfp280c	568.479	Fam64a	71.9455			Calm4	14.6357	Sema4a	4.80205	Zcrb1	753.184
Pmepa1	36.9449	Snrpc	20.3062	Dcn	9.6588	Mgat2	309.65							Cyp2c68	441.895	Asah1	568.472	Mcm5	71.7652			Map2	14.5914	Cish	4.75075	Zmynd11	752.271
Myl6	36.5754	Ltbp2	20.1136	Snora21	9.59273	Dlg1	309.553							Exoc3l4	441.603	Eps15	568.33	Slc7a5	71.6463			Mtss1l	14.5866	Dcxr	4.36507	Rabgap1	752.264
Mir320	36.5133	Ppp1r14a	20.0443	8430419L09Rik	9.55115	Ikzf5	309.536							Itga7	440.204	Zfp654	566.762	Ccne1	71.4984			Cux1	14.5591	Ldhb	4.26572	Khdrbs1	752.152
Mir185	36.3855	Prr13	19.8188	Chl1	9.32413	2410127L17Rik	309.414							Htr1f	440.051	Syap1	566.146	Fanci	71.207			Rplp1	13.604	Gtpbp10	4.20679	Specc1l	751.892
Hist2h2aa1	36.3372	NA	19.5982	Rps2	8.73328	P2rx4	308.389							Klhdc9	439.835	Pfkp	565.854	Fam177a	71.0316			Adh1	12.9108	Ifitm3	4.00428	Hdgfrp3	751.353
Tspan18	36.3019	4930412O13Rik	19.4516	Kprp	8.00919	Papss1	308.193							Nkx6-1	439.064	D14Abb1e	565.661	Pla2g3	70.9621			Dkkl1	12.8234	Npm3	3.85776	Tom1l1	751.194
Sars2	36.2604	Robo1	19.3571	Pabpc4	7.02021	Snx14	308.169							Ptpn18	438.517	Slc25a24	565.226	Kpna2	70.4126			Nrarp	12.7771	D17H6S53E	3.72277	Ptcd3	750.969
Cstb	35.9629	Srgap1	19.2604	Hpgds	6.71183	Alg14	307.604							Il22	438.515	Lims1	565.097	Gm4532	70.2946			Ypel3	12.7736	Mirlet7c-2	3.71159	Depdc5	750.307
Mir346	35.8643	Gm5617	18.9762	Rpl27a	5.46032	A630007B06Rik	307.428							Eed	438.052	Ctdspl2	564.914	Hmgn2	70.2927			Bud31	12.7527	Pdgfb	3.69752	Meaf6	749.698
Igf2bp3	35.7932	Palm2	18.8299	Hist1h4b	4.8883	Dram1	307.315							Tbx21	437.441	Zdhhc20	564.224	Timeless	70.1581			Srgn	12.7086	Gm6194	3.689	Caprin1	749.669
Rnu1b1	35.7394	Il11ra1	18.002	Wee1	4.31396	Xdh	307.135							Ssu2	437.121	Scrn3	563.291	5730408K05Rik	70.1515			Ivl	12.6615	Snord16a	3.51239	Spred1	749.667
Rnf26	35.5809	Ctsc	17.9104	Ly6g6e	3.86483	Rbm7	307.087							Sstr1	437.02	Mfn1	563.174	Pno1	70.0355			Arrdc3	12.6602	Adora2a	3.47527	Tmx3	749.578
Hist1h4f	35.3316	Fam96b	17.8627	Pdpn	2.25482	Stx7	306.955							Myo18b	436.784	Slc30a4	562.895	Lrrc56	69.9998			Car12	12.5601	Mfsd2a	3.31518	Synj2bp	749.4
1810037I17Rik	35.162	Ndufa2	17.7382			Asb3	306.847							F930015N05Rik	436.115	Sec23a	562.486	Gli1	69.9785			Rpl11	12.1395	Rassf7	3.16011	Pdcd10	749.307
Mov10	35.0864	Prodh	17.6349			Ube2h	306.612							Slc25a46	436.048	Xrn1	562.123	Spc25	69.8934			Tmprss13	11.7762	Rasgrp4	3.15645	Gpx8	749.28
Mapk1ip1	34.9493	Rnase1	17.3951			Txndc12	306.331							Cilp2	435.459	Capns1	561.999	Pld2	69.6292			Bpifc	11.5471	Rgs3	2.77599	Ncl	748.524
Romo1	34.7291	Col1a1	17.3532			Ssx2ip	305.973							Trim63	435.434	Pcmtd2	561.878	Ptch1	69.4948			Pglyrp4	11.5103	Ube2i	2.25425	Smarca5	748.521
Mir341	34.7245	Rpl11	17.2489			Eid1	305.857							Pmch	435.213	Nab1	561.636	Ndc80	69.2435			Rpl10	11.3862	Slc16a9	2.13197	Gm6710	748.284
Trio	34.4802	Ftl1	17.1151			Sh3bgrl	305.691							Nlrc3	432.831	Dpy19l4	561.474	Kif4	69.2388			Slc4a4	11.271	2310039H08Rik	1.94698	Pdcd5	748.255
Pdk4	34.3605	Ubl5	16.9183			Bicd2	305.475							Trim10	432.706	Scaper	560.793	Slfn9	69.1914			Rps29	11.1784	Bpgm	1.61094	Ube2j1	747.468
Gse1	34.3466	Pgls	16.676			Brix1	305.443							Mir203	432.515	Rock1	560.371	Mxd3	68.7836			Tgm3	10.8049	Hoxa2	1.58581	Galnt11	746.296
Hist1h4b	34.1863	Snhg1	16.4675			Bag1	305.21							Col6a5	431.366	Apc	560.052	Fanca	68.6502			Gatsl2	10.7688	Btnl5	1.55122	1110037F02Rik	746.015
Hist1h4d	34.0571	Rps29	16.1811			Atg3	305.08							Dnajb8	430.727	Ppp3r1	559.959	Bsn	68.2596			Rhou	10.6022	Srp54b	1.43907	Cav2	745.91
Rnu2-10	33.4387	Stxbp6	15.9786			Uba3	304.956							Gpr162	430.312	Trmt2b	559.931	Tgfb3	68.218			Rny1	10.38	Duxbl1	1.27921	Glo1	745.907
Wbp1l	33.3404	Serpinf1	15.9397			Chm	304.943							Atp7b	429.601	Crlf3	559.378	Tnfaip8l2	68.1009			Nlrp1c-ps	10.3103			Ddx3x	745.79
Trmt112	33.3001	Ctdnep1	15.8171			D17Wsu92e	304.919							Galnt9	429.015	Pja2	559.351	Arhgap11a	67.9773			Foxn1	10.2538			Sema3e	745.238
Gnb1l	33.1036	Uqcr10	15.7054			Dcaf5	304.225							Galnt6	428.879	Mapk9	559.256	Rad51	67.8358			Cox7a2l	10.0935			Pgam5	744.904
Hmgb2	33.0446	Suv420h2	15.5993			Stk3	304.174							Clec3a	428.579	Rasa2	558.743	Nuf2	67.6333			Carhsp1	10.0206			Ddx10	744.806
Adora1	32.9458	Chchd10	15.4923			Ahcyl2	303.94							Hhipl1	428.347	Yipf5	558.11	E2f2	67.4473			Ptk2b	9.82724			Ireb2	744.604
Hist1h2af	32.7447	Gm4924	15.4075			Sacm1l	303.558							3110082J24Rik	428.339	Tpm1	557.534	Gm2837	67.3276			Cox7c	9.76116			Ywhah	743.675
1810019J16Rik	32.7203	Snord34	15.3432			Gabarapl2	303.433							Lrrc38	427.825	Zfp426	557.427	Lmnb1	67.311			Rps27a	9.56094			Gm10033	743.534
Heatr5b	32.5133	Pde9a	15.1906			Ccnc	303.093							Tal1	427.381	Ap4m1	557.159	Tbx18	67.0954			Itih5	9.50426			Sri	743.165
Atp2a3	32.4136	Ap2s1	15.0981			Atxn7l3b	302.974							Olfr303	426.896	Nicn1	557.07	Spata24	66.9678			Rhov	9.49658			Hnrnph1	742.988
Tmem14c	32.3825	Srcin1	14.7431			Tmem254a	302.724							Fam166a	426.847	Papolg	556.18	Slco4a1	66.8402			Arhgef12	9.45448			Tada2a	742.966
Tomm6	32.279	Krt33b	14.7062			Glod4	302.01							Calcoco2	426.712	Ubxn7	556.061	Dnmt1	66.7107			Hal	9.42244			Srsf11	742.915
Ndufa7	32.0559	Mark2	14.6475			Trappc6b	300.721							1110017D15Rik	425.236	Pigk	555.818	Nucks1	66.223			Pvrl4	9.36682			Pphln1	742.774
Rnu73b	31.9859	Lamtor1	14.5944			Elf2	299.816							Wnt3a	424.983	Map3k2	555.803	Knstrn	66.076			Ntrk2	9.27594			Lcor	742.331
Paqr6	31.9285	Hcfc1r1	14.343			Slc35f5	297.65							Olfr417	424.856	Cdc73	555.621	Heatr3	65.8352			Nfe2l3	8.92696			Mycbp	742.209
Vmn2r43	31.5048	Slc36a1	14.1149			Cfdp1	297.547							Sall1	424.178	Echs1	554.77	Wdhd1	65.6599			Klc3	8.86988			Itch	741.862
Tubg2	31.2642	Snord35b	14.0612			Sgcb	297.414							Tmem132e	423.47	Sod2	554.484	Nnt	65.4884			Me1	8.71249			Sec22b	741.596
Endou	31.1905	Snord32a	13.8763			Gskip	297.11							Dmrta1	422.711	Slc25a46	553.909	Gm20871	65.1092			Ephx3	7.84283			Rbm8a	740.402
Angptl4	30.9861	Ubald2	13.7324			Acaa2	296.982							Gpsm1	422.44	Krr1	553.624	Hist1h2ba	64.8304			Them4	7.8246			Exosc1	740.003
Rnf44	30.9321	Pmel	13.6287			Yaf2	296.697							Fga	422.391	Vps41	553.21	Depdc1a	64.4983			Krt73	7.50763			Cdadc1	739.985
Mbd6	30.7513	2810408A11Rik	13.4072			Ormdl1	296.442							4921517D22Rik	421.825	Dkc1	552.725	Syngap1	64.1253			Lor	7.45003			Snx5	739.839
Efna2	30.6083	Auts2	13.4069			Magt1	296.033							4930512B01Rik	421.704	Usp45	552.63	Ifna5	64.0843			Sdr16c5	7.44956			Ccar1	739.562
Kif7	30.3878	Parm1	13.0931			Tirap	295.796							Cyp2a5	420.433	Metap1	552.523	Hnrnpa3	64.0249			Scnn1a	7.07521			Strbp	739.133
Fam111a	30.3663	Nhs	13.0446			Psmd10	295.639							Tcp11	419.929	Bzw1	552.127	Rps4y2	63.9045			Tbc1d2	6.68474			Son	738.415
Sec61g	30.2152	Armc5	12.9841			Nmt2	295.331							Alyref2	418.925	Smc6	551.992	Dock6	63.2369			Lypd5	6.54775			Naa38	738.153
Ubald1	30.033	Snord33	12.9841			Eed	295.154							Lhx5	418.759	Acbd3	551.898	Prr5	63.0903			Stk17b	5.92258			Mrpl35	737.741
Sts	30.0293	Hey1	12.9499			Stat1	293.991							Plcxd2	418.205	Ahctf1	551.879	Ager	62.8955			Rpl9	5.66944			E2f5	737.617
Dcakd	29.8899	Rnu1b1	12.8006			Smndc1	293.863							Letm2	417.961	Pafah1b2	551.749	Tubb6	62.553			Bri3	5.65288			Pdcl3	737.345
Snrpd2	29.8701	Cd1d1	12.7538			Crnkl1	293.841							Golph3	417.66	Katna1	550.836	Mir210	62.2363			Klk5	5.60025			Anp32b	736.955
Hmga1	29.8545	Rims1	12.5009			Ube2g2	293.349							Fbln7	416.58	Dnajc3	550.684	Smc2	62.1891			Rnu3a	5.48615			Sdhaf2	736.82
2210404O07Rik	29.8392	Snord68	12.4267			Tstd2	292.505							Syt12	416.47	Pcnp	550.623	Dscaml1	62.0462			Tcp11l2	5.39257			Mettl6	736.781
Mir139	29.4674	Gpm6b	12.3503			Nln	292.271							Dnah7b	416.447	Rab21	550.414	Mybl2	62.0358			Sp140	5.0743			Adnp	736.352
Pom121	29.4306	Rtn4r	12.326			Mrrf	291.483							Pon1	416.424	Arpc1b	549.983	Crtc1	61.9228			Satb1	4.45285			Smarcad1	736.348
Otop3	29.4248	Taf10	11.9895			Rab18	291.267							Irs3	415.614	Myo1e	549.931	Hn1l	61.8821			Ache	3.81146			Orc4	735.9
Hist1h2bg	29.2068	Nudt1	11.848			Mlec	291.255							Magi2	415.105	Nek1	549.307	Gpsm3	61.7406			Fam46b	3.76831			Mettl3	735.789
Fam120c	29.089	Kremen2	11.697			Cops2	290.582							Hspa1l	414.805	Ubr3	549.257	Brca2	61.2108			Csrnp1	2.43578			Pik3c2a	735.273
Chd3	28.8049	Rnf223	11.304			Bmi1	290.269							Olfr1208	414.666	Scml2	548.755	3110040M04Rik	60.5889			Snf8	1.73805			Tbp	735.162
Hist1h2be	28.7501	Acsbg1	11.2844			Tbc1d5	289.975							A630038E17Rik	414.331	Rps6ka3	548.271	Myo18b	60.4999			Gm12669	1.57389			Cdc27	734.835
Ncor2	28.7443	Prss12	11.257			Rnf130	289.353							Hand1	413.674	Anxa5	548.152	Tyms	60.1843			Ppp1r2	1.46862			Rft1	734.756
Wnk2	28.7112	Zfp395	10.3228			Atg14	288.882							Rbm24	413.544	Taok1	548.067	Lap3	60.0086			Id1	1.43241			Smarce1	734.068
Hn1	28.6164	Med28	10.3086			Ctdspl2	288.741							Rgs14	413.296	Snapin	547.899	Hist2h2ab	59.867							Mpc1	734.052
Atf5	28.4169	Kcnip3	10.1999			Uty	288.59							Zglp1	413.035	Mbnl1	547.481	Ckb	59.7166							Mrps10	732.982
Snora52	28.3021	Gfra3	9.94733			Fam46c	288.344							Kcnmb4	412.601	Rnft1	547.312	Sec62	59.6757							Ufd1l	732.596
Wbp2	28.2974	Ggn	9.89355			Tmem183a	287.601							Vsig2	412.438	Cast	547.088	Pkmyt1	59.6402							0610009D07Rik	732.359
Rpl27a	28.0769	Mrpl23	9.56175			Adat2	287.295							Arhgap30	412.172	Gbe1	546.946	Fbxo5	59.6295							Cpne1	732.208
Dpep1	27.9369	Eif4ebp1	9.53268			Fbxo25	287.277							Olfr33	411.774	Suclg2	546.014	Sox3	59.5349							Cops5	731.847
Lsm7	27.8686	H2-Eb1	9.42311			Zfp58	287.165							Defb9	411.771	Hcfc2	545.965	Ncapg2	59.4899							Eral1	731.248
Olfr767	27.7037	Scand1	9.19319			Sh3pxd2a	287.16							BC043934	411.449	Pgm1	545.851	Gmpr	59.4475							Braf	730.533
Rpa3	27.5288	Ttyh3	9.01505			Vps26a	287.081							Kcnk16	411.32	Prr14l	545.828	Igsf3	59.3577							Ppib	729.788
Mdk	27.3937	Col8a2	8.69635			Arid4b	286.916							Hic1	410.315	Rbbp7	545.719	Mrto4	59.2377							Psma3	729.136
Cetn4	27.314	Mamld1	8.5545			Ppil4	286.83							P2rx5	410.253	Zfp146	545.557	Cntrob	59.0252							Erich1	728.876
Tnfrsf21	27.3045	Hist3h2a	8.451			Pias2	286.667							Ankrd34a	410.241	Zbtb33	545.399	9430015G10Rik	58.8128							Ssb	728.73
Bora	27.2907	Srsf3	8.44457			Pole2	286.145							Thsd7a	410.216	Suz12	544.662	Atp6v1b1	58.7813							Rpf1	726.846
Maz	27.2626	Soat1	8.34613			Camk4	286.022							Nova2	409.88	Ppp1r7	544.407	Gm9374	58.773							Meis1	726.596
Snord118	27.1873	Gm9908	8.30952			Cmtm6	285.593							Ikzf1	409.667	Mtmr1	544.237	Rad18	58.6097							Glt8d1	726.546
Hpvc-ps	27.0537	Msl1	7.82421			Ppp2r5c	285.502							Fcrl5	408.725	Rictor	543.841	Exo1	58.144							Txndc9	726.135
Fbrs	27.0426	Sf3b5	7.4013			Chac2	285.026							NA	408.023	Ube3a	543.794	Plk4	58.0951							Rpl34	725.255
Hist1h4h	27.0356	Snord104	7.26586			Oser1	284.874							Klk1b3	407.531	Noc3l	543.366	Rpl10	58.0257							Zmym4	724.273
Atoh8	26.9732	Rps6	6.96318			Hip1	284.871							Dact3	407.482	Dcaf12	543.268	Wisp2	58.0147							Enah	724.008
Hist1h4n	26.9691	Cd74	6.74154			Smpdl3a	284.685							Mir374	405.522	Fchsd2	542.51	Scnn1b	57.8983							Srek1ip1	723.839
Rbl1	26.7893	Cnfn	6.67843			Usp16	284.312							Ephb2	405.32	Qser1	542.382	Gli2	57.4912							Mto1	723.491
4833418N17Rik	26.5218	Ms4a10	6.51992			Ube2v2	283.158							Gm6455	405.096	Mid2	542.332	Rpl17	57.3367							Senp7	723.221
Gpr27	26.4558	Vgll3	6.2902			BC030336	283.112							Gm5662	404.645	Slc30a5	542.164	Nlrc5	56.9091							Yme1l1	722.295
Inppl1	26.4076	Eln	6.07574			Ptpn2	283.09							Pdyn	404.498	Fst	542.095	Qk	56.7682							Taok1	722.259
Hmgb1	26.3743	Tdg	5.61256			Jhdm1d	283.021							Elfn2	403.71	Met	541.667	C2cd4a	56.7357							Cetn3	722.184
Dpf1	26.2642	2700081O15Rik	5.61096			4930453N24Rik	282.964							Sp6	403.368	Rab1	541.224	Sacs	56.5867							Mki67ip	721.956
Oxt	26.1348	Uba52	5.2983			Cdkl2	282.308							Dppa2	403.077	Ranbp2	540.663	Cenpk	56.5491							Sumo2	721.866
Prr23a	26.026	Lurap1l	3.82075			Mpzl1	282.229							Grifin	402.271	Pdha1	539.627	Mad2l1	56.5167							Zfp260	720.762
Btg3	25.8819	Tmprss4	3.64802			Gmfb	281.75							9130011E15Rik	401.034	Hif1a	539.451	Lsm7	56.4115							Tomm7	720.671
Panx2	25.6885	Hs6st1	2.59897			Rab7	281.68							Gadd45a	400.951	Micu3	539.267	4930579G24Rik	56.3419							Kmt2d	720.25
Mir615	25.6378	Cyp2g1	2.26751			Cycs	281.372							Rps12	400.69	Insr	539.073	Cks2	55.9705							Tbce	720.203
Fbxw8	25.5459	Hmgb1	1.80144			Eif2s3y	281.245							Loxhd1	400.685	D15Ertd621e	538.971	Blm	55.9091							Timm8a1	719.866
Pcdh20	25.3962					H2-Ke2	281.04							Pik3cd	398.799	Ino80c	538.712	Krtap5-1	55.5829							Kdm5a	719.756
Hmg20b	25.3371					Itm2a	280.686							Col5a3	398.629	Cdk8	538.675	Ifnl2	55.507							Abi1	719.385
Snord35a	25.1049					Sra1	280.434							Apol6	398.577	Rabgap1l	538.398	Rnu1b1	55.3217							Fam69a	719.215
NA	24.4171					Bccip	279.807							Spink13	398.125	Zfyve9	538.199	Il22	55.1811							Ccdc50	719.129
Gpx2	23.9514					1110004F10Rik	278.965							Mrgprx1	397.413	Mpp7	538.195	E2f1	54.9739							Pnrc2	719.043
Atp5g2	23.8544					Pir	278.507							Ntn3	397.4	Oma1	537.885	Ptbp1	54.3732							Zmym6	718.545
Psrc1	23.66					Sde2	278.472							Igf2bp1	397.316	Osbpl2	537.675	Kif24	54.3334							Acat1	718.316
Ly6d	23.6031					Fnta	277.537							Palm3	396.956	Mme	537.33	Cox6b2	54.2712							Emc2	717.952
Cmc2	23.6008					Blmh	277.402							Rbm6	396.765	Ankrd13c	537.186	Mir667	53.9681							Copb2	717.731
Lsmd1	23.5373					Pnp2	277.27							Trpc4	396.192	Pde7a	536.74	Pcif1	53.8649							Terf2	717.631
Mir23b	23.2897					Rnf139	276.967							Gal3st2	395.406	Fam178a	536.335	4632427E13Rik	53.746							Tmem50a	717.38
Bard1	23.0315					Bcl2	276.924							Agmat	394.038	Rchy1	536.329	Hmga2	53.7179							Cox16	717.378
Arhgap33	22.9491					Vipas39	276.707							Ppp1r15b	392.744	Ggact	536.225	Wrnip1	53.5775							Ubp1	716.704
Mir181c	22.7245					Trappc2	276.366							Rps25	392.256	Drg1	536.122	Tnfsf11	53.5125							Cnot4	716.421
Gas5	22.6856					Ccndbp1	276.307							Vmn1r49	390.545	Fam96a	536.102	Fus	53.1905							Capn2	716.09
Rara	22.6487					Tvp23b	275.524							Ppm1j	390.432	Large	535.988	Haus4	53.0507							Strada	715.34
Ndufb8	22.6219					Ift57	275.168							Syt4	390.011	Rspry1	535.935	Ttll4	52.8263							Ppid	714.92
Snord14d	22.5085					Dek	274.108							Snap91	389.631	Rab11fip2	535.885	Ybx2	52.7445							Clpp	714.891
Plekhg2	22.4275					Ublcp1	274.001							Gm10638	388.164	Ufl1	534.655	Mcm2	52.7001							Stk4	714.835
Galns	22.2107					Haus2	273.846							Mmp3	387.214	Ccdc90b	534.339	Fen1	52.6238							Pot1b	714.317
Rbp2	22.1133					Elmod2	273.527							Col2a1	387.114	Pafah1b1	533.12	Amz1	52.5431							Tab3	713.729
Krtap2-4	22.0767					Mal2	272.635							Gcnt4	386.831	Myo9a	532.914	Crispld1	52.2464							Mgea5	713.633
Fbxo36	21.9751					Phf14	272.269							Tlx2	386.603	Cstf3	532.794	Mir150	52.0993							Psme3	713.489
Mcph1	21.9487					Yae1d1	271.487							Hmha1	385.831	Rap1a	532.703	Tubb5	52.0123							Smarca2	713.42
Szt2	21.9238					Agpat2	271.174							Mybpc2	385.697	Sos1	532.601	Cd200	51.9151							Raver2	713.367
Aaas	21.8335					2310030G06Rik	271.006							Relt	385.59	Fam83b	532.512	Slc38a4	51.6248							Poglut1	713.362
Tns1	21.5825					Ttl	270.216							Ncf2	385.519	Dtd1	532.304	Rrm1	51.4023							Glrx2	713.345
4930427A07Rik	21.4325					Mphosph10	269.565							H2-M10.4	385.43	Lmbrd2	532.055	Inpp5j	51.3148							Nfu1	713.183
Eif4ebp2	21.3479					Ppp2r2a	269.403							Usp17lc	385.38	Map4k3	531.716	Chaf1a	51.3016							Taf2	712.583
Atp5g1	21.2931					Smyd3	269.205							Leo1	385.182	Trpm7	531.697	Itgb6	51.2591							March7	712.384
Nfatc4	21.2502					Plaa	268.958							Des	384.578	Tmod3	531.623	Gins2	50.9732							Fert2	712.22
Lsm2	21.1759					Rsph3a	268.637							Hrk	383.932	Dcun1d5	531.569	Csf2ra	50.898							Mut	712.15
Rhno1	21.1166					Mospd1	268.498							Gm10375	383.664	Slc35e2	531.505	Pask	50.6596							Cnot7	711.821
Ccdc106	20.9702					Ptprg	268.252							Olfr444	382.579	Rad50	531.397	Ephb1	50.6253							Zfp386	711.811
Pfas	20.6939					Hsdl2	267.309							Insl6	382.445	Vma21	529.936	Tcf19	50.5628							Bptf	711.693
Ndufa11	20.6602					Slc39a10	267.096							Myoz3	381.701	Ddx46	529.696	Pxmp2	50.3049							Ap3b1	711.322
Zfp598	20.3526					Tm2d2	266.987							Them6	380.714	Rnf170	529.345	Pold1	49.6351							Zfp143	710.966
Fblim1	20.2619					Bnc1	266.478							Ush1g	380.707	Aida	529.116	Nrxn2	49.6197							Ik	709.571
Grik4	20.2039					Ncbp2	266.388							Fgf17	380.479	Cab39	529.037	Mir92b	49.2626							Dcp1a	709.244
Il17b	19.9821					Ctns	266.277							Slc22a30	380.463	Zc2hc1a	528.996	Crip1	49.2472							Sptlc2	708.565
Ppp1r18	19.9288					Smad2	265.919							Pls1	380.266	Clcn3	528.93	Vwa2	49.1436							Pkd2	708.247
Emilin3	19.0886					H1f0	265.892							Xylb	379.813	Fam177a	528.807	Col5a1	49.0766							Cops6	708.169
Ube2s	18.8988					Rragc	265.454							Gm12070	379.729	Coa5	528.711	Stra6	48.9957							Rbm26	707.719
Gm5299	18.799					Palld	265.431							Foxb2	379.717	Sat1	528.61	Tgif2	48.9423							Hnrnpd	707.526
Ccdc101	18.7948					Btbd10	264.882							Tmprss9	379.177	Arl6ip5	528.251	Adamts8	48.6686							Ube2d3	706.864
Tox	18.7055					Tmem62	263.762							Colq	379.173	Katnbl1	527.849	Zscan25	48.6411							Hnrnph2	706.526
Mms22l	18.6447					Sprtn	263.436							Ooep	378.009	Tmem161b	527.656	Mt3	47.9788							Aplp2	706.34
Megf6	18.6003					Sptssa	262.806							Rbmxl2	377.466	Snx2	526.723	Mthfd2	47.8629							Akap8	706.278
Ppp1cc	18.1844					Ei24	262.552							9830107B12Rik	376.735	Polr3f	526.615	Mctp1	47.8275							Zfp626	705.206
Lipe	17.9359					Sh3yl1	261.885							Tcf15	376.46	Atad2b	526.204	Acsf2	47.5538							Snap29	705.059
0610010K14Rik	17.7162					Cspp1	261.435							Etv1	376.286	Ctsl	526.186	Pola2	47.4242							Dnajc7	704.659
Adcy7	17.7162					Zcchc9	260.952							Colec11	375.659	Pter	525.159	Cdc6	47.366							Cd47	704.541
C330027C09Rik	17.6401					Nt5dc1	260.354							Ncl	375.513	Stard5	524.869	Trip13	47.2215							Pcm1	704.185
2011-09-01	17.6177					Pkd2l2	260.322							Lao1	374.155	Uprt	524.737	Clhc1	47.0842							B3gnt2	703.376
Numbl	17.2145					Nit2	260.297							Tcrg-V4	373.919	Rsu1	524.704	Dynlt1c	46.9426							Zfp740	703.146
Selm	17.1399					Zfp322a	260.005							Bend4	372.915	Zfp595	524.128	Mcm4	46.8944							Clic1	702.664
Gjb3	16.7164					Tll1	259.933							Ahctf1	372.777	Cdkal1	524.062	Scoc	46.2371							Pdzd8	702.541
Klk6	16.7118					Glcci1	259.777							Amn	369.724	Gtf2h1	523.92	Tle3	46.0868							Fermt2	702.495
Hist1h4m	16.5229					Fkbp9	259.284							Ifna13	369.64	Ccz1	523.913	Slc16a3	46.0475							Canx	701.969
Kctd17	16.3643					4833439L19Rik	258.96							Olfr119	369.07	Unc50	523.444	Olfr1347	45.91							Top2b	701.758
Smad7	16.3414					Dnajc13	257.685							Mir191	369.047	Mdm2	523.231	Hist2h3c1	45.8813							Zfp706	701.601
Dock6	16.2822					Snw1	257.602							1700109F18Rik	368.12	Ubxn2a	523.206	Sema3f	45.3431							3830406C13Rik	701.552
Rpl7a	16.0829					Klhdc2	256.916							Stt3b	365.781	Tmem57	523.101	Dazap1	45.2252							Fundc1	701.293
Cd7	16.05					Nme3	255.875							Shd	365.173	5430435G22Rik	522.744	Gm15455	45.1437							Ddx1	701.154
Adam15	16.046					Dbt	255.82							Neu4	364.791	Rsbn1	522.212	1110032F04Rik	45.0086							Supt20	700.819
Mdga1	15.9753					Ltv1	255.646							Avil	362.394	Rad54l2	522.193	Gm6795	44.8261							Ap1g1	700.737
Gltscr1	15.6863					Alkbh8	254.649							Hey2	361.648	St3gal2	521.851	Gtse1	44.7532							Chchd3	700.633
Gm7520	15.3813					Eif3e	254.637							Spi1	361.033	Slu7	521.118	Polq	44.7143							Sptlc1	700.622
Zfp580	15.308					Scamp1	254.376							Nkpd1	360.881	Ppp2r3a	520.575	Snrpd2	44.683							Riok3	700.564
Naa40	15.1817					Arid4a	254.293							Il27ra	360.677	Zfand5	520.565	Mcm6	44.5673							Ube2b	700.376
D830030K20Rik	14.4801					Fam92a	253.655							Desi2	360.494	Asph	520.562	Dnaja1	44.4366							Dcaf8	700.268
Snrpd1	14.3104					D17Wsu104e	253.277							Col22a1	360.249	Hint3	520.497	Rpl27	44.1526							Lmtk2	700.072
Dynll1	14.232					3110001D03Rik	253.212							AY512931	360.229	Dnajb6	520.07	Dctd	44.1145							Vps54	699.895
Trp73	14.2161					Hmcn1	252.923							Mir188	359.921	Ate1	519.906	Aurkc	43.969							Med23	699.472
Chaf1b	13.1897					Eif3m	252.12							Wfdc1	359.393	Polr3g	519.816	Atp6v0a2	43.8844							Gtl3	699.281
Arhgdib	12.6046					Ddx47	252.005							Akna	358.687	Mapk8	519.466	Hist2h2aa1	43.8409							Zfp62	699.138
Nkg7	12.5466					Acox1	251.803							Prickle1	358.378	Eny2	518.962	Prlh	43.715							Elp4	698.45
Pam16	12.4856					Mrps15	251.616							Chst8	358.08	Gm5488	518.703	Ror1	43.4595							Btrc	698.063
1700028J19Rik	12.2803					Dcun1d2	251.449							Satb2	357.333	Itgb8	518.239	Usp11	43.3896							Lman1	697.576
Rangap1	11.9635					Yes1	250.892							Vav1	356.508	Ppp2r1b	518.222	Lama5	43.359							Ttbk2	697.371
Plac9a	11.7742					Lyrm4	250.478							Iqcd	356.267	Suv420h1	518.065	4930444G20Rik	43.3098							Ube2v1	697.321
Gm7609	11.7198					Pqbp1	250.314							Olfr963	355.929	Cript	517.377	Snx14	43.172							Itfg1	697.089
Mex3a	11.712					Serf1	250.263							Ptprc	355.681	Tbl1xr1	517.229	Etv4	43.1635							Rbms3	695.69
Nhp2l1	11.5467					Sgce	250.209							Szt2	354.36	Slc37a3	516.785	Hist1h2aa	43.1512							Phf20l1	695.25
Ccne2	11.3932					Tlcd1	249.986							5730507C01Rik	353.302	Rps6kb1	516.717	1600014K23Rik	42.8323							Zfp871	695.167
Mall	11.3895					Glb1	249.755							Smok2a	351.901	Coro1c	516.407	Rprl2	42.7844							Ddx42	695.054
Dctpp1	11.3454					Zfp277	249.692							Rnf207	350.905	2510003E04Rik	516.371	Bak1	42.2226							Ccdc84	694.483
Pak4	11.1505					BC031181	249.401							Nlgn3	350.611	Ugp2	516.332	Megf6	42.2073							Mtdh	694.353
Kpna2	10.5419					Klhdc3	249.393							Tmod1	350.139	Pgd	515.364	Cd44	42.1628							2015-09-01	693.853
Nrtn	10.4433					Gde1	248.668							Vax1	349.88	Gsto1	514.86	Ubc	41.8596							Nae1	693.821
Traf4	10.3967					Fam115a	247.686							Nkx2-2	349.735	Fbxl5	514.766	Scaf1	41.6855							Snapc3	693.278
Sox12	10.0646					Txndc9	247.121							Necab1	348.872	Id2	514.47	Ttr	41.5698							Cdk11b	692.831
Rpl19	10.0493					Nbr1	246.56							Barx1	348.257	Nbeal1	514.464	Gm10318	41.1126							Acp2	692.685
Dot1l	10.0153					Aph1b	246.543							Ccdc121	347.677	Mccc1	513.821	Rmrp	40.9157							Hbs1l	692.548
Atp13a2	9.8471					1110057K04Rik	246.291							Camta1	347.5	Eps8	513.609	Gas2l3	40.9123							Os9	692.232
Fzr1	9.55194					Ap1s3	245.938							A530064D06Rik	346.752	Pbrm1	512.589	Fhl2	40.7068							Malsu1	692.049
Impa2	9.3226					B4galnt3	245.395							Foxe3	346.371	Ociad1	511.276	Haus7	40.6483							Nxf1	691.784
Cdkn2c	9.29628					Ctsz	245.228							Tmem125	345.61	Serpinb8	510.109	Anapc15	40.0661							Cnot2	691.237
Acta2	9.04752					Prdx3	245.167							Aldoart1	345.281	Fam171b	510.059	Col4a4	39.928							Mllt4	691.056
Dolpp1	8.96108					Clta	244.157							Rnf182	344.792	Pmp22	509.953	Oxct2b	39.8894							Asnsd1	690.976
Samt1	8.91651					Gstm6	243.736							Lhx3	344.744	Sp4	509.604	Snrpg	39.6803							Dock7	690.291
Lphn1	8.6555					Pygl	243.03							Zfp428	344.061	Plekhf2	509.086	Tonsl	39.6742							Dlst	690.09
Rps4y2	8.59869					Nabp1	242.936							Pou4f2	341.343	Ppp1cb	508.73	Gm5531	39.6574							Casp8ap2	689.868
Arrb2	7.787					Gm8615	242.879							Arid3a	341.313	Tfb2m	508.725	Rprl1	39.2739							Rpl21	689.637
Snrpb	7.67361					Setd7	242.522							Foxl2	340.939	Rbpj	508.573	Wdr90	39.2417							Wdr75	689.389
Slc25a10	7.62769					Enox2	242.421							Gpr68	340.922	Ppm1k	507.203	C2cd4b	38.9783							Cox7c	688.793
Crabp2	7.34962					Mocs2	241.271							Olfr1337	340.673	Sae1	507.092	Mcm7	38.7141							Mmgt1	688.483
Tsc22d4	6.67461					Rc3h1	240.459							Cdh4	340.131	Srpr	506.926	NA	38.4253							Gtf2f1	688.285
Ccl19	6.5294					Acadl	240.395							S1pr4	339.677	Rabep1	505.994	Sox13	38.3824							Top3b	688.207
H2-Ab1	6.47514					Fam188a	238.84							Ctsw	337.087	Dld	505.989	Rtel1	38.2075							Wtap	688.126
Tfap2e	6.30707					Ifrd1	238.695							B4galt5	336.848	Yars2	505.793	Sms	38.0283							Ipo7	688
2310061I04Rik	6.15494					Dynll2	237.889							Ackr2	335.737	Skiv2l2	504.278	Hjurp	37.9676							Rfwd2	688
1700037H04Rik	6.0244					Gfm1	236.551							Slc16a8	335.204	Cul4b	504.25	Pdlim2	37.6818							Hsp90aa1	687.446
Fbxl18	5.94927					Rnd3	236.324							Olfr1497	334.955	Aldh7a1	503.765	Bgn	37.5158							Eif1b	687.344
Tgfb1	5.77089					Usp32	235.839							Ecel1	334.896	Zfp317	503.324	Piezo1	37.4807							Prkci	686.455
Orai2	5.74983					Gla	235.506							Alox5ap	334.839	Smek2	503.307	Pcsk6	37.2291							Fam175a	686.428
Timm17b	5.12717					Pdk3	235.025							Myh7b	334.357	Acpp	502.984	Ppil1	36.2968							Coa3	685.709
Krtcap2	3.78378					Ube2e3	234.735							Olfr598	334.131	Phf20	502.903	Usp17ld	36.2142							Polr2c	685.152
Snapc2	3.75232					Hiatl1	232.91							Rasgrp4	332.977	Spg20	502.868	Ppp1r2	35.9463							Larp4b	684.604
Gm3002	3.355					Tspan7	232.858							Gm16287	332.487	Micu2	502.846	Foxo6	35.9009							Srpk1	684.412
Uxt	3.0015					Fads1	232.106							Adra1d	332.21	Lpgat1	502.628	Trabd2b	35.8046							Tpt1	684.201
Idi1	1.83788					Ell2	231.673							Als2cl	331.558	Mtpap	502.229	Gm16494	35.7446							Spin1	683.563
						Zfp942	231.61							Hp	331.111	Ptp4a2	502.166	Cep192	35.7194							Rai14	682.761
						Ppa2	231.273							Vasp	329.975	Nol8	501.64	Pyy	35.4754							Dctn6	682.608
						Ddx19b	230.897							Dydc2	329.841	Adi1	501.606	A730008H23Rik	35.4421							Dtd2	682.564
						Casc4	230.536							Gorasp2	329.395	Gnai3	501.429	Ost4	35.3899							Palmd	682.075
						Aga	229.947							Olfr299	328.818	Siae	501.422	Mettl23	35.2855							Ppil3	681.992
						Kctd1	229.747							Mapkbp1	328.444	Stag1	501.294	Ppia	35.2273							Zfp869	681.784
						Tmem18	229.737							Nudcd3	328.413	1110001A16Rik	501.077	Pcna	35.0219							Rbms2	680.71
						Pex13	229.151							Fev	328.044	Alg11	500.847	Rpl21	34.8723							Aifm1	680.341
						Dr1	227.885							Rpl23a	328.031	Ddx50	500.663	Npm3-ps1	34.8593							Cnot6l	680.036
						Akap10	227.402							Kcnk12	326.716	Actr8	500.204	Tnnt2	34.7938							Zfp148	680.015
						Rnf122	227.085							Tha1	326.645	Opa1	500.045	Suv39h1	34.7929							Ccser2	679.713
						Chmp1b	227.079							4930404N11Rik	325.98	Stam2	499.973	Lce3c	34.6466							Lamp2	679.517
						Tmem59	227.024							Runx3	325.467	Dennd6a	499.863	Myh9	34.4654							Ndrg2	679.373
						2310014L17Rik	226.947							Foxk1	325.317	Vps35	499.674	Ncapd3	34.2122							Sugp1	679.355
						Ica1	226.812							Gipc3	324.824	Ibtk	499.243	Sap25	33.9943							Uqcrb	678.974
						Ypel5	226.745							Gm4971	324.774	Rab2a	498.868	Rac3	33.8186							Casp8	678.666
						Tpgs2	226.272							Mir673	323.712	Hnrnpc	498.41	Defa25	33.3615							Pitpna	678.552
						Ptpn11	225.932							4930506C21Rik	322.96	Eif2s3x	498.322	Acp1	33.2897							Bmpr1a	678.38
						Gatsl3	224.726							Lck	322.643	Fam134b	498.101	Mycn	33.261							Csnk1a1	677.119
						Eif2s2	224.388							Diras1	321.398	Xpr1	497.819	Fbln1	33.2402							Exoc4	676.758
						Med10	224.058							Klf3	321.234	Znhit6	497.8	Tgfa	33.2289							Appl1	676.67
						Tmem159	223.586							Hfe2	321.158	Mta2	497.492	Syne3	32.2163							Rfesd	676.368
						Igf2r	222.16							Klhl9	320.711	Cd34	497.429	Pappa	32.1286							Rbm15	676.178
						Prkcdbp	221.576							Nfkb2	320.186	Pam	497.171	Wfikkn1	32.0725							Tmed5	675.982
						Dpy19l3	220.211							E130309D02Rik	320.124	Pgrmc1	496.888	Igfbp7	31.9953							Capn7	675.806
						Ctsf	220.056							1500009C09Rik	319.892	Arf4	496.629	Krtap5-4	31.9241							Akap9	675.579
						Sparc	219.839							Trim71	319.543	Lemd3	496.541	Mir680-3	31.7039							Rfc1	675.365
						Kctd2	219.596							Henmt1	319.328	Trim12a	496.172	Vars	31.6348							Tpr	675.053
						Pon3	219.366							Znrf4	318.289	Tmem33	496.001	Prh1	31.1381							Atpif1	674.561
						Zfp131	218.883							Dfnb59	317.447	Dnajc13	495.885	Sprr2a1	30.985							Fyn	673.881
						Klhdc1	218.862							Usp38	316.821	Kcmf1	494.917	1500012F01Rik	30.9567							Acvr1	673.751
						Tcf7l1	218.861							Rspo3	316.406	Ing5	494.905	Cdca7l	30.8089							Terf1	673.711
						Brwd3	218.639							Nrsn2	316.328	Sike1	494.292	Rhbdf2	30.5959							Ptprk	673.327
						Rhobtb2	218.484							Ppp1r1a	315.395	Ggta1	494.054	H2-T10	30.5143							Psme4	672.985
						Arfip1	218.236							Igfbp2	314.668	Rsl1d1	493.872	Lig1	30.1646							Mmachc	672.312
						Ahcy	218.126							Ccdc85c	314.14	Stxbp3a	493.627	Cfp	29.5131							Sephs2	670.993
						Ttpa	217.972							Amy2a5	313.828	Mblac2	493.054	Tpm2	29.0679							Dhdds	670.95
						Pgrmc2	217.893							Tcrb-J	313.635	Mkl2	493.047	Sorcs2	29.008							Kitl	670.393
						Max	217.441							Sox1	313.023	Zfand2a	492.965	Mir25	28.7757							Mrpl13	669.221
						Rab28	217.305							B3gat1	312.737	Arsk	492.706	Rpl27a	28.7388							Nsmaf	668.88
						Hs2st1	216.65							Ssty1	311.813	Otud4	492.431	6720401G13Rik	28.7275							F11r	668.337
						Gyg	216.434							Hs6st3	311.794	Hps3	491.79	Synpo2	28.6986							Setbp1	668.233
						Chpt1	216.31							Cryba4	311.744	Lrrc40	491.24	Tnfrsf12a	28.2757							Riok1	667.719
						Fuca2	216.115							Gm13103	310.481	Matr3	491.005	Nop56	28.1683							Parg	667.187
						Frmd4b	215.772							Bmp3	309.481	Zcchc11	490.956	Klrg2	28.0806							Zfp672	666.657
						Psmd6	215.585							Lhb	308.572	Rc3h1	490.785	Tmem91	27.9926							Itpripl1	666.59
						Duoxa1	215.444							AI747448	308.202	Dzip1	490.561	Cdt1	27.9196							Tbc1d19	666.107
						Ephx2	215.412							Srcrb4d	307.745	1810030O07Rik	490.412	Snord53	27.7415							Zfp606	666.097
						Camk2g	215.352							AI413582	307.668	Col4a3bp	490.257	Rpl29	27.4686							Rsl1	665.713
						Nrep	214.895							Neurl1b	307.398	Fbxo28	490.218	Ccdc34	27.2859							Narg2	665.698
						N6amt1	214.579							4930515G01Rik	306.298	Setx	490.19	Pla2g7	27.067							Chchd5	665.411
						Ostm1	213.719							Wbscr17	306.119	Utp6	489.543	Trib2	26.7851							Mios	665.257
						March8	212.631							Mir182	305.253	Zfp715	489.307	Adtrp	26.4708							2010-09-01	665.159
						Kdelc2	212.246							Gm5891	305.037	Skint4	489.208	Synpo	26.3257							Zfp101	664.009
						Dnajc10	212.242							1700022A21Rik	302.975	Serpinb6a	489.167	Phldb1	26.0098							Gtf2h5	663.913
						Rraga	211.816							1700012A03Rik	302.697	Prkd3	488.711	Ccl19	25.6777							Ppia	663.791
						Fam114a2	210.408							Il2rb	302.593	Prpf40a	488.631	Dbf4	25.588							Serbp1	663.716
						Dcun1d1	209.849							Gpank1	301.664	Eif3j1	488.401	Cyp2s1	25.131							Prpf38b	663.501
						Tprgl	209.345							4930562C15Rik	301.229	Cd99l2	487.996	Snora73a	25.0624							Lgr5	663.32
						Srd5a3	209.236							Snord116	300.722	Rock2	487.288	Scarna13	24.9325							Cox6c	663.218
						Efna3	209.137							Rnu7	299.683	Prpf4	486.899	Rps12	24.6556							AI597479	663.125
						Vopp1	208.269							Tnfrsf13c	299.11	Ptgr2	486.044	Cbx5	24.4667							Rabl2	662.794
						Slc25a38	208.031							Rin3	298.822	Dis3l	485.87	Gm2799	24.3602							Mtcp1	662.29
						Kctd20	207.682							Oxct2a	298.294	Akap7	485.775	Thy1	24.2885							Zfp937	662.231
						Tmem242	207.522							Foxd4	297.433	Zfp866	485.749	Lgr6	24.1942							Pdia3	661.415
						Skp1a	207.126							Dock6	296.125	Cyp39a1	485.574	Ppox	23.941							Ppil2	661.373
						Isg20l2	207.023							Foxq1	296.01	Sepsecs	485.013	Fscn1	23.9095							Zranb2	661.258
						Rybp	206.776							Spata25	295.854	Cpne3	484.21	Plb1	23.9029							Nras	661.019
						Acvr1b	205.804							Nfkbid	294.111	Pip4k2c	483.819	Gm5172	23.7696							M6pr	660.588
						Dmxl2	205.517							Grap2	293.976	Serpinb11	483.767	BC056474	23.6457							Numb	660.558
						NA	205.251							Ckm	293.706	Gmps	482.832	Spin2-ps1	23.6416							Zfp81	660.163
						Hexim1	204.353							Gpd1l	292.09	Sdc2	481.639	Edn2	23.487							Pea15a	659.842
						Actr6	204.049							Gm6762	290.992	Dsel	481.569	Gm14851	23.1899							Sec11a	659.274
						Hmgn5	203.556							Scrn2	290.43	Pcnxl4	480.555	Rpl23a	23.1241							Fam103a1	658.76
						Lyrm5	203.447							Cited1	289.763	D10Wsu52e	480.246	Gapdh	22.834							Spidr	658.753
						Rad17	203.29							Cmip	289.636	Spata6	479.58	Gm5803	22.684							Rbm6	658.419
						Lamtor3	203.006							Itgal	288.983	Ppp2r5e	479.56	Terc	22.682							Zkscan3	658.355
						2610001J05Rik	202.861							Rtl1	288.893	Dnm1l	479.305	Dyrk1a	22.5962							Ankrd49	658.214
						Hsd17b4	202.327							Lat	288.458	Gpbp1	479.18	Rmnd1	22.5149							Pnn	658.176
						Nme7	201.906							Ppapdc1a	287.819	Mmaa	479.072	Acad9	22.5131							Cdk5	657.966
						Serinc5	201.453							Six2	286.491	Zfp141	478.955	Tsku	22.3632							A630089N07Rik	657.901
						Sub1	200.517							Col9a2	285.817	Zfp110	478.84	Taf1d	22.2975							Npm1	657.103
						Ktn1	199.152							Uncx	284.371	Pawr	478.496	Idi1	21.9522							Abi2	657.035
						Dcun1d4	198.256							Trav14d-3-dv8	284.213	Pdzrn3	478.496	Tgfb1i1	21.7664							Rnf168	656.773
						Leprotl1	197.856							C1qc	283.805	Nckap1	477.66	Zfp692	21.7569							Rbm3	656.323
						Lipa	197.237							Gm4005	282.439	Camk2n1	477.578	Vegfa	21.537							Bnip2	655.54
						Lrrcc1	196.774							Rrp12	282.289	Man1a2	477.569	Slco3a1	21.5164							Map3k8	654.79
						Slc31a1	196.739							Prf1	282.216	Prlr	477.275	Hmgb1	20.4066							Lgr4	654.788
						Dhx40	196.355							Csf1r	282.053	Phkb	476.941	Foxi3	20.1345							Taf15	653.949
						Ccdc174	195.722							Gm1549	281.927	Set	476.902	Sirpb1a	19.9123							Atp6v1g1	653.842
						Dcaf10	195.671							Rac2	280.033	Isg20	476.479	Adamtsl5	19.2498							Larp7	653.745
						Cbx1	195.486							Fndc5	279.95	Tm9sf2	475.989	Hmgb2	19.0475							Atad2b	653.744
						Myd88	195.437							Otx1	277.028	Thoc3	475.753	Timm21	18.922							Set	652.057
						Atg4a	195.011							Sox14	276.545	Aatf	475.653	Krt17	18.4279							Ubl4	651.843
						Xylt1	194.599							Yes1	275.569	Slc25a36	474.029	Chdh	18.3502							2610008E11Rik	651.275
						Usp6nl	193.91							Ntm	274.708	Hspd1	473.715	Cyp27a1	18.0158							Phf3	650.938
						Serpinh1	193.373							Iqca	274.565	Ar	472.917	Xrcc3	17.928							Tdg	650.763
						5730508B09Rik	193.236							Macrod1	274.512	Usp25	471.624	Sirt4	17.8697							Etv3	650.372
						Tspan6	192.576							Zfp316	273.427	Myof	471.493	Rps25	17.8362							Snrpb2	650.224
						Eif2b2	192.214							Cacnb2	273.175	Gdap2	471.469	Slc7a1	17.7158							Scai	649.572
						Rap2c	191.898							Trdn	273.118	Mcm9	471.387	Ly6e	17.7048							Fndc3a	649.294
						Ifnar2	191.831							Arnt2	272.33	Nop2	470.484	Zfp264	17.5552							Nono	649.232
						Kif2a	191.726							Dedd2	271.751	Cdkn2aip	470.352	Ttc12	17.5443							Appl2	649.108
						Wdr61	189.952							Wnt10a	271.212	Pfkfb2	470.246	Ass1	17.3941							Pex19	648.998
						Gnptab	189.941							Gna14	270.882	Col12a1	470.064	Gstp1	17.2789							Nsfl1c	648.828
						Ubtd2	187.41							Mypop	269.629	Gnpnat1	469.216	Rps8	17.062							Tmem209	648.485
						Fuca1	186.937							Tox2	269.375	Sirt1	469.053	Cdh11	16.5427							Papd4	648.478
						Tmem223	186.822							Cxcr6	267.304	1110037F02Rik	468.459	Rpl19	16.3091							Rnf2	647.917
						Tmem126b	186.427							Vmn1r122	267.02	Idh1	468.279	Rpl13	16.1567							Ube2d1	647.537
						Dnaja1	186.239							Nlrc5	266.448	Eps8l3	468.17	Snora73b	16.1109							Fstl1	647.124
						Tatdn1	185.58							Olfr456	266.376	Naa30	468.094	Olfr401	16.0457							Sgk3	646.639
						Srp9	185.57							Pin4	265.704	Inpp4b	467.976	Gm14484	16.031							Tmem126a	646.608
						Bet1l	185.368							Slc4a8	264.521	Prnp	467.562	Fosl1	15.9482							Zfp945	646.336
						Kpna1	184.776							Slfn10-ps	264.232	Bivm	467.53	Gm9513	15.8281							Rbm22	646.279
						Tdg	184.023							Tbc1d10b	263.877	Abce1	467.331	Ssty2	15.4922							Yeats4	646.249
						Ddx19a	183.765							Oprd1	261.354	Exoc1	466.893	Rps2	15.2354							S100a10	645.694
						Atp6v0e	183.464							Rb1cc1	260.757	St7l	466.839	Tnk1	15.2348							Dhrs3	645.678
						Commd10	183.448							Masp1	260.624	Riok2	466.801	Ngfr	15.0288							Dgcr8	645.535
						Sesn3	181.698							C77080	259.249	Fam221a	465.994	Nupr1	14.9202							Usp14	645.273
						Lyplal1	181.281							Fitm1	259.239	Akap11	465.271	Snora3	14.5243							Lyar	644.919
						Scpep1	181.273							Ggt7	259.183	Dnajc14	465.222	Cyp27b1	14.2817							Adam17	644.771
						Snx4	180.457							Cebpb	258.567	Aldh2	464.448	Syde1	13.7268							N4bp2l2	644.718
						Casp3	180.274							Ccdc64b	257.446	Afg3l2	464.405	Rpl15	13.6802							Uevld	644.594
						Mfge8	179.778							Bicc1	257.428	Ttpa	464.226	Apoc1	13.1113							Mrps33	644.491
						Fam98a	179.606							BC021614	257.355	Nfkbib	463.842	Ldlr	13.0799							Cd9	644.425
						Lnp	179.595							Galr3	256.514	Armcx1	463.751	Hmbs	12.8048							Ppt1	644.293
						Mpv17	179.587							Slain1	256.135	Wdr35	463.713	Klk10	12.77							Srp54c	644.233
						Abracl	179.19							Adamts14	255.291	Zfp706	463.045	Dmrtc1c1	12.532							Mettl5	644.082
						Atp6ap1	179.059							Tox3	254.627	Cog5	462.79	Igfl3	11.9681							Eprs	643.892
						Chmp1a	178.545							Itgb2	254.618	Vdac2	462.45	Paox	11.8863							Pbrm1	643.847
						Phf8	178.263							Casz1	253.873	Ppp3cb	462.173	Ccnd1	11.8806							Phf21a	643.746
						Eif2ak2	177.159							Parp10	253.303	Purg	461.606	Pkn3	11.8234							Nrbf2	643.59
						Atg5	176.656							Ptk6	252.588	Ankrd50	461.15	BC003965	11.7899							Slc38a9	642.406
						Trmt1l	176.59							Sox6	252.453	Nek7	461.045	Atp5l	11.4915							Zfp655	641.922
						Zfyve20	175.771							Dusp5	252.15	Rhoq	460.862	Snord95	11.4457							Itgb1	641.856
						Pno1	175.644							Lrp4	251.51	Smc3	460.791	Gm5523	11.2899							Lrrc49	641.814
						Wdr19	174.431							Prss46	251.401	Lactb2	460.612	Rfx2	10.5795							Gstk1	640.601
						Ldb2	174.225							9430008C03Rik	250.301	2700060E02Rik	460.389	Rpl31	10.3394							Tceb3	640.463
						Ccnyl1	174.016							Tesc	249.785	Itga5	460.097	Hoxb9	10.2827							4930506M07Rik	640.453
						Atp5g3	173.546							Rpl10a	249.37	Tbc1d12	459.208	Rpl35a	9.95397							Gm14288	640.372
						Gpatch11	173.419							Chst3	249.163	BC018507	459.124	Eno1	9.87193							Ift81	640.047
						Heph	173.386							Tmem191c	248.535	Fhdc1	458.951	Sqle	9.74143							Pa2g4	639.639
						Rpl23	173.255							Apold1	246.475	Marcks	458.819	2410127L17Rik	9.52639							Peli1	639.506
						Usp46	172.755							Aqp5	244.706	Phc3	457.347	Lgals4	9.31942							Nt5c3b	639.442
						Sord	171.633							Rdh9	244.695	Khdrbs1	457.295	Rps4x	8.90571							Arfgef1	638.903
						Ggh	171.264							Lhpp	241.972	Ifi27	456.738	Axl	8.77719							Luc7l2	638.838
						Cdc42ep2	171.017							Foxe1	241.551	Nf2	455.643	Nrbf2	8.75675							Gm20939	637.845
						Ube2j2	171.015							Krtap10-4	238.172	Got1	455.137	Nhsl1	8.73127							Zscan26	637.807
						Zc3h12c	170.171							Mir666	237.822	Kctd9	455.101	Mob3b	8.68701							Rras2	637.711
						Ndufaf1	169.827							Card14	237.308	Mtmr12	454.72	Rpl39	8.59554							Cdc37l1	637.668
						Bmp2k	169.793							A530040E14Rik	236.796	Zbtb37	453.914	Gm9992	8.55842							Tmed10	637.326
						Hspa13	169.609							Snord49a	235.209	Dopey1	453.558	Prp2	8.41042							Immp1l	637.314
						Morf4l1	169.578							Ppp3cc	234.358	Fgd6	453.548	Hoxd8	8.20741							Dpy30	636.459
						Hid1	169.143							Irf4	233.566	Ift80	453.476	AW822252	8.20137							Immt	636.222
						Ppp1r11	168.883							Ypel4	231.603	Tm9sf3	453.468	Zdhhc1	8.10643							Nudt4	635.549
						Tapt1	168.832							Proser2	231.151	Pds5b	453.218	Rccd1	8.09994							Ssbp1	634.688
						Dync2li1	168.417							Ott	229.123	Uvrag	453.162	Hoxd4	8.07386							5830418K08Rik	634.674
						Ptn	168.375							Lcp2	227.874	Dhx36	452.794	Lmcd1	8.0211							Golga1	634.393
						Ttll7	168.317							2001-09-01	227.868	Nr3c1	452.418	Nrg1	7.87987							Zmym2	633.454
						Pccb	167.907							Ttc9	227.153	Aktip	452.021	Grp	7.72279							Calm2	633.418
						Prdx2	167.386							Arhgap27	226.96	Sos2	450.93	Efemp1	7.63988							Rbm39	633.292
						Serf2	166.671							E030011O05Rik	226.057	Nt5e	450.625	Ifnz	7.46205							Zfp953	633.175
						Prkrir	166.64							Olfr46	224.665	Agps	449.778	Hoxc5	7.40774							Stk38	633.072
						Usp30	166.301							Camk1d	223.208	Zdhhc13	449.483	F3	7.34893							Cbfb	632.205
						H3f3a	165.967							Kazald1	222.854	Ppap2a	449.242	Defb6	7.3251							Cald1	632.092
						Asap1	165.545							Notch1	222.163	Pcca	449.174	Adamts3	7.15889							Hsp90b1	632.074
						Hexa	165.299							Ctla2b	220.969	Ywhab	448.497	Lasp1	7.15156							Cdc123	631.932
						Bet1	165.084							Snord87	218.777	Mlx	448.196	Wnt7b	6.84323							Tmem87a	631.913
						Topors	163.745							Mrpl28	217.753	Gstm5	447.732	Ngf	6.82548							Ndufb4	631.889
						Cgrrf1	163.502							Cdkn2b	217.602	Krt24	447.625	Egr2	6.47959							Carkd	631.769
						Lgmn	163.136							Pcx	215.293	Syncrip	447.611	Rpl35	6.45519							Spcs3	631.536
						Kif21b	162.613							Emb	212.827	Pcmtd1	446.818	Hivep3	4.51705							Amn1	631.469
						Btd	162.396							Bmp7	212.336	Garem	446.789	Rpsa	2.92213							4932438A13Rik	631.302
						Piga	162.155							Lpo	211.635	Sgms2	446.444	Lgals3bp	2.59693							Gspt1	630.556
						Acbd5	161.815							Mir344	211.089	Rbbp8	446.165	Fancf	2.36011							Tmem175	630.443
						Entpd5	161.464							Vmn1r114	210.712	Zfp445	445.132	Alb	0.478433							Baz2b	630.063
						Hars2	160.702							Clca3	210.529	Zbtb20	445.035									Mff	629.819
						Srr	160.524							Lgsn	209.687	Mtx2	444.945									Tjp1	629.462
						Ism1	160.156							Abhd17a	208.988	Prps1	444.806									Pdap1	628.605
						Trim59	159.565							Hcls1	208.144	Lnpep	444.631									Usp40	627.383
						Nup35	159.263							Ubash3b	206.438	2610002M06Rik	443.715									Timm17a	627.079
						0610009B22Rik	159.032							Tmem26	204.209	Nfib	443.513									Mterf	626.168
						Rlf	158.894							Trim47	203.972	Nop58	443.427									Rnf25	625.942
						Fam174a	158.436							Ripply3	203.53	2700089E24Rik	443.414									Cct3	625.785
						Sh3kbp1	157.837							Usf1	202.981	Decr2	443.244									Tardbp	625.714
						Akr1a1	157.639							Lrch1	201.158	Osgep	442.965									Eif4e	625.589
						Cetn2	157.53							Plp2	196.394	Nmnat1	441.642									Zfr	625.534
						Tor3a	157.036							5730559C18Rik	195.46	Rab3gap1	440.949									Tuba1b	625.397
						Mir22hg	156.811							Itgae	195.133	Dmxl1	440.922									Ttc37	625.191
						Rsph9	156.786							Krt78	193.791	Hoxc8	440.466									Slc25a36	625.003
						Maf1	155.782							Laptm5	193.574	Cbx4	440.408									Zfp111	624.45
						Kif1c	155.015							Gm8096	192.342	Pdzrn4	440.036									P2rx7	624.436
						BC027231	154.444							Notch3	192.292	Nt5c3	439.779									Snrpd3	624.368
						Ppp1r13b	154.048							Rps21	191.376	Xiap	439.505									Plrg1	624.098
						Ildr1	151.34							Mycl	190.637	Vti1a	439.252									Abhd11	623.829
						Tmem54	151.289							Pak6	188.716	Rtfdc1	439.134									Eif4a1	623.75
						Galk2	150.917							Gfod1	187.654	Zhx2	438.826									Fcho2	623.663
						Mxra8	150.627							Extl1	186.129	Ptp4a1	438.59									Uri1	623.659
						Ifngr2	150.562							Prkcb	186.108	Mettl21d	438.122									Hus1	623.5
						Plxna2	150.264							Wnt11	185.371	Taf1a	437.264									Ints12	623.269
						Lsm10	150.029							2310007B03Rik	181.728	Nampt	436.989									Thsd1	623.236
						Dnaja4	149.785							Lrrc8b	180.979	Cluap1	436.813									Acot13	622.859
						Tmem120b	149.783							Pard6b	179.225	Prps2	436.726									Dhx9	622.776
						Uap1l1	149.454							Slc9a7	175.322	Lclat1	436.709									Atp9b	622.535
						Dcp2	148.502							Tyrobp	173.182	Psmd5	436.429									Etfdh	622.528
						Esam	148.188							Lrig1	171.304	Gnpda2	436.248									Idnk	622.418
						Zfp667	147.845							Ces1d	169.469	Usp1	435.564									Zfp770	622.214
						Gpr87	147.638							Bahd1	168.333	Cdkn1b	434.894									Hspa8	622.091
						Chic1	147.632							Unc13d	166.75	Iqcb1	434.17									Orc3	621.833
						Pm20d1	147.618							Rpl41	164.74	Dedd	434.047									Aph1c	621.059
						Mmrn2	147.395							Slc25a48	163.62	Dip2c	433.781									Hnrnpm	620.919
						Mras	147.237							Gpaa1	162.522	Chic2	433.708									Ppp2r5c	620.561
						Trim2	147.216							Sly	162.065	Ifih1	433.142									Neo1	620.158
						Fam83d	146.914							Trat1	160.207	Zfx	433.076									Nhlrc3	619.976
						Cbx8	146.442							Elf2	159.507	Rab1b	433.024									Zfp273	619.965
						Taf11	145.454							Fam89a	158.41	Senp2	432.575									Ift88	619.958
						Cdc42se2	145.151							Cd2	158.19	Exoc5	432.566									Zfp960	619.718
						Fam132a	145.095							Trex2	157.76	Plin2	432.451									Snrpa1	619.499
						Fhit	144.831							Mvk	156.499	Alms1	431.677									Pnpt1	619.293
						Fgd4	144.43							Krt23	154.962	Fbxo30	431.508									2810474O19Rik	619.232
						Mmd	144.288							Lcp1	154.94	Ctps2	430.817									Mina	618.87
						Ide	144.22							Npr3	154.453	Tmem68	430.078									Def6	618.856
						Ptcd2	143.692							Fbxo6	153.864	Senp5	429.212									Srsf1	618.809
						Mboat2	143.388							Tcrg-V1	152.86	2610034B18Rik	429.152									Fam60a	618.107
						Zfp407	142.792							Raf1	151.06	Ap3m1	429.019									Psmg2	617.979
						Slc35d1	142.47							Dnajc6	151.039	Cdc42ep3	428.491									Homez	617.707
						Rab7l1	142.268							Cd8a	147.664	Pttg1ip	428.485									Plgrkt	616.517
						Rbm25	141.978							Fgfbp1	143.219	Sppl2a	427.687									Vcpip1	616.41
						Pctp	141.745							Dtx4	142.643	Lancl2	427.337									Sarnp	615.357
						Rwdd4a	141.472							Selplg	140.619	Ltn1	427.24									Arhgef5	615.284
						Sytl2	141.251							Tfap2c	139.565	Ttc3	426.072									Cdc16	614.256
						Mfsd1	140.928							Ehf	138.049	Cirh1a	425.768									Gsk3b	613.721
						Surf1	140.751							Tnf	134.997	Tmem5	425.633									Tnfaip1	613.491
						Pggt1b	140.166							Myl6	134.574	Dab2	425.441									Ptbp2	612.238
						Spats2	140.096							F830045P16Rik	131.852	5730455P16Rik	424.814									Ccnt2	612.008
						Gprc5c	140.044							Adora3	129.912	Clcc1	424.749									Ndufs7	611.739
						Tmem9b	139.836							Mmp28	129.087	Gtf3c6	424.676									Dclre1a	611.061
						Eif4a3	139.681							Tjp3	128.761	Mier1	424.094									Bmpr2	611.024
						Fam3c	139.621							Cd53	128.68	Slc30a9	423.804									Psmd14	610.904
						Tmem40	139.423							Thbd	124.259	Mob1a	422.528									1110012L19Rik	610.84
						Rab31	139.399							Cd52	123.364	Psmd2	422.28									Smek1	609.984
						Pi4k2b	139.364							Map3k14	122.922	Acadsb	421.852									1200014J11Rik	609.91
						Ttc17	138.894							Ly6g5b	122.184	Stox2	421.569									Pex3	609.874
						Pla2g15	137.735							Irf2bpl	121.539	Spats2l	421.213									Nup88	609.176
						Tm2d1	133.387							Casp4	116.983	Dkk3	420.846									Uspl1	608.484
						Cdc5l	133.364							Abcc4	116.308	Gmcl1	420.167									Gprasp1	608.471
						Tnfrsf11b	133.323							Gm5622	114.943	Pdpr	419.867									Csnk1g3	608.103
						Prkd1	132.96							Gramd1b	114.862	Mapre2	419.119									Pabpn1	607.769
						Tmem30b	132.509							Psmb8	111.632	Arhgap44	418.482									Hprt	607.491
						Ctgf	132.245							Paox	109.153	Rngtt	418.022									Zbtb24	607.259
						4930430F08Rik	132.036							Sult2b1	108.939	Wdsub1	417.953									Polb	607.228
						2010107E04Rik	130.597							Entpd2	108.561	Mat2a	417.528									Sfrp1	606.804
						Hiat1	130.166							Csrnp2	108.193	Glud1	417.422									Srsf5	606.607
						Zfyve16	130.153							Fcer1g	107.653	Kat6b	416.722									Ptma	606.123
						Fzd9	129.897							Cd96	104.823	Cog6	416.66									Ap1s1	605.976
						Prkra	129.141							Rpp25	103.096	Lpar6	416.385									Ube4a	605.871
						Tmem50b	128.99							H2-DMa	102.537	Cdkl5	416.303									Psmb7	605.073
						Arhgef2	128.324							Cyfip2	100.306	Plekha3	415.732									Myl12a	605.046
						Spty2d1	127.458							Dab1	98.7464	Polr2b	415.729									Tasp1	604.868
						Aamp	127.192							Nxph4	98.0787	Cpe	415.625									Atpaf2	604.731
						Cnn3	126.857							Man1c1	97.4184	Lonp2	414.807									Galm	604.576
						Qsox1	126.805							Apobec3	92.9172	Stx12	414.482									Morf4l2	604.442
						Brd1	125.531							Nbeal2	89.9152	Txnrd3	414.438									Calm1	604.417
						Tspan13	124.988							Pcdh19	89.1047	Stk16	414.264									Prelid1	604.414
						Sdc1	124.359							Hpse	85.0443	Impad1	414.259									Prkag1	604.226
						Atp6v0d1	124.114							Cldn4	84.8719	Stxbp4	414.153									Actg1	603.535
						Pde6d	123.61							Dnpep	78.4263	Atp6v1a	414.086									Oser1	603.488
						Map2k6	123.053							Celsr2	76.459	Fnip1	413.942									Zkscan1	603.268
						Srd5a1	122.813							Mgst3	75.9255	Csrp1	413.873									Mrpl49	602.852
						Tekt2	122.521							Mc5r	75.4031	Dap3	413.521									Slc25a40	602.846
						Ifi30	122.475							Snord22	75.1636	Uhmk1	413.343									Gpx4	602.258
						Polr2g	121.785							Tspo	74.9007	Elmo2	413.138									Rgs19	602.16
						Jazf1	120.926							Avpr1a	74.7721	Serf2	413.135									Polr1d	601.798
						Lrrc4	120.741							Scd3	74.3702	Rhot1	412.969									Xpo1	601.784
						Napepld	120.394							Rpl37a	74.1196	Pla2g4a	412.777									Tram1	601.43
						Plvap	119.317							Snhg8	73.8206	Pi15	412.69									Iqce	601.255
						Tmem128	118.742							Ascl2	69.7678	Isoc1	412.471									Eif2a	600.612
						Peg3	118.25							Maob	69.5531	Trappc13	411.735									Lrif1	600.071
						Pex11a	117.751							Syne1	69.1189	Vsnl1	411.077									Tab2	600.046
						Mzt2	117.679							Mpv17l2	66.678	Ept1	410.689									Dcaf6	599.771
						Ogdhl	116.882							Meis2	63.9982	Kbtbd2	410.273									Psma4	599.522
						Orai2	116.778							Zbtb42	62.098	Cbx3	409.47									Ppp1cc	598.993
						Samd12	116.328							Nfatc2	61.7511	Dimt1	408.722									Farsb	598.866
						Tmem243	116.07							Irf5	61.3736	Ctps	408.442									Polr2k	598.859
						2410066E13Rik	115.946							Gpt2	56.0095	Mrpl51	408.3									Fbxo38	598.47
						Dnajc21	115.795							Tmem115	55.79	Wdr36	407.357									Arel1	597.731
						Acbd6	115.69							Rasa3	55.4197	AA415398	407.354									Fubp1	597.63
						Aqp3	115.157							Gpt	49.4156	Ctsh	406.922									Dph7	597.59
						Eng	113.935							Slc8b1	48.5521	Fzd3	406.911									Dnajc13	597.247
						Prss8	113.857							Marveld2	45.9411	Retsat	406.827									Arhgef25	597.076
						Ergic3	113.25									Wdr47	406.5									Hnrnph3	596.446
						Rab23	112.874									Prpsap2	406.14									Zbtb26	595.192
						Pfn2	112.7									Atp6v1h	405.916									4933436C20Rik	594.725
						Igdcc4	112.626									Trps1	405.646									Ncor1	593.986
						Fgf18	112.251									Irf2	404.825									Trp53bp1	593.843
						Map1lc3b	110.555									Cmtm3	404.397									2210018M11Rik	593.52
						Myoc	110.438									Tmem41b	404.076									Papola	593.448
						Phax	109.884									0610037L13Rik	404.058									Ankrd17	593.064
						Gabre	109.246									Osmr	403.713									Thrap3	591.568
						Fam118b	108.762									Trim23	403.468									Tmem39a	591.486
						Bscl2	108.312									Kat7	402.973									Ipo8	591.027
						Sgtb	108.128									Mpp1	402.66									Rpl5	590.967
						Slc22a22	107.721									Gpsm2	402.572									Trim33	590.959
						Gstm4	107.648									Itga2	402.169									Pura	590.476
						Ociad2	107.554									Nxt2	402.103									Rbm41	590.39
						Vwf	107.552									Oxct1	401.73									Hdgf	590.211
						Acp5	107.455									Mlh3	401.528									Oxsr1	590.029
						Rhog	107.438									Hivep1	400.974									Skap2	589.881
						Nudt22	106.502									Ldha	400.842									Mrpl50	589.844
						Tmtc1	106.372									Gm1943	400.67									Zfp563	589.626
						Cyb561a3	105.952									Aff1	400.214									Nek4	589.048
						Cyb5r4	105.565									Rpl3	399.39									Nhp2l1	588.977
						Apex1	105.523									Ddx20	399.008									Mtfr1	588.796
						Nceh1	104.614									Lysmd3	398.864									Slc10a7	588.767
						Tcea3	104.384									Bbs7	398.649									Megf9	588.676
						Dcps	104.36									Vdac1	398.388									Rbmxl1	588.325
						Apopt1	103.734									Sec14l4	398.092									Myo5a	588.075
						Gdf10	103.362									Gnb1	397.984									Lman2l	586.623
						Sumf1	102.255									Llph	397.433									Lrrc57	586.444
						Ralb	101.226									Rfx5	397.101									Srsf7	585.918
						Arrdc4	100.827									Use1	395.813									Vapb	585.485
						Atp6v1f	100.634									Slain2	395.78									Xrcc5	585.019
						Fez2	100.311									Pptc7	394.38									Gnl3	584.997
						Nasp	100.204									Atp8a1	394.123									Mrpl19	584.833
						Mrpl9	99.4985									Rbm45	393.945									Lypla1	584.344
						Ppargc1a	99.4008									Hnrnpa3	393.224									Zhx3	584.089
						Pdrg1	98.8971									Pros1	392.376									Ythdc1	584.056
						Nudt11	98.2382									Phip	391.367									Pcgf3	583.656
						Exoc3	97.8242									Aldh3a2	391.324									Hsd17b12	583.64
						Hsp90aa1	97.819									Lyst	391.184									Zfp113	583.464
						Cpt2	97.7802									Trp53i11	391.002									Tdrd3	583.398
						Man1a	97.4237									Aim1	390.474									Ttc14	583.06
						Leprel4	96.7935									Mtmr11	390.464									Anapc4	582.843
						Kctd21	96.2859									Hltf	389.898									Tbc1d23	582.671
						Prkch	95.6514									Rab6b	389.468									Esco1	582.458
						Taf13	95.3828									Grem1	389.249									Ndufab1	581.738
						Atxn7l3	95.3325									March6	386.25									Prkrip1	581.604
						Tnfrsf18	94.4464									Fam13c	385.691									Mapk6	581.196
						Pkn1	93.8123									Iws1	385.446									Mir7-1	581.101
						Cbr1	93.5885									Spryd7	384.72									Naa60	580.37
						Psmd7	93.312									Tle4	384.463									Chmp2b	580.193
						Mpst	93.1927									Plcb4	383.938									Tspan31	579.88
						Rnf7	92.8307									Ctnnal1	383.393									Sephs1	579.541
						Mmp11	92.7112									2510002D24Rik	383.341									Nufip2	579.102
						Slc46a1	92.4195									Rhoj	382.779									Sass6	579.059
						Atp6v0e2	92.1466									Rtca	382.755									Paics	578.992
						Ankrd22	92.0809									Ubr7	382.739									Epm2aip1	578.516
						Tek	92.0236									Ctage5	382.664									C1d	578.462
						Rbfa	91.4066									Rell1	382.632									Zc3h7a	578.375
						Cnot8	91.3016									Slc39a8	382.488									Prdm10	578.322
						Cdca7	90.4744									Smim19	380.88									Nck2	578.241
						Prkaa2	89.7026									Arl3	380.819									Sfr1	577.674
						Il17rd	89.6853									Samd4	380.783									Esd	577.093
						Tspan9	89.614									Pcyox1	380.703									Txn1	577.092
						Srd5a2	89.5614									Stambpl1	380.571									Enpp1	576.365
						Mylip	89.2795									Cdk2ap1	380.497									Cep95	576.212
						0610012G03Rik	88.8314									Nemf	379.819									Tbck	576.195
						Sparcl1	88.7327									Lactb	379.783									Cct6a	575.792
						Fabp4	88.6206									Ttll1	379.404									Cyb5d1	575.657
						Glo1	88.371									Cacna1c	378.091									Bloc1s1	574.607
						Nptx1	88.1049									Socs4	377.844									Sec61a2	574.232
						Clec11a	87.8121									Fn3krp	376.769									Lmbr1	574.205
						Lsm11	87.7832									Dennd4c	376.636									Zfp212	573.908
						Abcg2	87.0592									Ints8	376.001									Pak1ip1	573.817
						Kdm1b	86.7164									Fig4	375.668									Erbb2ip	573.776
						Ykt6	86.7012									Ptbp3	375.034									Cttn	573.556
						Isca1	85.6615									Impact	374.544									Mrps22	573.494
						Pde8a	85.161									Ccdc82	374.401									Zcchc17	573.327
						Snapc5	85.161									Bpnt1	374.083									Mtx3	573.16
						Ramp2	84.8063									Cryz	374.067									Lrrc59	572.565
						Capg	84.1572									Tmed4	373.524									Smdt1	572.405
						Ptprb	83.7081									Vps8	373.18									Ipo11	572.377
						Tbcb	83.5631									Ugcg	372.896									Rab3gap2	571.709
						Gm3771	83.5269									Rufy2	372.503									Scnm1	571.682
						Ak1	83.0784									Atp8b1	372.426									Arl8b	571.477
						Stx6	82.7173									Tuft1	372.41									Dguok	570.6
						Serpinb3b	82.5472									Sh3pxd2b	372.093									Hnrnpf	570.555
						Gns	82.2104									Morc3	371.964									Tsr2	569.946
						Pcolce2	82.0416									Acad8	371.778									Htra2	569.856
						Cytl1	82.0115									Uckl1	371.71									Ppih	568.934
						Rasl11b	81.9931									Tmem135	371.568									Ensa	568.23
						Lrg1	81.858									Cox20	371.393									Cnih	567.792
						Myh14	81.3865									Arhgap42	371.372									Msn	567.768
						Chat	81.2287									Angptl2	371.078									Wdfy1	567.624
						Noa1	80.829									Sugt1	370.99									Capza1	567.468
						Gpr116	80.6821									Cldn25	370.728									Psmd2	567.247
						Bmp2	79.5773									C87436	368.546									B930095G15Rik	567.046
						Unc119	79.1251									Slc30a1	368.435									Rexo2	566.619
						Emcn	78.5998									Prpf39	368.276									Zufsp	566.569
						Jam2	78.0235									Atp5f1	367.953									Rad52	566.462
						Tbc1d30	77.3571									Cers2	367.118									Mcee	565.225
						Spcs1	76.7521									Fbxo22	366.391									Rrbp1	564.716
						Cdh5	76.5769									Capza2	366.041									Becn1	564.338
						Pepd	76.4795									Rpl7l1	365.684									Ptar1	564.336
						Ippk	76.366									Aaed1	365.456									Zfp422	564.189
						Odc1	76.0615									Aldoc	365.388									Prpsap1	563.949
						Fam84b	75.6198									Prelid1	364.864									Thoc1	563.564
						Tspan4	75.1162									Hspa9	364.203									Cryzl1	562.718
						Aven	74.5922									Ankib1	364.018									Tax1bp3	562.717
						Manba	74.4559									2310057M21Rik	363.797									Bbx	562.361
						Pecam1	74.4152									Airn	363.629									Zfp958	561.995
						Gdpd1	73.4446									Fhl1	363.297									N4bp2	561.932
						Atp6v0c	72.1761									Anxa6	363.296									Arhgap21	561.694
						Pgm5	71.2113									Tmed7	362.822									Arpc3	561.121
						Cacnb2	70.5684									Dusp16	362.669									Slc25a3	561.096
						Gpr137b-ps	70.2588									Atp13a3	362.289									Psmb3	560.499
						Nebl	69.4389									Sardh	361.707									Efna1	560.429
						Slc35f6	69.2036									Hadh	361.579									Hspa4	560.39
						Marcksl1	69.0445									Klhl7	360.156									Hmox2	560.297
						Slc26a2	68.882									Fam126b	359.937									Alg9	559.583
						Nans	68.6922									Dhrs1	359.436									Memo1	559.533
						Gzf1	68.4644									Ankrd12	358.938									Gxylt1	557.954
						Wdr92	68.4533									Pogk	358.874									2700049A03Rik	557.93
						Slc45a4	68.1282									Trim24	358.799									Prrg4	557.761
						1810058I24Rik	68.0039									Ciao1	358.732									Aldh18a1	557.581
						Slc7a6	67.7704									Sdr42e1	358.585									Ammecr1l	557.131
						Cacnb1	66.3478									Utrn	358.437									Rpl17	556.96
						Ebp	66.1813									Pex1	358.054									Nfyb	556.929
						Nrip3	65.6539									Clip1	357.194									Ubxn4	556.637
						Pdia5	65.3216									Gfra1	355.209									Senp6	556.244
						Fam102b	65.1582									Gpc6	354.759									Cdc42	556.222
						Pithd1	65.108									Gramd3	354.182									6820431F20Rik	555.929
						Mxi1	65.0373									Phlpp1	353.752									Golga7	555.279
						Pgap2	64.864									C1galt1	353.343									Atp6v1d	554.334
						Erp29	64.7049									Nr2c1	353.164									Ankle2	554.168
						Cd93	64.6271									Htatsf1	352.285									Qtrtd1	553.24
						Lbp	64.6106									Igsf10	352.04									Ddhd2	553.227
						Zfp467	64.4801									Zfp518a	351.945									Rb1	552.763
						Cbr3	64.434									Copz2	351.774									Zc3h13	552.172
						Mob2	64.067									Ppil6	351.233									Ikbip	552.168
						Krt71	63.5244									Gk5	351.193									Elp2	551.741
						Bin1	63.4539									Cd151	351.154									Inadl	551.703
						Fkbp10	62.7283									Rpl17	350.873									Cdk7	551.559
						Flt1	62.1526									Kansl1l	349.737									2410089E03Rik	551.185
						Srsf9	61.9509									Stk25	349.178									Asf1a	550.975
						Gtf2b	61.9025									Lipo1	348.898									Isy1	550.569
						Aqp1	61.1273									Fam220a	348.493									Rab4a	550.405
						Atp8b2	60.8923									Nars	348.36									Rabl3	549.723
						Faim2	60.8367									Calcrl	347.945									Zfp939	549.501
						Hhip	60.7003									Pigp	347.225									Eogt	549.299
						Pik3r3	60.4929									Rint1	346.843									Timm21	549.245
						Fmo2	60.4542									Spop	346.522									Stx5a	548.805
						Slc35e3	60.2396									Xpot	346.487									Zfp800	548.733
						Psma7	60.1758									Atp6v1b2	345.824									2310035C23Rik	548.727
						Igfbp6	60.0779									Fah	345.742									Fndc3b	548.446
						Snx11	59.4168									Rif1	345.419									Golga5	547.781
						Cd36	59.3048									Exoc6b	344.427									Zfp418	547.448
						Med22	59.2054									Usp48	343.187									8030462N17Rik	547.048
						Ccnj	58.7423									Serpinb10	343.092									Tbk1	546.903
						Glis2	58.2542									Kcnma1	342.192									Syf2	546.594
						Cdc25b	58.2081									Dtx3l	342.009									Sin3a	546.391
						Dpysl3	57.3852									Zbtb1	341.645									Commd2	546.16
						Trnt1	57.2637									Tmem2	341.515									Alkbh6	545.885
						Slc43a3	57.1249									Atg10	341.191									Hdhd2	545.759
						Tbc1d25	56.9155									Ube3c	341.132									Atp6v0c	545.675
						Ppp4c	56.6956									Chtop	340.396									Selk	545.412
						Swap70	56.0041									Coq10a	340.186									Fgfr1op2	545.13
						Wnk4	55.9746									Renbp	339.148									5330426P16Rik	544.291
						Slc40a1	55.9481									Vwa5a	338.963									Sfrs18	543.418
						Golga4	55.504									Hif1an	338.606									Atad1	543.168
						Elovl7	55.4906									Amd1	338.015									Lsm6	542.538
						Fbxl8	54.3444									Snx16	336.836									Rnaseh2b	542.132
						Bdh1	54.0452									Rorc	336.117									Ubr1	541.847
						Tspan2	53.8998									Osbpl8	336.094									Mvb12b	541.06
						Atrnl1	53.8609									Ephx1	335.963									Prkab2	540.844
						Trim37	53.1902									Ecsit	335.9									Mrpl15	540.766
						Trf	52.699									Zfp954	335.39									Rtn4	540.711
						Med11	52.6742									Mecp2	333.396									Glyr1	540.51
						Cggbp1	52.5207									Zfp36l1	333.155									Pold3	540.459
						Ptgr1	52.3196									Asb8	332.95									Hmcn1	540.021
						Rap2b	52.2031									Ptpn13	332.021									Suox	539.705
						2310047M10Rik	52.085									Utp15	331.522									BC005624	539.667
						Acot1	51.894									Ddx58	330.544									Shc1	538.879
						Cybrd1	51.6191									Aspn	330.309									Maea	538.738
						Ppp2r3c	50.9671									Uap1	329.109									Fastkd5	538.72
						Slfn5	50.7629									Slc39a9	327.801									Gtf2a1	538.677
						Lrrc32	50.5627									Kctd4	327.6									Rps27l	538.26
						Tmem184b	49.9373									Snx6	327.567									Arcn1	537.732
						Fam83g	49.8372									Mef2a	327.393									Dsg3	537.002
						S1pr1	49.7214									Nxn	326.654									Tmem167	536.769
						Wipi1	49.6843									Mapk14	325.898									G3bp2	536.219
						Yipf4	49.5493									Mtmr10	325.411									Larp4	535.909
						Ppp2r5b	48.6704									Creb3l4	325.405									AI462493	535.856
						Ube2l6	48.6414									Nkiras1	324.693									Mfsd9	535.527
						Nudcd2	48.1063									Cldn12	324.113									Lyrm2	535.426
						1110008F13Rik	48.105									Dpyd	324.058									Prkab1	535.378
						Gcat	47.7054									Cpa4	323.857									0610030E20Rik	535.06
						Sap30	47.5859									Map2k4	323.547									Rab9	534.067
						Fam222b	46.8181									Pex7	323.113									Ppip5k2	533.734
						Tbc1d13	46.637									Glb1l2	322.68									Bri3bp	533.612
						Sft2d1	46.1091									Nedd4l	322.377									Cmas	533.098
						Tmem102	45.6051									Plat	322.154									Eif4enif1	532.848
						Vgll4	45.5557									Adsl	321.928									Fam101b	532.376
						Casp1	45.2897									Ulk3	321.885									Itpa	531.421
						Cdipt	45.1015									D10Wsu102e	320.312									Sox9	531.11
						Rdh10	44.6256									Kdm4c	320.106									Fdx1l	531.038
						Triap1	44.5341									Rab5b	319.837									Rab11a	531.024
						Zbtb2	44.5007									Sumo2	319.557									Mettl14	531.008
						Pgm2	44.4742									Dixdc1	318.936									Ube2q1	530.466
						Wdr53	44.3297									Coq5	318.484									Cdc23	530.353
						Ostf1	44.3144									Arfgef2	317.03									Taf9	530.114
						Ninj1	44.1655									Phka2	316.976									Rars	529.634
						Coro2a	44.1297									Gls	316.187									Hnrnpab	529.423
						Ormdl3	43.9478									Tars	315.414									Atp2a2	529.256
						Dhx38	43.8612									Pagr1a	314.811									Clic4	529.223
						Rnf41	43.8161									Asns	314.121									Fam149b	529.172
						Atp6v0a4	43.8111									Mfsd6	313.628									Rlim	529.047
						Car8	43.7522									Tmem260	312.45									Dennd1a	528.737
						Kctd10	43.6034									Zfp961	312.18									Slirp	528.453
						Mad2l2	42.7723									Lin52	311.523									Gpatch8	528.046
						Ccdc92	42.3842									Pstpip2	311.108									Lcmt2	527.843
						Spryd3	42.0029									Spg21	310.64									Pdia4	527.701
						Gpr137b	41.9756									Serpina9	310.576									Ptges3	527.514
						Tnfrsf4	41.925									Ppap2b	310.545									Ube2k	527.223
						Fmo1	41.5912									Mbnl3	309.382									Mettl21a	527.223
						Ak4	41.4508									Acaca	308.96									Trnau1ap	526.759
						Rab3d	41.206									Lsm14b	306.054									Dtymk	526.602
						Lage3	41.134									Cryl1	304.527									Rpl31	526.024
						Ipo13	40.5949									Epcam	303.905									Arf1	525.935
						Ano10	40.3385									Atxn3	302.652									Tubgcp3	525.835
						Src	40.3355									Chd6	302.589									Tmem208	525.18
						Hace1	40.2228									Ppfibp1	302.558									Magoh	525.068
						Meox2	39.9008									Nr3c2	302.264									Sorl1	524.902
						Elovl6	39.6085									Kpna4	302.185									Zfp639	524.471
						Krtap8-1	39.4971									Nckap5	302.045									Phrf1	523.592
						Arfgef2	39.3565									Rrn3	301.386									Ltn1	523.586
						Cib2	39.3164									Zbtb11	301.225									Paip2b	523.579
						Pip5k1a	39.1075									Bcs1l	300.369									Exoc2	523.477
						Rnf145	39.0867									Pgm3	299.526									Hnrnpr	523.285
						Ankrd13a	39.006									Nsa2	298.58									Mtfmt	523.194
						2410004B18Rik	38.9362									Ift52	298.388									Ndufc2	523.023
						Rnf11	38.9306									Fbxo33	298.311									Prpf6	522.112
						Ctnnbip1	38.5609									Clasp2	297.801									Ebpl	521.966
						Fa2h	38.0775									Cyb5d2	297.591									Tmed9	521.742
						Ube2o	37.8801									Atxn1	296.887									Ift122	521.58
						Reep6	37.861									Hccs	296.793									Zc3h18	520.603
						Sertad3	36.6873									Zfp809	296.779									Nap1l1	520.391
						Pde2a	36.5924									Myo1b	296.42									Tfam	520.186
						Cyba	36.5728									Cxcl12	295.993									Nudt2	520.031
						Fbln5	36.2765									Dach1	295.616									Acp1	519.915
						Fgl2	36.2759									Parp14	295.449									Lekr1	518.9
						Fzd5	36.2325									Mcl1	294.62									Ptpn4	518.516
						Ncs1	36.173									Oxsm	294.504									Mtbp	518.383
						Dirc2	36.1262									Sgcd	294.188									Tgif1	518.251
						Ptp4a1	35.9137									Cyld	293.661									Ppig	517.816
						Ckmt1	35.8036									Rnf141	292.628									Mrrf	517.505
						Usp28	35.5102									Gltscr1l	292.446									Exosc7	517.344
						Zfp296	35.4312									Gcdh	292.024									Rpl36al	517.322
						Zswim1	35.4078									Tmcc1	291.655									Gm13251	516.813
						Unc79	35.393									Gprasp2	291.529									Cspp1	516.222
						Tmem88	35.298									Tspan3	290.974									Atp1b3	516.177
						Prrg2	35.2154									Anxa7	290.92									Slc4a1ap	516.17
						Zbtb18	35.1299									Ppp2r5a	290.521									Vps13b	515.948
						Exo5	35.0647									Stard7	289.671									Emd	515.91
						Dcaf11	34.9198									Naa25	288.377									Sec11c	515.894
						2004-08-01	34.8914									Ascc3	288.126									Atxn1l	515.034
						Hspa2	34.7841									Ralgapb	288.118									Kank1	514.877
						B4galt4	34.718									Srsf5	287.597									Zfp157	514.805
						Bcorl1	34.7158									Nsf	287.409									Anapc10	514.313
						Utp18	34.7103									Zfp867	287.371									Fzd1	513.053
						Zdhhc23	34.4803									Zcchc7	286.965									Pycard	511.613
						Swsap1	34.4267									Arap2	285.569									Brcc3	511.346
						Pofut2	33.8966									Rora	284.804									Zfp748	511.331
						Snrpn	33.6133									4932438A13Rik	284.137									Mertk	510.788
						Mrpl18	33.0328									Epdr1	283.704									Dhrs4	510.467
						Slc38a5	33.028									Ttc39b	283.689									Ap4e1	509.092
						Anapc13	32.7159									Josd1	282.806									Myl6	507.053
						Cited4	32.672									Rcan1	282.581									Gpank1	507.053
						Snx15	32.3689									Crebrf	282.474									Trim44	506.3
						Eltd1	32.3178									Trip11	282.314									Sars	506.182
						Fam189a2	32.1637									Nol7	280.045									Calm3	506.176
						Lig4	32.0414									Ppp1r9b	279.809									Hbp1	505.904
						Ddah2	31.9678									Sntb2	279.574									Luzp1	505.617
						Fbxo42	31.9138									Lima1	279.528									Mrpl1	505.483
						Wbp5	31.5216									Fam213a	279.471									Ube2l3	505.232
						Entpd1	31.344									Cgnl1	279.017									Gtf2a2	505.225
						Dll1	31.2571									Dcbld1	278.418									Ivd	504.837
						Dct	31.1916									Tspyl2	278.314									Zfp609	504.419
						Bid	31.0273									Fgf1	277.641									Cdc25a	504.152
						Mreg	30.9477									Kcnk10	276.516									Ikbkg	502.398
						Tyro3	30.8426									Rbl2	276.129									Smarca5-ps	502.177
						Tmem203	30.8262									Dpy19l1	275.939									Slc35g1	501.804
						Armcx6	30.5194									Vmn2r29	275.479									Rabl5	501.704
						Myo19	30.3473									Kctd13	275.058									Stx18	500.824
						Ccdc32	29.9638									Cep170	274.609									Atr	500.8
						Mapk8ip1	29.7982									Mier3	274.53									Ctcf	500.042
						Btbd1	29.6493									Pcbd1	274.524									Fbxl20	499.92
						Trim62	29.55									Cyb5b	273.493									Tmem141	499.809
						Slc35c2	29.3794									Stard4	273.208									Tfap2b	499.63
						Trappc4	29.1872									Itgav	272.985									Zfp266	499.536
						Gpr153	29.0011									Kcnj15	272.646									Elac1	499.456
						Spata2	28.3508									Yae1d1	272.636									Ndufv2	499.278
						Ltn1	28.3139									Slc25a11	271.738									Spag9	499.157
						Aggf1	28.2817									Pigf	270.659									Atf6	498.675
						Stradb	28.0733									Pdxk	270.461									Ppme1	498.598
						Mtx1	27.851									Ppm1d	270.363									Hspd1	497.933
						Lrguk	27.6807									Lrrfip2	269.755									Vkorc1	497.901
						Anpep	27.5138									Slc25a32	268.807									Kdm5d	497.377
						Tmem246	27.3234									Prkar1a	268.594									Klf7	497.359
						Fam171a2	27.304									Phb2	268.37									Abhd10	495.486
						Dusp23	27.111									Mynn	267.453									Trit1	495.283
						Tmem189	27.0987									Alox8	265.987									Pms2	495.067
						Tulp3	26.9117									6030458C11Rik	265.195									3110052M02Rik	495.037
						Krtap7-1	26.8815									Acap2	264.849									1110059E24Rik	494.892
						Ppp1r14b	26.4033									Anapc16	264.653									Rbbp6	494.475
						A430005L14Rik	26.3784									Snapc1	264.559									Emc4	494.295
						Fibp	26.227									Rpp14	264.475									Gapdh	493.894
						Pde4d	26.0548									Slc25a13	264.396									Erc1	493.421
						Rps28	25.9866									St6galnac5	263.574									Maged1	492.172
						Pradc1	25.9858									Pcgf6	263.455									Nup54	492.153
						Htr1d	25.9431									Tmem245	262.817									Degs1	491.062
						Gnai1	25.916									Armc1	262.816									Ccdc130	490.789
						Col8a1	25.8645									Sorcs3	262.801									Ofd1	490.542
						Trp53inp2	25.825									Ralgps1	262.064									2210418O10Rik	490.283
						Akirin1	25.7965									Dennd4a	261.561									Leprot	489.96
						Coq10b	25.6796									Bms1	261.554									Pld1	489.116
						Fam46a	25.3517									Crebl2	261.261									Tnrc6a	488.598
						Pcbp4	25.1536									Mpp5	260.726									Aak1	488.509
						Cib1	24.622									Zyg11b	260.327									Ier3ip1	487.932
						Sesn2	24.505									Bbs9	259.273									Dph3	487.736
						Abcg1	24.1895									Top1mt	259.259									Smc5	486.568
						L1cam	24.1226									9230110C19Rik	259.209									Dynll1	484.611
						Ccdc88c	24.09									Leprel1	259.206									Ddb2	484.289
						H2-T22	24.0553									Wwp2	259.199									H3f3b	482.529
						Fam89b	23.9402									Cck	258.982									Spice1	482.121
						Cmtm7	23.929									Pard6g	258.522									Ybx1	481.971
						Tbx3	23.7137									Plcg2	258.21									Trps1	481.485
						Vim	23.5529									Mtfr1l	258.015									Comt	481.47
						Pgap1	23.5135									Fv1	257.522									Baz1b	481.294
						Slc6a9	23.4926									Hoxb2	257.416									Mphosph6	480.621
						Ets2	23.3808									Has2	256.781									Zfp292	480.609
						Wnt4	23.3688									Snx25	256.147									Alkbh3	480.179
						Uqcrh	23.3121									Cyp2d22	255.671									Zdhhc16	479.821
						Cnnm4	23.3079									Cdk10	255.634									Arhgap12	478.491
						1700123O20Rik	23.0956									Ripk2	254.259									Cklf	478.462
						D8Ertd82e	22.9154									Car5b	253.984									Kdelr2	477.266
						Cacnb3	22.7502									Erap1	253.57									Pus10	477.148
						Ggt5	22.4538									Mtap	253.299									Tmed2	477.001
						Art4	22.4048									Ngef	252.799									Exosc9	476.671
						Clcn7	22.3838									Tcf4	252.432									Hspe1	476.623
						Fam199x	22.3763									Mitf	251.453									Drosha	476.197
						Suclg1	22.3647									Itpripl2	250.138									Ero1l	475.855
						Cxcl16	22.2451									Flot2	250.118									Chrac1	475.507
						Vat1	21.8393									Crim1	249.56									Poldip2	474.867
						Glrx3	21.572									Slc29a1	249.547									Ttc26	474.635
						Nudt10	21.2945									Efnb2	249.243									Mrpl27	474.604
						Crcp	21.2112									Kcnk2	249.207									Rnf111	474.091
						Mepce	21.1991									Necap2	249.148									Txnl1	473.245
						Prdx5	21.1007									Bhlhe41	248.729									Rnf103	472.097
						Tmem38b	21.0862									Dnal1	247.891									Vps45	472.03
						Iscu	21.0733									Pip4k2b	247.383									Zkscan8	471.659
						Palm	20.9543									Ppm1a	246.89									Glce	471.384
						Kansl2	20.807									Msl2	246.679									Tsg101	471.146
						Podxl	20.7278									Capn5	246.012									Rnf138	470.484
						4632428N05Rik	20.5748									Spen	245.88									Ccdc66	467.857
						Uqcrfs1	20.5429									Rbm12b1	244.802									2010111I01Rik	466.767
						Mgll	20.207									Sh3d19	244.786									Ahsa2	466.367
						Slc46a3	20.0454									Edem1	244.715									Maml2	466.171
						Rfxap	19.8763									Usp24	244.403									Zscan29	464.997
						Tsr3	19.8641									Vrk2	244.085									Rpl12	464.886
						Slc25a39	19.4062									Arntl2	243.913									Ywhaq	464.838
						Pnpla2	19.2956									Bap1	243.848									Stox2	464.746
						Rab11fip1	19.227									Arhgap18	242.936									1600012H06Rik	464.33
						Cox4i1	18.9797									2001-08-01	242.173									Gatad1	464.242
						Tcn2	18.8438									Map3k4	241.959									Zcchc4	461.886
						Creb3l1	18.6811									Il31ra	240.255									Cbll1	460.424
						Foxo4	18.2043									Fmn1	238.716									Cnot3	459.077
						Slmo2	18.1851									Jtb	238.6									Zfp329	458.832
						Sowahc	18.1036									Desi2	238.28									2410015M20Rik	458.339
						Slc9a9	18.044									Mettl2	237.656									A830080D01Rik	458.263
						Adcy9	17.877									Cog4	236.572									Slc25a30	457.599
						Carhsp1	17.8144									Abca5	235.798									Gm14420	457.432
						Fam212a	17.7311									Lpcat2	235.306									Plekhg1	456.962
						Tnik	17.6078									Cds1	233.838									Rabepk	456.058
						Sipa1l1	17.5245									Alg2	232.393									Dzip3	456.048
						Shkbp1	17.2446									Lphn2	231.889									Pfdn4	454.412
						Casr	16.8838									Arhgef12	230.928									2610044O15Rik8	453.951
						Phf23	16.8124									Ogfrl1	230.83									Hmgb1	453.94
						Adora2b	16.6445									Nr4a2	230.738									Taf1d	451.152
						Car6	16.5237									Sec23b	230.481									Camsap2	451.143
						Nkd1	16.4793									Sssca1	230.13									Aamdc	450.509
						Bod1	16.2158									Rab38	228.635									Zfp68	450.47
						Serpine2	16.1023									Thg1l	228.632									Zfp788	450.05
						Sema4c	15.965									N4bp1	228.017									Zfp185	448.82
						Nid1	15.9535									Tnfrsf22	226.018									Smchd1	447.419
						Cwc27	15.7932									Luc7l	225.98									Klhl23	447.348
						Msx2	15.7867									Ppp1r3c	224.47									Haus1	445.997
						Rnf208	15.7673									Fbxo21	224.088									Nipsnap1	445.851
						BC022687	15.6775									Ccdc17	223.023									Tcf7l2	445.819
						Klhl8	15.6738									Zfp398	221.894									Dnajc15	445.577
						Myc	15.6208									Slc35f2	221.479									Hyal1	444.995
						Serinc2	15.6124									Clybl	221.144									Ralgapa1	444.117
						Tmem229b	15.5276									Slc25a16	221.081									Srsf3	443.935
						Fam19a5	14.8551									Cds2	220.513									Ankrd40	443.424
						Med4	14.8016									Mill1	220.302									Mrpl33	443.124
						Nipa1	14.7754									Tmem64	220.211									Mbtd1	442.894
						Mad2l1bp	14.3656									Cd109	219.63									Zfp39	442.395
						Gpn2	14.2587									Fmnl2	219.604									Cops8	441.151
						Alg10b	13.8677									Fzd4	219.445									Psmb2	439.913
						Amigo2	13.3526									Stk38l	218.401									Zfp763	439.095
						Susd2	13.1075									Ube2q2	218.397									Parva	439.074
						Scn1b	12.8697									Pxdc1	218.387									Ppm1b	438.105
						Cmtm8	12.7976									Slc39a1	218.243									Chn2	437.508
						Cpeb2	12.6342									Adh7	217.612									Bhlhb9	437.353
						Cox7a2l	12.5609									Snora65	217.39									Acer3	436.673
						Mpp2	12.3664									Smpdl3b	217.152									Ncrna00085	435.5
						Mettl7a1	12.1374									Pfkm	217.124									Chd1	435.228
						Rps23	11.9905									Fam26e	216.647									Map7	434.069
						Gal3st1	11.7765									Paxbp1	216.047									Nit1	433.606
						Ier5	11.6409									Zfand1	215.984									Wrb	433.5
						Acer2	11.5175									Ocrl	215.648									Naga	433.325
						Cpq	11.5074									Irgm2	215.427									Polr3gl	433.178
						Slc1a4	11.188									Nr1d2	215.349									Ttll10	433.011
						Ufc1	11.0207									4930523C07Rik	214.773									Tpd52l2	432.982
						Nod2	10.5616									Qars	214.293									1110002L01Rik	432.699
						Fam117a	10.0429									Serpinb1a	214.263									Ndufb9	432.464
						9930014A18Rik	9.29138									Narf	213.472									Psma5	431.677
						Tyrp1	8.65964									Yars	213.251									D19Ertd737e	430.976
						Etfa	8.57906									Pcdh7	212.239									B3galtl	430.483
						Erc1	8.53883									Isca1	212.152									Zfp933	429.553
						Krtap11-1	8.42788									NA	211.621									4930444A02Rik	429.377
						Orai1	8.4255									Rnf19b	210.52									Isca2	429.375
						Darc	8.15387									Rrp8	210.154									Asb7	428.342
						Gm10767	8.06365									Tob1	209.972									Paip2	428.271
						H2-Aa	7.87544									Mical3	209.305									Dcaf13	428.221
						Hsph1	7.85513									Slc22a3	209.065									G2e3	428.201
						Krt25	7.63655									Klhl28	208.351									Cd46	427.907
						Ddt	7.31632									2610301B20Rik	208.286									Inpp5k	427.251
						Oaz1	6.43886									Cask	208.08									Vegfb	426.904
						Krt84	6.37577									Tshz2	207.979									Sv2a	426.184
						Ube2e2	6.21031									Dusp3	207.492									Impa1	425.876
						Dsg4	6.13878									Kbtbd4	206.405									Dync2h1	425.761
						Zfp607	6.12542									Fbxl21	206.215									Mplkip	424.498
						Krt28	6.07255									Socs6	205.115									AW554918	424.346
						Krt27	6.03282									Slc9a6	203.82									Cep70	424.303
						Krtap20-2	5.71915									Galnt7	203.744									Ccdc167	423.575
						Fam211b	5.52943									Homer2	203.616									2410002F23Rik	422.328
						Tchh	4.58536									Dym	202.963									Mrpl40	421.907
						Plac9a	3.78414									Plekhb2	202.827									Napg	421.808
						Acp1	2.69199									Smurf1	202.819									Tbc1d32	421.171
						Krt31	2.28547									Inpp5f	202.32									Metap2	420.578
																Nt5dc3	202.165									Gas5	420.276
																Ino80	201.539									Sntb1	419.631
																Pdik1l	201.437									Aagab	419.423
																Spryd4	201.152									Cox11	418.991
																Habp4	200.504									Phtf2	418.081
																Col6a1	200.097									Rnf34	416.645
																Akt3	199.413									Pibf1	414.96
																Synj2	199.126									Ccdc47	413.765
																Tgfb2	198.342									Babam1	413.569
																Msh2	197.536									Mfap3	413.429
																Tdrd7	197.033									Hnrnpa1	412.593
																Ppp4r2	195.343									1600002H07Rik	412.503
																Eif2b3	195.277									Cpsf7	410.673
																1700029J07Rik	194.512									Rnf181	410.656
																Car13	194.306									4933411K20Rik	409.509
																Sap18	194.279									Shprh	409.175
																Dennd2c	193.933									Kirrel	408.631
																Fam129a	193.774									Srsf2	408.428
																Ablim1	193.171									Cbwd1	408.425
																Plek2	192.875									Zfp397	407.906
																Eml4	191.085									Eif4g3	406.792
																Usp22	190.263									Bbs5	406.207
																Rfwd3	190.024									NA	405.967
																Tmem43	189.083									2610005L07Rik	405.883
																Insig2	188.747									Trim68	405.003
																Ocln	188.516									Myzap	402.292
																Pi4k2a	188.327									Tgs1	402.167
																Dnmbp	187.695									Mdm4	402.014
																Sfxn1	187.553									Dnajc18	401.415
																Galnt18	187.501									Brms1	400.886
																Itga4	187.423									Josd2	400.77
																Ebf1	186.779									Gosr2	400.417
																Smim12	186.711									Alyref	399.325
																Clmn	186.295									Zfp780b	398.824
																Dstyk	185.32									Ube2m	397.581
																Cpped1	185.003									Lsm4	396.197
																Pgm2l1	184.813									Akap8l	396.033
																Hagh	184.076									Atp5g2	395.703
																Rab30	183.824									D430042O09Rik	394.295
																Ccdc41	183.168									Sdhb	391.97
																Ttc28	182.955									Psmc5	388.937
																Rp9	182.48									Gnrh1	388.756
																Gtpbp8	182.161									Bcl9	388.671
																Cnksr2	181.659									Mcts2	388.262
																Chd9	181.64									Mrpl42	387.269
																Parp9	181.244									Rev3l	385.511
																Sdf4	180.92									Fggy	385.312
																Stom	180.477									Hoxa5	384.71
																Ptk2	179.987									Zfp612	384.016
																Ulk2	179.917									Npr2	382.857
																Rabif	179.721									Zfp946	382.027
																Esyt2	178.988									Dyrk2	381.114
																P2ry1	178.296									Cflar	381.021
																Bmp6	178.057									Dynlt1a	380.473
																Akr1b10	176.793									Timm22	379.879
																Spata5	176.48									Jmjd1c	379.266
																Plekha1	175.923									Faim	378.629
																Dclk1	175.585									Ednra	377.879
																Rapgef5	175.579									Glb1l	377.607
																Sqrdl	175.328									Ccdc137	377.17
																Cxcl9	173.994									Trmt6	376.894
																Ehd4	173.911									Arl6	374.21
																Plekhg3	173.716									Oaz2	373.261
																Tmem55b	172.632									Dennd2d	372.982
																Piwil2	171.492									Aste1	372.309
																Atp7a	170.963									Mpdz	371.896
																Pdcd10	170.431									Mthfs	369.585
																Foxc1	170.357									Zfp930	369.316
																Baiap2l1	169.945									Coq3	368.607
																Nudt3	169.562									Tomm20	368.134
																Ogfod1	169.268									Kdelc1	367.767
																Eva1a	168.403									Tmem60	365.364
																Tspan14	167.537									Duxbl1	364.06
																Ldhb	167.411									Tns1	363.508
																Lrrc14	167.152									Jmy	361.471
																Plcd1	167.008									Pus7	360.247
																Eif5a	166.191									Camkmt	359.833
																Rnf6	165.468									Klhl22	358.87
																Bnip3	164.92									Zfp326	358.607
																Bloc1s5	164.888									Ssbp3	358.252
																Cbfa2t2	164.814									Efcab1	357.605
																Qsox2	164.294									Slc38a6	357.014
																Daglb	164.289									Daxx	356.595
																Oplah	164.249									Fgfr1op	355.724
																Rev1	163.784									Tipin	353.099
																Ampd2	163.668									3010026O09Rik	351.637
																Supt3	163.497									Leng8	351.142
																Ehbp1	163.451									Cenpc1	350.787
																Hopx	163.015									Sec24d	350.121
																3110007F17Rik	162.622									Mtif2	349.944
																Lrch1	162.346									Pfdn5	349.656
																Ptprj	162.225									Arl10	348.423
																Cldn8	162.206									Abcd1	348.073
																Ehmt1	160.629									Naca	347.869
																Tspan17	160.222									Cenpo	346.609
																Rmdn3	159.728									Naa10	345.518
																Agmo	159.642									Slc33a1	344.339
																Hivep2	158.76									Vldlr	344.223
																Uba5	158.688									Fau	342.688
																Sphkap	157.805									Cox7b	338.302
																Mfsd11	157.293									Tagap1	337.939
																Spsb2	156.346									Tmed8	337.513
																A330023F24Rik	155.564									Pus3	336.932
																Cirbp	154.591									Camsap3	332.408
																Myo1d	153.376									Urb2	331.911
																Mtr	153.212									Rybp	331.229
																Ntmt1	152.823									Rplp2	329.211
																Aloxe3	152.18									1700012B15Rik	328.867
																Iqgap1	150.702									Wdr78	328.697
																Gprin3	149.908									Rab2b	328.62
																A430033K04Rik	148.807									Klhl12	328.544
																Zc3h6	148.768									2003-08-01	328.004
																9030624J02Rik	148.602									Zbtb44	326.978
																Unc13b	148.557									Mir383	325.84
																Camk1	147.834									Shisa5	324.46
																Gmds	146.721									D230041D01Rik	324.316
																Apeh	145.597									Stau2	323.597
																Cyb5d1	145.196									Ifitm2	323.128
																Kif16b	144.952									1700094D03Rik	322.912
																C230052I12Rik	144.477									Acot8	321.716
																5031439G07Rik	144.32									Mospd2	321.675
																Acad11	144.319									Cnp	321.231
																Nbas	144.302									Nin	320.313
																Ptprm	144.097									Ppcdc	319.657
																Bok	144.072									Bcl2l11	317.782
																Coq2	143.676									2210404J11Rik	317.523
																Snord37	141.255									Smim15	317.461
																Trdmt1	140.641									Pik3r1	316.723
																Gsdma3	140.246									Ilf3	315.787
																Gbp2	139.889									U2af1l4	315.766
																Zfyve21	139.757									D10Jhu81e	310.348
																Mras	137.322									Snrnp70	310.321
																Mpzl2	136.973									Rbx1	309.384
																Gid4	136.443									Wdr34	308.114
																Commd5	136.183									Smarcal1	307.96
																Fbxo16	136.179									Rrnad1	307.378
																Urb1	136.177									R3hcc1	304.814
																Vav3	136.164									Rbfox2	304.175
																Jarid2	136.044									Fam214a	302.563
																Map2k1	135.986									Zadh2	302.385
																Prcp	134.752									Cxcl14	299.13
																Samhd1	134.63									Gng5	298.747
																Nfia	134.622									Mea1	294.124
																Ppap2c	134.233									Esyt3	292
																S100a4	134.163									St3gal4	289.651
																Rfc4	133.862									Zfp1	287.551
																Tk2	133.193									3110057O12Rik	287.318
																Pecr	133.075									Acy1	286.916
																Nub1	132.528									Pnldc1	286.353
																Mrgprf	132.334									Rsrc1	286.063
																Klhl11	132.144									Arglu1	285.92
																Bloc1s3	132.125									Oas1b	285.699
																Hes1	132.038									Nphp1	285.499
																B3galt6	131.976									Cand2	285.173
																Fjx1	131.56									Mpp7	284.972
																Gstt1	131.507									C230030N03Rik	284.964
																Usp18	130.884									Nat6	280.663
																Slit3	130.839									Sdccag8	280.636
																Stap2	130.719									Caprin2	279.162
																Micu1	130.588									Dus4l	278.542
																Ak3	130.467									Klhl2	276.415
																Mboat1	130.195									Ell	276.146
																Rab22a	129.61									Gdpgp1	274.855
																Thap2	128.795									Klhl29	273.965
																Egln3	128.447									Rad9a	273.605
																Fam185a	127.765									Suclg2	272.457
																Usp38	127.608									Lgals12	272.28
																Tmx4	126.754									Tctn1	266.487
																Egln1	126									Tnni3	265.176
																Mfsd7b	125.485									Tatdn3	264.161
																Thada	125.455									Srrt	262.567
																Kif13a	124.961									Krtap2-4	261.409
																Pik3cb	124.892									Fkbp7	260.583
																Cdh13	124.812									Pygb	257.602
																Mpc1	124.796									Odf2l	257.358
																Slc48a1	124.612									Sdad1	256.256
																Qdpr	124.457									Zfp354c	254.598
																Tmem170b	124.304									Prpf31	252.501
																Cyth1	123.81									Trabd2b	250.987
																Mmgt2	122.446									Dnttip2	249.784
																Gstt3	122.373									Nme4	244.994
																Tmem109	120.624									Zc3h6	242.634
																Stxbp1	120.602									Senp8	241.748
																Ier3	120.532									Gas8	232.248
																Gas7	119.881									Pex10	230.505
																Pspc1	119.333									Fnbp4	230.424
																Zbtb10	118.823									Rmdn1	229.356
																Rps6ka2	118.561									Oas1c	228.989
																Hsd3b7	118.467									Chkb	225.442
																Wdr77	118.424									Tctn2	224.757
																Gpr155	118.098									Eno3	224.079
																Abhd14b	117.873									Mfsd8	223.528
																H2-T9	117.697									AI987944	220.359
																9130008F23Rik	117.433									Cwc22	218.444
																Rnf213	117.338									Ylpm1	213.515
																Lonrf1	117.129									Ankrd16	207.472
																Dbp	116.665									Slc35b3	203.115
																Prdx6	116.416									Gm973	202.476
																Gem	116.254									Rbmx2	198.506
																Foxq1	116.168									Krtap5-1	191.477
																Krt75	115.441									Tnfrsf10b	186.578
																Man1b1	114.535									Sdk2	186.288
																S1pr3	113.578									Pcnp	185.658
																Mdn1	113.06									Gapdhs	184.22
																Thbs2	112.888									Il18bp	183.624
																Lix1l	112.742									Sry	182.823
																Ubl3	112.736									Zfp944	178.801
																Rbm3	112.531									4930422G04Rik	176.694
																Cpeb1	111.423									Rrp1b	170.844
																Nom1	111.409									Pdgfrl	168.223
																Mthfd1l	111.369									Lpp	165.788
																Steap3	110.627									Prdm11	148.246
																H2-K1	109.496									Rerg	147.529
																Chml	109.183									Zfp462	146.446
																H2-Q7	108.679									Catsperg1	143.295
																Wsb2	108.588									Hoxb4	143.163
																Chd7	108.359									Acrbp	142.522
																Zfp263	108.264									Zfp438	140.334
																Pvt1	108.167									Necap1	130.933
																Chit1	108.012									Fgfr1	126.682
																Bcl10	107.845									Gcfc2	124.867
																Angel1	107.66									Irx1	123.196
																Gne	107.266									Mir680-1	111.616
																Plscr4	107.216									Slc25a27	93.3509
																Pip4k2a	107.05									Fbl	81.5891
																Mcur1	106.681
																H2-D1	105.555
																Kifc3	105.435
																Atp10d	105.286
																Pld2	104.626
																Cx3cl1	104.323
																Tmem185b	104.161
																Ltb4r1	103.742
																4930402H24Rik	103.49
																Snx33	103.472
																H2-Q6	103.38
																Ndrg1	103.26
																Tmem56	102.38
																Hlf	102.362
																Ogfod3	101.689
																Aldh3a1	101.301
																Cers4	101.291
																Trip10	101.088
																Enpp4	100.164
																Adcy4	99.8287
																Ptpn14	99.0389
																Trpv3	98.5579
																Dock9	98.4943
																Acss2	98.3627
																Tnxb	98.1353
																Syne2	98.0688
																Rel	95.6013
																Cnksr1	95.3405
																Lrrfip1	95.1845
																Camk2d	94.6742
																Samm50	94.5041
																Tmem45a	94.4555
																Nog	94.4038
																Ahnak2	94.3692
																H2-Q4	94.0753
																Adck3	93.8444
																Pacsin2	93.3232
																Adipor2	93.2122
																Aim1l	93.0909
																Gsn	92.2874
																Dhrs7	92.1776
																Rad9b	91.5217
																Smpd1	91.4296
																Phf16	90.9308
																Acsl4	90.8642
																C9	90.1784
																Ptpn3	89.979
																Nlrc5	88.8293
																Fam76a	88.5979
																Slc16a2	88.3363
																Aldh4a1	88.1464
																Per3	88.0911
																Ubtf	87.9509
																Sh3rf2	87.5089
																G6pc3	87.3205
																Plekhh2	87.1775
																Ralgapa2	87.0342
																Il20rb	86.9412
																Gm7030	86.7522
																H2-Q8	86.6422
																Klhl42	86.3712
																Akr1b8	86.3423
																Lss	86.2688
																Plekha2	85.7436
																Gm129	85.3825
																Tbc1d14	85.2117
																Gpr115	84.8808
																Wnt3	84.8514
																Pcgf5	84.3865
																6430548M08Rik	83.9294
																Letmd1	83.719
																Tenm3	83.422
																Eif3f	83.2864
																Ttc7	83.0847
																Socs2	82.9945
																Fggy	82.9492
																Ebna1bp2	82.828
																Card10	82.3892
																Trpc1	82.2065
																Imp3	81.5695
																Dhrs11	81.5479
																Gm6644	81.0155
																Ralbp1	80.97
																Parp12	80.8145
																Ntf3	80.6112
																Rnf165	80.537
																Wrap73	80.4449
																Rasgrp1	80.3021
																Ccdc117	80.2571
																Alad	80.1315
																Repin1	80.1004
																Camkk1	80.0084
																Marveld1	79.9961
																Sema4b	79.5448
																Lpar2	79.3812
																Tnfrsf19	79.0546
																Il17rc	78.9979
																Arrb1	78.6636
																Alox12e	78.0345
																Itpr2	77.2073
																Cmtm4	76.7294
																Ube2v1	76.7013
																Dnajc16	76.2872
																Mgst1	76.2784
																Lypd6	75.7616
																Tlcd2	75.7159
																Slc22a15	75.6656
																S1pr5	75.3477
																Polh	75.2183
																Pthlh	75.1167
																St3gal6	74.9631
																Atp6v0a1	74.7888
																Ptger4	74.7335
																Ick	74.7193
																Rpl12	74.4457
																Cables1	74.2703
																Plxdc1	74.1097
																Ccni	74.0617
																Ipo4	73.8796
																Slc6a2	73.7776
																Avpi1	73.7431
																Asb7	73.6064
																Fam83f	73.5492
																1700084J12Rik	73.3403
																Exph5	72.708
																Tap1	72.6414
																Fam203a	72.4198
																Per2	72.4
																Pink1	72.2516
																Cab39l	72.1881
																Tmco4	71.7887
																Nars2	71.778
																Irgm1	71.6377
																Fam63b	70.7985
																Fam129b	70.4686
																Cndp2	70.2654
																Acot2	70.0759
																Tceal3	69.9757
																Slc12a2	69.4061
																Tap2	69.1578
																Ephb3	69.1076
																Arsb	68.9706
																Slc35a4	68.8941
																Cbx7	68.5091
																Rnf185	68.4519
																Fam83h	68.2751
																Ivns1abp	68.0292
																Nr1d1	67.7184
																Diras2	67.7139
																Mvp	67.084
																Slc2a5	67.0119
																Tlr5	66.9226
																Klhl21	66.8934
																Pla2g2f	66.8839
																Smoc2	66.5563
																Tead1	66.0312
																Tmem184a	65.9413
																Hoga1	65.8905
																Anxa1	65.107
																Ccnd2	64.9816
																Btg1	64.8918
																Pcyt1a	64.5966
																Irf1	64.3025
																Tgfbr3	64.2815
																Bhlhe40	64.2369
																Dgat2	64.1869
																Ptgs2	63.9201
																Lrrc1	63.6055
																Mthfd2l	63.5863
																Amacr	63.4285
																Anxa11	63.3798
																Slco2a1	63.3726
																Fam81a	63.2668
																Mfn2	63.2226
																Crlf1	63.0533
																Nppc	63.0095
																Trmt10c	62.9479
																Itpkb	62.476
																Dlx5	62.4673
																Rapgefl1	62.1469
																U2af1	62.0882
																Slc27a6	62.066
																Gata6	62.0067
																H2-T10	61.8778
																Cep350	61.6903
																Osbpl3	61.4494
																Sipa1l2	60.7377
																Cbr2	60.4669
																Slc2a1	60.4294
																Il34	60.2927
																Pik3r2	60.2535
																Polr1b	60.0923
																Prkcq	59.5562
																Lats2	59.2902
																Grik1	59.0903
																Tmc6	58.7842
																Slc15a4	58.7306
																Supv3l1	58.3766
																Fbxl6	58.3607
																Ripk4	58.3375
																Sfxn3	58.0234
																Oxtr	57.9216
																Fam20b	57.5025
																Kcnj2	56.9944
																Tbc1d17	56.5092
																Pomt1	56.2906
																Rnf149	56.195
																Adamts3	55.9448
																Phf1	55.6015
																Tacstd2	55.39
																Grk5	55.3529
																Afap1	55.1237
																Ifrd2	54.8333
																Slc2a12	54.3481
																Dip2b	54.2752
																Hebp2	53.9747
																Enc1	53.8576
																Skint3	53.7033
																Slco2b1	53.5645
																Scin	53.3857
																Srxn1	53.1558
																Slc27a3	52.8357
																Ltb4r2	52.5331
																Zfp566	52.2695
																Zrsr1	52.1597
																Slc14a1	51.9886
																Dsg2	51.8254
																Abhd5	51.5863
																9530053A07Rik	51.4458
																Psmb9	51.4392
																Stk40	51.1552
																Nfkbiz	51.04
																B4galnt1	50.7335
																Traf5	50.6945
																Aknad1	50.6812
																Fnip2	50.6562
																Glt8d2	50.6196
																Reep5	50.5146
																Il33	49.4886
																Pvr	49.1243
																Grhpr	47.4133
																Dohh	47.247
																March5	46.6583
																Fastkd1	46.6403
																Ank3	46.5807
																Llgl2	46.5489
																Gsr	46.0762
																Acad10	45.9872
																Phyhipl	45.891
																Ssh1	45.1802
																Spry1	44.8971
																Chsy3	44.8865
																Ano1	44.7461
																Smyd2	44.6672
																2210404J11Rik	44.3346
																Atp10a	43.6987
																Wif1	42.7195
																Il12rb2	42.535
																Xbp1	42.1805
																Paqr7	41.9112
																Mir140	41.3502
																Gjb4	40.1925
																Aadac	40.129
																Foxred2	40.0156
																Fzd8	38.8271
																Sh3pxd2a	38.5909
																Slc22a4	38.457
																Slx1b	38.0979
																Zfp747	37.6946
																Eif3h	36.8985
																Rab11fip4	36.177
																Ttc39a	36.0132
																Cnpy4	36.0097
																Dock8	35.9422
																Loxl4	35.9195
																Acp6	35.8128
																Cdc42ep1	35.5272
																Serpina3f	35.0258
																Atg4d	34.8281
																Sh3gl2	34.5579
																Il20ra	34.4095
																Mir23a	33.4033
																Gpatch2l	33.3717
																Sox7	33.0363
																Lefty1	32.9672
																Cnksr3	32.9214
																Sectm1b	32.8305
																Rab33b	32.165
																Gadd45b	32.1239
																Keap1	32.0872
																Slc16a14	32.0314
																Cysltr1	31.5638
																Atp10b	31.2588
																Adra2a	30.784
																Fbxo31	30.7154
																Tef	30.6343
																Ppp1r35	30.2318
																Ptges	29.7105
																Alyref2	29.3802
																Tm4sf1	29.2673
																Gbp7	28.9452
																Crybg3	28.9075
																Rapgef3	28.8037
																Hs3st3b1	28.4451
																Crat	28.0845
																Cerk	27.8041
																Zfp931	27.0763
																Csf1	26.7409
																Pik3c2b	26.6868
																Ass1	26.1144
																Rhbdl3	26.0428
																Olfr1148	25.8734
																H2-K2	24.909
																Mir27a	24.9027
																Brox	24.8387
																Mn1	23.2529
																Pim1	23.205
																Kcnh3	22.7794
																Phldb2	22.3004
																Papln	21.4842
																Vwa7	21.119
																Csprs	21.0098
																Jph1	20.6376
																Cbs	20.5523
																Tnfaip3	19.6615
																Nhlrc2	19.5346
																9130019O22Rik	19.0702
																Tmem108	18.3755
																Fam83c	17.6457
																4933427G23Rik	16.983
																Btbd19	16.8773
																Abcb1b	16.5741
																Jun	16.3308
																Lrat	16.2792
																Pcnx	15.9927
																Mettl9	15.9054
																Prelp	15.8362
																Rsad1	15.309
																Slc16a13	15.2001
																Impdh2	15.0133
																Tsfm	14.7714
																Zfp330	14.3037
																Slc25a45	14.2306
																Il4ra	13.4342
																Rpia	12.5229
																Tmx2	12.4976
																Mipol1	11.7344
																Dusp1	10.6705
																Mup2	9.73739
																D1Ertd622e	8.84652
																Tgm2	4.67362
																Snord14d	4.14471
